# Supplementary material for: Tracking the relation between gist and item memory over the course of long-term memory consolidation
Source: eLife journal article supplement (doi:10.7554/elife.65588), 2021-07-14
Supplement: supp [file elife-65588-supp-v2.zip]

Archive with 14 entries (14 files):
- elife_poa_e65588_Transparent_Reporting_File.pdf
- elife_poa_e65588_Figure_2_figure_supplement_1.ai
- elife_poa_e65588_Figure_2_figure_supplement_2.jpg
- elife_poa_e65588_Figure_4_figure_supplement_1.jpg
- elife_poa_e65588_Figure_2_source_data_1.csv
- elife_poa_e65588_Figure_2_figure_supplement_1_source_data_1.csv
- elife_poa_e65588_Figure_2_figure_supplement_1_source_data_2.csv
- elife_poa_e65588_Figure_2_figure_supplement_2_source_data_1.csv
- elife_poa_e65588_Figure_3_source_data_1.csv
- elife_poa_e65588_Figure_4_source_data_1.csv
- elife_poa_e65588_Figure_5_source_data_1.csv
- elife_poa_e65588_Figure_5_source_data_2.csv
- elife_poa_e65588_Figure_6_source_data_1.csv
- elife_poa_e65588_Figure_7_source_data_1.csv
