# Supplementary material for: Tracking the relation between gist and item memory over the course of long-term memory consolidation
Source: eLife journal article supplement (doi:10.7554/elife.65588), 2021-07-14
Supplement: supp [file elife-65588-supp-v2.zip › elife_poa_e65588_Figure_2_figure_supplement_1_source_data_1.csv]

	ID	group	memoryType	error	chance	chance2
1	1	24 hours	dind	51.1508032578232	348	266.9
2	2	24 hours	dind	141.876775517415	348	266.9
3	3	24 hours	dind	34.2803337838862	348	266.9
4	4	24 hours	dind	69.4305068553753	348	266.9
5	6	24 hours	dind	57.4686454735172	348	266.9
6	7	24 hours	dind	49.0760876560013	348	266.9
7	9	24 hours	dind	59.3206994400672	348	266.9
8	11	24 hours	dind	125.549551553703	348	266.9
9	15	24 hours	dind	86.6551775175931	348	266.9
10	16	24 hours	dind	89.5126297125408	348	266.9
11	17	24 hours	dind	45.3563514118419	348	266.9
12	18	24 hours	dind	56.3525603173068	348	266.9
13	19	24 hours	dind	68.009625350917	348	266.9
14	20	24 hours	dind	30.3369681439184	348	266.9
15	22	24 hours	dind	33.2310043419946	348	266.9
16	24	24 hours	dind	59.3285764875842	348	266.9
17	25	24 hours	dind	74.4166626231688	348	266.9
18	26	24 hours	dind	73.7635754795348	348	266.9
19	27	24 hours	dind	53.0689969237206	348	266.9
20	29	24 hours	dind	96.6540318423084	348	266.9
21	30	24 hours	dind	69.2037852890611	348	266.9
22	32	24 hours	dind	71.9422545001124	348	266.9
23	33	24 hours	dind	207.467994217513	348	266.9
24	34	24 hours	dind	207.335390906161	348	266.9
25	35	24 hours	dind	34.0262434128916	348	266.9
26	36	24 hours	dind	44.5203932720676	348	266.9
27	37	24 hours	dind	86.6590099156128	348	266.9
28	38	24 hours	dind	63.6671724348859	348	266.9
29	40	24 hours	dind	40.8558801111321	348	266.9
30	41	24 hours	dind	49.9110905488554	348	266.9
31	42	24 hours	dind	45.6529573129413	348	266.9
32	43	24 hours	dind	51.1010525024079	348	266.9
33	47	24 hours	dind	75.5184848289632	348	266.9
34	48	24 hours	dind	69.0933241266604	348	266.9
35	49	24 hours	dind	78.1854581059906	348	266.9
36	50	24 hours	dind	54.9703079505946	348	266.9
37	51	24 hours	dind	49.4159027737703	348	266.9
38	52	24 hours	dind	82.9770714569993	348	266.9
39	53	24 hours	dind	53.8277403937798	348	266.9
40	55	24 hours	dind	136.928960936263	348	266.9
41	56	24 hours	dind	78.5570206664897	348	266.9
42	57	24 hours	dind	24.2734101745348	348	266.9
43	58	24 hours	dind	37.4705969758724	348	266.9
44	59	24 hours	dind	75.7237037804278	348	266.9
45	2	1 week	dind	38.7564651635562	348	266.9
46	4	1 week	dind	67.7983623365656	348	266.9
47	5	1 week	dind	166.386818465993	348	266.9
48	11	1 week	dind	162.142298185801	348	266.9
49	14	1 week	dind	74.0826129410427	348	266.9
50	15	1 week	dind	64.5665940082681	348	266.9
51	16	1 week	dind	75.0451768055844	348	266.9
52	17	1 week	dind	42.5788341152524	348	266.9
53	18	1 week	dind	187.809289058859	348	266.9
54	19	1 week	dind	134.889801267043	348	266.9
55	20	1 week	dind	87.5371200395886	348	266.9
56	21	1 week	dind	45.3253759649675	348	266.9
57	22	1 week	dind	100.577922789451	348	266.9
58	23	1 week	dind	115.557026326182	348	266.9
59	24	1 week	dind	239.8368628727	348	266.9
60	25	1 week	dind	154.953625087519	348	266.9
61	27	1 week	dind	39.4353233333211	348	266.9
62	28	1 week	dind	44.7851042203447	348	266.9
63	29	1 week	dind	72.7709253280741	348	266.9
64	33	1 week	dind	45.1540974554079	348	266.9
65	34	1 week	dind	65.1451545336739	348	266.9
66	36	1 week	dind	204.689771950539	348	266.9
67	37	1 week	dind	217.984591896773	348	266.9
68	38	1 week	dind	118.98306086533	348	266.9
69	39	1 week	dind	61.6003242134344	348	266.9
70	40	1 week	dind	80.6091097842491	348	266.9
71	41	1 week	dind	144.707865809817	348	266.9
72	42	1 week	dind	65.4261719330196	348	266.9
73	46	1 week	dind	75.1670618435807	348	266.9
74	47	1 week	dind	53.3499808993329	348	266.9
75	48	1 week	dind	68.8263824525144	348	266.9
76	50	1 week	dind	44.8570251578779	348	266.9
77	51	1 week	dind	120.19203108279	348	266.9
78	52	1 week	dind	65.3846523793841	348	266.9
79	54	1 week	dind	77.0728944351194	348	266.9
80	55	1 week	dind	43.7504609387727	348	266.9
81	57	1 week	dind	58.9127791480598	348	266.9
82	59	1 week	dind	220.117352184022	348	266.9
83	60	1 week	dind	71.8015320970924	348	266.9
84	61	1 week	dind	52.757044009021	348	266.9
85	63	1 week	dind	188.823463879738	348	266.9
86	64	1 week	dind	46.4414951404412	348	266.9
87	65	1 week	dind	103.571583574363	348	266.9
88	1	1 month	dind	128.118156056014	348	266.9
89	3	1 month	dind	183.517308432308	348	266.9
90	4	1 month	dind	214.42094416081	348	266.9
91	5	1 month	dind	179.865812404343	348	266.9
92	6	1 month	dind	347.716827247065	348	266.9
93	7	1 month	dind	265.926053671134	348	266.9
94	8	1 month	dind	267.874571186153	348	266.9
95	9	1 month	dind	155.806484028132	348	266.9
96	10	1 month	dind	335.497145167599	348	266.9
97	11	1 month	dind	91.5712849080704	348	266.9
98	12	1 month	dind	162.94933008499	348	266.9
99	13	1 month	dind	404.905506990457	348	266.9
100	14	1 month	dind	104.525081563939	348	266.9
101	16	1 month	dind	153.459209670307	348	266.9
102	19	1 month	dind	209.662476981983	348	266.9
103	20	1 month	dind	297.163263634797	348	266.9
104	21	1 month	dind	469.300590254523	348	266.9
105	22	1 month	dind	259.593501928986	348	266.9
106	24	1 month	dind	32.0479393850112	348	266.9
107	25	1 month	dind	253.432347330316	348	266.9
108	26	1 month	dind	312.119939269716	348	266.9
109	27	1 month	dind	300.808514749923	348	266.9
110	28	1 month	dind	167.45300370865	348	266.9
111	29	1 month	dind	65.6152548293985	348	266.9
112	30	1 month	dind	141.318744448557	348	266.9
113	31	1 month	dind	447.103125889748	348	266.9
114	32	1 month	dind	225.167567677232	348	266.9
115	33	1 month	dind	111.333246252074	348	266.9
116	35	1 month	dind	113.194258861421	348	266.9
117	39	1 month	dind	144.754605486255	348	266.9
118	40	1 month	dind	107.659846495724	348	266.9
119	41	1 month	dind	116.050346338103	348	266.9
120	42	1 month	dind	211.040429790704	348	266.9
121	43	1 month	dind	165.641612903656	348	266.9
122	44	1 month	dind	293.51249855583	348	266.9
123	45	1 month	dind	247.059502803956	348	266.9
124	46	1 month	dind	54.5368138841421	348	266.9
125	47	1 month	dind	139.161775794483	348	266.9
126	48	1 month	dind	163.361155568685	348	266.9
127	49	1 month	dind	82.9752781585074	348	266.9
128	50	1 month	dind	277.659321353154	348	266.9
129	51	1 month	dind	195.483232849402	348	266.9
130	52	1 month	dind	105.03125766949	348	266.9
131	1	24 hours	dgist	74.7916391243348	270	NA
132	2	24 hours	dgist	117.398448013483	270	NA
133	3	24 hours	dgist	98.1898072218054	270	NA
134	4	24 hours	dgist	107.688800949786	270	NA
135	6	24 hours	dgist	55.7036582641852	270	NA
136	7	24 hours	dgist	31.2940874987695	270	NA
137	9	24 hours	dgist	87.8623620452524	270	NA
138	11	24 hours	dgist	98.1787751031985	270	NA
139	15	24 hours	dgist	162.018645360855	270	NA
140	16	24 hours	dgist	152.231276913123	270	NA
141	17	24 hours	dgist	109.996865530342	270	NA
142	18	24 hours	dgist	74.8511474634676	270	NA
143	19	24 hours	dgist	40.638065578082	270	NA
144	20	24 hours	dgist	19.8460813526196	270	NA
145	22	24 hours	dgist	6.70571058350985	270	NA
146	24	24 hours	dgist	117.555086603253	270	NA
147	25	24 hours	dgist	104.658798035387	270	NA
148	26	24 hours	dgist	146.040054058435	270	NA
149	27	24 hours	dgist	110.564989045536	270	NA
150	29	24 hours	dgist	112.926941726728	270	NA
151	30	24 hours	dgist	174.730869253231	270	NA
152	32	24 hours	dgist	103.20591313904	270	NA
153	33	24 hours	dgist	40.0319574700379	270	NA
154	34	24 hours	dgist	133.844303212	270	NA
155	35	24 hours	dgist	69.5192148311531	270	NA
156	36	24 hours	dgist	43.6965491667791	270	NA
157	37	24 hours	dgist	139.358780844439	270	NA
158	38	24 hours	dgist	55.3146040445021	270	NA
159	40	24 hours	dgist	69.2493176417084	270	NA
160	41	24 hours	dgist	148.631074650603	270	NA
161	42	24 hours	dgist	87.925487221672	270	NA
162	43	24 hours	dgist	104.45958088253	270	NA
163	47	24 hours	dgist	110.463538144245	270	NA
164	48	24 hours	dgist	79.6225547341866	270	NA
165	49	24 hours	dgist	62.5434037250487	270	NA
166	50	24 hours	dgist	102.931103334994	270	NA
167	51	24 hours	dgist	24.9403874365026	270	NA
168	52	24 hours	dgist	76.6494063035114	270	NA
169	53	24 hours	dgist	178.333007265547	270	NA
170	55	24 hours	dgist	251.039230820273	270	NA
171	56	24 hours	dgist	215.333105608777	270	NA
172	57	24 hours	dgist	56.3538857463009	270	NA
173	58	24 hours	dgist	95.0030180959186	270	NA
174	59	24 hours	dgist	63.8527320754596	270	NA
175	2	1 week	dgist	110.716786575004	270	NA
176	4	1 week	dgist	144.890770617814	270	NA
177	5	1 week	dgist	108.398389365918	270	NA
178	11	1 week	dgist	167.725471372168	270	NA
179	14	1 week	dgist	141.611806531991	270	NA
180	15	1 week	dgist	172.36261159179	270	NA
181	16	1 week	dgist	111.334418415256	270	NA
182	17	1 week	dgist	26.7721395013108	270	NA
183	18	1 week	dgist	48.8721790502354	270	NA
184	19	1 week	dgist	142.196673012354	270	NA
185	20	1 week	dgist	60.1462807677781	270	NA
186	21	1 week	dgist	61.0475353835226	270	NA
187	22	1 week	dgist	219.317136006061	270	NA
188	23	1 week	dgist	68.4980440007462	270	NA
189	24	1 week	dgist	168.086854195839	270	NA
190	25	1 week	dgist	145.23061943796	270	NA
191	27	1 week	dgist	83.0353418912544	270	NA
192	28	1 week	dgist	81.306389228078	270	NA
193	29	1 week	dgist	144.845461403088	270	NA
194	33	1 week	dgist	27.2041394368777	270	NA
195	34	1 week	dgist	86.8311627214937	270	NA
196	36	1 week	dgist	101.26260431482	270	NA
197	37	1 week	dgist	52.6887043907925	270	NA
198	38	1 week	dgist	94.6863762839559	270	NA
199	39	1 week	dgist	40.5244399269263	270	NA
200	40	1 week	dgist	172.470514305242	270	NA
201	41	1 week	dgist	144.888615717822	270	NA
202	42	1 week	dgist	146.145195294866	270	NA
203	46	1 week	dgist	41.1401895893703	270	NA
204	47	1 week	dgist	55.7410282657531	270	NA
205	48	1 week	dgist	231.759772676154	270	NA
206	50	1 week	dgist	61.2072131264538	270	NA
207	51	1 week	dgist	168.407484506104	270	NA
208	52	1 week	dgist	112.370541184373	270	NA
209	54	1 week	dgist	160.903169697757	270	NA
210	55	1 week	dgist	133.110893680973	270	NA
211	57	1 week	dgist	91.1396308622497	270	NA
212	59	1 week	dgist	84.586233325472	270	NA
213	60	1 week	dgist	81.8993904675894	270	NA
214	61	1 week	dgist	31.2704946900731	270	NA
215	63	1 week	dgist	276.904316525261	270	NA
216	64	1 week	dgist	222.920352703291	270	NA
217	65	1 week	dgist	113.056813484294	270	NA
218	1	1 month	dgist	182.94265425748	270	NA
219	3	1 month	dgist	119.647134417669	270	NA
220	4	1 month	dgist	210.239988403404	270	NA
221	5	1 month	dgist	93.3000342140621	270	NA
222	6	1 month	dgist	61.8546718441018	270	NA
223	7	1 month	dgist	129.2806319522	270	NA
224	8	1 month	dgist	102.262725568791	270	NA
225	9	1 month	dgist	90.1035118029249	270	NA
226	10	1 month	dgist	139.387960989789	270	NA
227	11	1 month	dgist	95.7390749159718	270	NA
228	12	1 month	dgist	140.377261042349	270	NA
229	13	1 month	dgist	121.290509425358	270	NA
230	14	1 month	dgist	64.3079851116781	270	NA
231	16	1 month	dgist	64.7274710968549	270	NA
232	19	1 month	dgist	130.570076930711	270	NA
233	20	1 month	dgist	99.1976720899121	270	NA
234	21	1 month	dgist	105.893472760648	270	NA
235	22	1 month	dgist	229.200680422184	270	NA
236	24	1 month	dgist	64.324217181733	270	NA
237	25	1 month	dgist	93.7564513115946	270	NA
238	26	1 month	dgist	140.802452930363	270	NA
239	27	1 month	dgist	89.363038822476	270	NA
240	28	1 month	dgist	66.0847277756745	270	NA
241	29	1 month	dgist	156.129003743061	270	NA
242	30	1 month	dgist	141.652637777392	270	NA
243	31	1 month	dgist	115.798000225163	270	NA
244	32	1 month	dgist	121.275957032618	270	NA
245	33	1 month	dgist	62.1250875750853	270	NA
246	35	1 month	dgist	94.4691342961421	270	NA
247	39	1 month	dgist	114.429179745342	270	NA
248	40	1 month	dgist	122.644991632106	270	NA
249	41	1 month	dgist	90.3832390703773	270	NA
250	42	1 month	dgist	126.332833898894	270	NA
251	43	1 month	dgist	66.0602414617162	270	NA
252	44	1 month	dgist	155.307425661896	270	NA
253	45	1 month	dgist	217.885002209637	270	NA
254	46	1 month	dgist	98.5516828139019	270	NA
255	47	1 month	dgist	63.6384703294338	270	NA
256	48	1 month	dgist	276.356998379728	270	NA
257	49	1 month	dgist	127.361720843689	270	NA
258	50	1 month	dgist	34.4466692899852	270	NA
259	51	1 month	dgist	245.351396980642	270	NA
260	52	1 month	dgist	153.117802238579	270	NA
