# Supplementary material for: Tracking the relation between gist and item memory over the course of long-term memory consolidation
Source: eLife journal article supplement (doi:10.7554/elife.65588), 2021-07-14
Supplement: supp [file elife-65588-supp-v2.zip › elife_poa_e65588_Figure_2_figure_supplement_1_source_data_2.csv]

	ID	group	memoryType	error	chance	chance2
1	1	24 hours	dind	39.9538340678982	348	266.9
2	2	24 hours	dind	53.5488070910666	348	266.9
3	3	24 hours	dind	20.9180637734449	348	266.9
4	4	24 hours	dind	49.5191186335563	348	266.9
5	6	24 hours	dind	41.7661834435703	348	266.9
6	7	24 hours	dind	49.1747670179487	348	266.9
7	9	24 hours	dind	64.1476090460012	348	266.9
8	11	24 hours	dind	35.127140737987	348	266.9
9	15	24 hours	dind	56.9950803178358	348	266.9
10	16	24 hours	dind	42.7263405651103	348	266.9
11	17	24 hours	dind	35.189921351369	348	266.9
12	18	24 hours	dind	42.2107020613623	348	266.9
13	19	24 hours	dind	41.8317261159757	348	266.9
14	20	24 hours	dind	53.3686342239139	348	266.9
15	22	24 hours	dind	33.2569707445477	348	266.9
16	24	24 hours	dind	36.3108610463454	348	266.9
17	25	24 hours	dind	57.7070779405308	348	266.9
18	26	24 hours	dind	58.6975669522047	348	266.9
19	27	24 hours	dind	32.603950476446	348	266.9
20	29	24 hours	dind	49.816985301826	348	266.9
21	30	24 hours	dind	37.6438610906116	348	266.9
22	32	24 hours	dind	33.4136954413279	348	266.9
23	33	24 hours	dind	33.327651308533	348	266.9
24	34	24 hours	dind	15.2209602080624	348	266.9
25	35	24 hours	dind	25.3364835564966	348	266.9
26	36	24 hours	dind	49.0438791322473	348	266.9
27	37	24 hours	dind	50.077433789319	348	266.9
28	38	24 hours	dind	27.2909907766593	348	266.9
29	40	24 hours	dind	27.7339498979992	348	266.9
30	41	24 hours	dind	63.9816978975797	348	266.9
31	42	24 hours	dind	45.0025901888373	348	266.9
32	43	24 hours	dind	59.0310868217306	348	266.9
33	47	24 hours	dind	74.329947661833	348	266.9
34	48	24 hours	dind	66.6396612640314	348	266.9
35	49	24 hours	dind	47.8398944789853	348	266.9
36	50	24 hours	dind	41.9953953401194	348	266.9
37	51	24 hours	dind	46.5222575474146	348	266.9
38	52	24 hours	dind	39.7718935713191	348	266.9
39	53	24 hours	dind	55.0066141120612	348	266.9
40	55	24 hours	dind	78.1604075355235	348	266.9
41	56	24 hours	dind	49.336608885209	348	266.9
42	57	24 hours	dind	24.4430173436716	348	266.9
43	58	24 hours	dind	40.0067046233261	348	266.9
44	59	24 hours	dind	14.804509443287	348	266.9
45	2	1 week	dind	31.8482335458946	348	266.9
46	4	1 week	dind	38.8183615888985	348	266.9
47	5	1 week	dind	29.3547818990153	348	266.9
48	11	1 week	dind	26.9176884527248	348	266.9
49	14	1 week	dind	45.6414630389429	348	266.9
50	15	1 week	dind	64.0066185532292	348	266.9
51	16	1 week	dind	62.2057793953695	348	266.9
52	17	1 week	dind	35.4188288512381	348	266.9
53	18	1 week	dind	27.1658175729927	348	266.9
54	19	1 week	dind	53.6366618463791	348	266.9
55	20	1 week	dind	49.2307986804941	348	266.9
56	21	1 week	dind	22.9422566889299	348	266.9
57	22	1 week	dind	30.9189809392882	348	266.9
58	23	1 week	dind	34.6395732549431	348	266.9
59	24	1 week	dind	44.2116455868285	348	266.9
60	25	1 week	dind	34.56036377811	348	266.9
61	27	1 week	dind	20.4571707823902	348	266.9
62	28	1 week	dind	28.8865899176761	348	266.9
63	29	1 week	dind	33.377940298529	348	266.9
64	33	1 week	dind	62.0737486649267	348	266.9
65	34	1 week	dind	56.5279575768123	348	266.9
66	36	1 week	dind	49.0154317317759	348	266.9
67	37	1 week	dind	52.0036466269349	348	266.9
68	38	1 week	dind	38.031566911451	348	266.9
69	39	1 week	dind	50.4540511561745	348	266.9
70	40	1 week	dind	57.0954732863302	348	266.9
71	41	1 week	dind	51.1089779480957	348	266.9
72	42	1 week	dind	31.4540368574249	348	266.9
73	46	1 week	dind	66.5765880786461	348	266.9
74	47	1 week	dind	50.9678335998855	348	266.9
75	48	1 week	dind	44.6179421337473	348	266.9
76	50	1 week	dind	34.8719150717789	348	266.9
77	51	1 week	dind	25.2231120731825	348	266.9
78	52	1 week	dind	41.6994607062912	348	266.9
79	54	1 week	dind	48.1742618179609	348	266.9
80	55	1 week	dind	33.7421849521156	348	266.9
81	57	1 week	dind	18.7658693975124	348	266.9
82	59	1 week	dind	52.7830561426997	348	266.9
83	60	1 week	dind	39.3099684760011	348	266.9
84	61	1 week	dind	40.7991119308501	348	266.9
85	63	1 week	dind	44.5296042378487	348	266.9
86	64	1 week	dind	33.943420784266	348	266.9
87	65	1 week	dind	58.1441249360116	348	266.9
88	1	1 month	dind	18.7499852081076	348	266.9
89	3	1 month	dind	48.4785030166448	348	266.9
90	4	1 month	dind	49.774800547933	348	266.9
91	5	1 month	dind	50.2987005505934	348	266.9
92	6	1 month	dind	30.6096724144731	348	266.9
93	7	1 month	dind	40.0044009458454	348	266.9
94	8	1 month	dind	58.3252030492188	348	266.9
95	9	1 month	dind	33.7043623068996	348	266.9
96	10	1 month	dind	56.3381074382938	348	266.9
97	11	1 month	dind	38.4252127542678	348	266.9
98	12	1 month	dind	36.6946066350081	348	266.9
99	13	1 month	dind	34.8451436023274	348	266.9
100	14	1 month	dind	34.5258175928457	348	266.9
101	16	1 month	dind	38.2397130141978	348	266.9
102	19	1 month	dind	59.2344275257641	348	266.9
103	20	1 month	dind	104.266732046775	348	266.9
104	21	1 month	dind	48.8220985887746	348	266.9
105	22	1 month	dind	45.9022483541717	348	266.9
106	24	1 month	dind	41.1918956148509	348	266.9
107	25	1 month	dind	40.2715349035366	348	266.9
108	26	1 month	dind	50.3931949419688	348	266.9
109	27	1 month	dind	35.2815094135797	348	266.9
110	28	1 month	dind	22.6432016909845	348	266.9
111	29	1 month	dind	49.2002540464459	348	266.9
112	30	1 month	dind	43.1221697538592	348	266.9
113	31	1 month	dind	51.5627711116557	348	266.9
114	32	1 month	dind	54.8477953843984	348	266.9
115	33	1 month	dind	55.6610315194803	348	266.9
116	35	1 month	dind	36.9065590191899	348	266.9
117	39	1 month	dind	47.6504734176385	348	266.9
118	40	1 month	dind	41.4447638886764	348	266.9
119	41	1 month	dind	33.1374786898204	348	266.9
120	42	1 month	dind	37.1606974460098	348	266.9
121	43	1 month	dind	37.9052758821969	348	266.9
122	44	1 month	dind	58.5264729940282	348	266.9
123	45	1 month	dind	41.2648356603548	348	266.9
124	46	1 month	dind	28.2106839801522	348	266.9
125	47	1 month	dind	46.5283730212646	348	266.9
126	48	1 month	dind	30.6228262674884	348	266.9
127	49	1 month	dind	63.8607530051765	348	266.9
128	50	1 month	dind	37.6502733782002	348	266.9
129	51	1 month	dind	48.5849884673723	348	266.9
130	52	1 month	dind	31.0847197638826	348	266.9
131	1	24 hours	dgist	71.8652575390688	270	NA
132	2	24 hours	dgist	91.7451500253196	270	NA
133	3	24 hours	dgist	154.483574815458	270	NA
134	4	24 hours	dgist	98.5635040969571	270	NA
135	6	24 hours	dgist	89.6055516332033	270	NA
136	7	24 hours	dgist	46.301775533871	270	NA
137	9	24 hours	dgist	85.5410253937709	270	NA
138	11	24 hours	dgist	86.6788138655526	270	NA
139	15	24 hours	dgist	127.88974416848	270	NA
140	16	24 hours	dgist	90.8176856792311	270	NA
141	17	24 hours	dgist	33.532430358823	270	NA
142	18	24 hours	dgist	81.1764666354688	270	NA
143	19	24 hours	dgist	94.0799485784002	270	NA
144	20	24 hours	dgist	51.4138933502395	270	NA
145	22	24 hours	dgist	72.8118560573352	270	NA
146	24	24 hours	dgist	153.675794577204	270	NA
147	25	24 hours	dgist	52.3561729434329	270	NA
148	26	24 hours	dgist	117.625358974672	270	NA
149	27	24 hours	dgist	121.039991518424	270	NA
150	29	24 hours	dgist	86.8695406020914	270	NA
151	30	24 hours	dgist	139.981291862154	270	NA
152	32	24 hours	dgist	128.060209802509	270	NA
153	33	24 hours	dgist	43.6261156019058	270	NA
154	34	24 hours	dgist	106.087509676385	270	NA
155	35	24 hours	dgist	97.9821386430666	270	NA
156	36	24 hours	dgist	16.6046486612686	270	NA
157	37	24 hours	dgist	144.090149764733	270	NA
158	38	24 hours	dgist	51.4904061345018	270	NA
159	40	24 hours	dgist	85.5579649493766	270	NA
160	41	24 hours	dgist	110.280691044845	270	NA
161	42	24 hours	dgist	104.096126180495	270	NA
162	43	24 hours	dgist	100.306219490742	270	NA
163	47	24 hours	dgist	100.464471545895	270	NA
164	48	24 hours	dgist	91.7321108067541	270	NA
165	49	24 hours	dgist	46.7188243217543	270	NA
166	50	24 hours	dgist	119.634887230022	270	NA
167	51	24 hours	dgist	53.1477226859586	270	NA
168	52	24 hours	dgist	96.645977954574	270	NA
169	53	24 hours	dgist	26.2853173732079	270	NA
170	55	24 hours	dgist	97.5792137903099	270	NA
171	56	24 hours	dgist	134.673088556392	270	NA
172	57	24 hours	dgist	41.2902637580825	270	NA
173	58	24 hours	dgist	40.5907505576028	270	NA
174	59	24 hours	dgist	50.2272318833017	270	NA
175	2	1 week	dgist	136.987869084503	270	NA
176	4	1 week	dgist	115.190646106469	270	NA
177	5	1 week	dgist	115.608760392097	270	NA
178	11	1 week	dgist	142.832533873817	270	NA
179	14	1 week	dgist	103.469884163358	270	NA
180	15	1 week	dgist	101.412002309938	270	NA
181	16	1 week	dgist	97.9879954850715	270	NA
182	17	1 week	dgist	69.0840233069285	270	NA
183	18	1 week	dgist	88.1559830786668	270	NA
184	19	1 week	dgist	134.4793894188	270	NA
185	20	1 week	dgist	92.1858188718684	270	NA
186	21	1 week	dgist	22.2712621168796	270	NA
187	22	1 week	dgist	64.1958649494335	270	NA
188	23	1 week	dgist	139.873679935036	270	NA
189	24	1 week	dgist	177.839247924874	270	NA
190	25	1 week	dgist	137.956575708725	270	NA
191	27	1 week	dgist	68.2232186944998	270	NA
192	28	1 week	dgist	58.0796169440251	270	NA
193	29	1 week	dgist	111.723529438971	270	NA
194	33	1 week	dgist	138.493500803018	270	NA
195	34	1 week	dgist	84.0147421278106	270	NA
196	36	1 week	dgist	144.076269285129	270	NA
197	37	1 week	dgist	69.8992006463857	270	NA
198	38	1 week	dgist	88.0637399372437	270	NA
199	39	1 week	dgist	75.8298571673688	270	NA
200	40	1 week	dgist	187.544606840394	270	NA
201	41	1 week	dgist	118.35272609499	270	NA
202	42	1 week	dgist	49.5479159337212	270	NA
203	46	1 week	dgist	48.5085492721109	270	NA
204	47	1 week	dgist	43.9492084114116	270	NA
205	48	1 week	dgist	44.6284848706705	270	NA
206	50	1 week	dgist	20.2912811514221	270	NA
207	51	1 week	dgist	107.548546440091	270	NA
208	52	1 week	dgist	123.089512047705	270	NA
209	54	1 week	dgist	184.302074543553	270	NA
210	55	1 week	dgist	124.574071485871	270	NA
211	57	1 week	dgist	57.255779627985	270	NA
212	59	1 week	dgist	93.539698459278	270	NA
213	60	1 week	dgist	170.714158866041	270	NA
214	61	1 week	dgist	111.894428709091	270	NA
215	63	1 week	dgist	185.437516132499	270	NA
216	64	1 week	dgist	96.1303338361094	270	NA
217	65	1 week	dgist	50.9596216928389	270	NA
218	1	1 month	dgist	43.2884915472234	270	NA
219	3	1 month	dgist	102.630954864453	270	NA
220	4	1 month	dgist	87.5168762014672	270	NA
221	5	1 month	dgist	53.93562833275	270	NA
222	6	1 month	dgist	49.7598873432624	270	NA
223	7	1 month	dgist	58.5326460616214	270	NA
224	8	1 month	dgist	136.785744157625	270	NA
225	9	1 month	dgist	69.9395400874637	270	NA
226	10	1 month	dgist	142.889842258778	270	NA
227	11	1 month	dgist	109.398875843001	270	NA
228	12	1 month	dgist	137.062879483092	270	NA
229	13	1 month	dgist	61.1532380818861	270	NA
230	14	1 month	dgist	32.3669506328997	270	NA
231	16	1 month	dgist	79.8918621457285	270	NA
232	19	1 month	dgist	119.624813882667	270	NA
233	20	1 month	dgist	78.0186057220516	270	NA
234	21	1 month	dgist	116.315350531709	270	NA
235	22	1 month	dgist	79.5686092370237	270	NA
236	24	1 month	dgist	21.6206741073272	270	NA
237	25	1 month	dgist	74.104526184657	270	NA
238	26	1 month	dgist	78.9256801164149	270	NA
239	27	1 month	dgist	87.7364096217186	270	NA
240	28	1 month	dgist	23.1265850268547	270	NA
241	29	1 month	dgist	183.042034433332	270	NA
242	30	1 month	dgist	138.732020046917	270	NA
243	31	1 month	dgist	96.3867135346306	270	NA
244	32	1 month	dgist	119.721101555493	270	NA
245	33	1 month	dgist	80.7471230240108	270	NA
246	35	1 month	dgist	78.8762591047056	270	NA
247	39	1 month	dgist	111.147127614325	270	NA
248	40	1 month	dgist	67.4516094800294	270	NA
249	41	1 month	dgist	52.2670734422126	270	NA
250	42	1 month	dgist	100.46310089878	270	NA
251	43	1 month	dgist	40.3216233502254	270	NA
252	44	1 month	dgist	122.125389394375	270	NA
253	45	1 month	dgist	170.942932084748	270	NA
254	46	1 month	dgist	129.27763743808	270	NA
255	47	1 month	dgist	59.3699509714769	270	NA
256	48	1 month	dgist	69.0406573138742	270	NA
257	49	1 month	dgist	97.7846922346618	270	NA
258	50	1 month	dgist	42.9367049265617	270	NA
259	51	1 month	dgist	109.509289615037	270	NA
260	52	1 month	dgist	100.188590766383	270	NA
