# Supplementary material for: Tracking the relation between gist and item memory over the course of long-term memory consolidation
Source: eLife journal article supplement (doi:10.7554/elife.65588), 2021-07-14
Supplement: supp [file elife-65588-supp-v2.zip › elife_poa_e65588_Figure_2_figure_supplement_2_source_data_1.csv]

	ID	group	gistMemoryType	errorChange
1	1	24 hours	dgist	2.92638158526599
2	2	24 hours	dgist	25.6532979881634
3	3	24 hours	dgist	-56.2937675936526
4	4	24 hours	dgist	9.1252968528289
5	6	24 hours	dgist	-33.9018933690181
6	7	24 hours	dgist	-15.0076880351015
7	9	24 hours	dgist	2.3213366514815
8	11	24 hours	dgist	11.4999612376459
9	15	24 hours	dgist	34.128901192375
10	16	24 hours	dgist	61.4135912338919
11	17	24 hours	dgist	76.464435171519
12	18	24 hours	dgist	-6.3253191720012
13	19	24 hours	dgist	-53.4418830003182
14	20	24 hours	dgist	-31.5678119976199
15	22	24 hours	dgist	-66.1061454738254
16	24	24 hours	dgist	-36.120707973951
17	25	24 hours	dgist	52.3026250919541
18	26	24 hours	dgist	28.414695083763
19	27	24 hours	dgist	-10.475002472888
20	29	24 hours	dgist	26.0574011246366
21	30	24 hours	dgist	34.749577391077
22	32	24 hours	dgist	-24.854296663469
23	33	24 hours	dgist	-3.5941581318679
24	34	24 hours	dgist	27.756793535615
25	35	24 hours	dgist	-28.4629238119135
26	36	24 hours	dgist	27.0919005055105
27	37	24 hours	dgist	-4.73136892029402
28	38	24 hours	dgist	3.8241979100003
29	40	24 hours	dgist	-16.3086473076682
30	41	24 hours	dgist	38.350383605758
31	42	24 hours	dgist	-16.170638958823
32	43	24 hours	dgist	4.15336139178801
33	47	24 hours	dgist	9.99906659835001
34	48	24 hours	dgist	-12.1095560725675
35	49	24 hours	dgist	15.8245794032944
36	50	24 hours	dgist	-16.703783895028
37	51	24 hours	dgist	-28.207335249456
38	52	24 hours	dgist	-19.9965716510626
39	53	24 hours	dgist	152.047689892339
40	55	24 hours	dgist	153.460017029963
41	56	24 hours	dgist	80.660017052385
42	57	24 hours	dgist	15.0636219882184
43	58	24 hours	dgist	54.4122675383158
44	59	24 hours	dgist	13.6255001921579
45	2	1 week	dgist	-26.271082509499
46	4	1 week	dgist	29.700124511345
47	5	1 week	dgist	-7.21037102617899
48	11	1 week	dgist	24.892937498351
49	14	1 week	dgist	38.141922368633
50	15	1 week	dgist	70.950609281852
51	16	1 week	dgist	13.3464229301845
52	17	1 week	dgist	-42.3118838056177
53	18	1 week	dgist	-39.2838040284314
54	19	1 week	dgist	7.71728359355401
55	20	1 week	dgist	-32.0395381040903
56	21	1 week	dgist	38.776273266643
57	22	1 week	dgist	155.121271056628
58	23	1 week	dgist	-71.3756359342898
59	24	1 week	dgist	-9.75239372903499
60	25	1 week	dgist	7.27404372923499
61	27	1 week	dgist	14.8121231967546
62	28	1 week	dgist	23.2267722840529
63	29	1 week	dgist	33.121931964117
64	33	1 week	dgist	-111.28936136614
65	34	1 week	dgist	2.81642059368309
66	36	1 week	dgist	-42.813664970309
67	37	1 week	dgist	-17.2104962555932
68	38	1 week	dgist	6.6226363467122
69	39	1 week	dgist	-35.3054172404425
70	40	1 week	dgist	-15.074092535152
71	41	1 week	dgist	26.535889622832
72	42	1 week	dgist	96.5972793611448
73	46	1 week	dgist	-7.3683596827406
74	47	1 week	dgist	11.7918198543415
75	48	1 week	dgist	187.131287805484
76	50	1 week	dgist	40.9159319750317
77	51	1 week	dgist	60.858938066013
78	52	1 week	dgist	-10.718970863332
79	54	1 week	dgist	-23.398904845796
80	55	1 week	dgist	8.53682219510199
81	57	1 week	dgist	33.8838512342647
82	59	1 week	dgist	-8.95346513380601
83	60	1 week	dgist	-88.8147683984516
84	61	1 week	dgist	-80.6239340190179
85	63	1 week	dgist	91.466800392762
86	64	1 week	dgist	126.790018867182
87	65	1 week	dgist	62.0971917914551
88	1	1 month	dgist	139.654162710257
89	3	1 month	dgist	17.016179553216
90	4	1 month	dgist	122.723112201937
91	5	1 month	dgist	39.3644058813121
92	6	1 month	dgist	12.0947845008394
93	7	1 month	dgist	70.7479858905786
94	8	1 month	dgist	-34.523018588834
95	9	1 month	dgist	20.1639717154612
96	10	1 month	dgist	-3.501881268989
97	11	1 month	dgist	-13.6598009270292
98	12	1 month	dgist	3.31438155925701
99	13	1 month	dgist	60.1372713434719
100	14	1 month	dgist	31.9410344787784
101	16	1 month	dgist	-15.1643910488736
102	19	1 month	dgist	10.945263048044
103	20	1 month	dgist	21.1790663678605
104	21	1 month	dgist	-10.421877771061
105	22	1 month	dgist	149.63207118516
106	24	1 month	dgist	42.7035430744058
107	25	1 month	dgist	19.6519251269376
108	26	1 month	dgist	61.8767728139481
109	27	1 month	dgist	1.62662920075741
110	28	1 month	dgist	42.9581427488198
111	29	1 month	dgist	-26.913030690271
112	30	1 month	dgist	2.92061773047499
113	31	1 month	dgist	19.4112866905324
114	32	1 month	dgist	1.554855477125
115	33	1 month	dgist	-18.6220354489255
116	35	1 month	dgist	15.5928751914365
117	39	1 month	dgist	3.282052131017
118	40	1 month	dgist	55.1933821520766
119	41	1 month	dgist	38.1161656281647
120	42	1 month	dgist	25.869733000114
121	43	1 month	dgist	25.7386181114908
122	44	1 month	dgist	33.182036267521
123	45	1 month	dgist	46.942070124889
124	46	1 month	dgist	-30.7259546241781
125	47	1 month	dgist	4.2685193579569
126	48	1 month	dgist	207.316341065854
127	49	1 month	dgist	29.5770286090272
128	50	1 month	dgist	-8.4900356365765
129	51	1 month	dgist	135.842107365605
130	52	1 month	dgist	52.929211472196
131	1	24 hours	dindme	10.5876827534242
132	2	24 hours	dindme	21.6881110273618
133	3	24 hours	dindme	16.6371130602714
134	4	24 hours	dindme	20.9134552497509
135	6	24 hours	dindme	-0.835275460092198
136	7	24 hours	dindme	29.5401272149043
137	9	24 hours	dindme	-27.2017533015317
138	11	24 hours	dindme	82.809462601655
139	15	24 hours	dindme	53.6973244629932
140	16	24 hours	dindme	4.8389546004296
141	17	24 hours	dindme	11.6320733482684
142	18	24 hours	dindme	20.8557933743613
143	19	24 hours	dindme	11.3600355511624
144	20	24 hours	dindme	-26.0409147901546
145	22	24 hours	dindme	7.8268645889093
146	24	24 hours	dindme	16.1014657889794
147	25	24 hours	dindme	-6.5411259954719
148	26	24 hours	dindme	19.41668275653
149	27	24 hours	dindme	-7.2030691560861
150	29	24 hours	dindme	60.4542110544218
151	30	24 hours	dindme	33.2290601346391
152	32	24 hours	dindme	37.8981431709723
153	33	24 hours	dindme	18.0335606799396
154	34	24 hours	dindme	31.8841003380325
155	35	24 hours	dindme	0.435887973030201
156	36	24 hours	dindme	-18.9084625050791
157	37	24 hours	dindme	17.0076620538476
158	38	24 hours	dindme	15.1853265719242
159	40	24 hours	dindme	5.89091199083408
160	41	24 hours	dindme	-14.6055574999925
161	42	24 hours	dindme	0.854995561322603
162	43	24 hours	dindme	-15.5695249033381
163	47	24 hours	dindme	-7.8664588356063
164	48	24 hours	dindme	-9.1953183546725
165	49	24 hours	dindme	18.3752430042249
166	50	24 hours	dindme	10.0316187511175
167	51	24 hours	dindme	-22.7595594642736
168	52	24 hours	dindme	46.5580904940373
169	53	24 hours	dindme	-4.8939687292284
170	55	24 hours	dindme	64.0232727965757
171	56	24 hours	dindme	21.4010129378523
172	57	24 hours	dindme	-1.3088890020824
173	58	24 hours	dindme	-8.80802170653406
174	59	24 hours	dindme	39.9406404016819
175	2	1 week	dindme	9.879288685672
176	4	1 week	dindme	-3.7963050741055
177	5	1 week	dindme	52.8811394025562
178	11	1 week	dindme	23.0317896051376
179	14	1 week	dindme	32.0458678588924
180	15	1 week	dindme	-16.6901860607555
181	16	1 week	dindme	26.3231753242444
182	17	1 week	dindme	-12.4224754376704
183	18	1 week	dindme	43.019863381326
184	19	1 week	dindme	11.7051974000296
185	20	1 week	dindme	45.2688672345681
186	21	1 week	dindme	16.9351400548382
187	22	1 week	dindme	70.8187611102261
188	23	1 week	dindme	5.6879615986663
189	24	1 week	dindme	24.4070137840076
190	25	1 week	dindme	95.7292943720467
191	27	1 week	dindme	4.14405027312783
192	28	1 week	dindme	6.5678538611318
193	29	1 week	dindme	31.2748925981393
194	33	1 week	dindme	-20.3650929542636
195	34	1 week	dindme	9.21240480331226
196	36	1 week	dindme	9.5343856774572
197	37	1 week	dindme	36.6151360379862
198	38	1 week	dindme	16.5231373248955
199	39	1 week	dindme	17.8383050534697
200	40	1 week	dindme	11.2638632418883
201	41	1 week	dindme	91.1292367463665
202	42	1 week	dindme	7.96436157226554
203	46	1 week	dindme	0.4583397679611
204	47	1 week	dindme	2.5486146113261
205	48	1 week	dindme	9.6569519383612
206	50	1 week	dindme	-0.964575107745802
207	51	1 week	dindme	72.5324619263568
208	52	1 week	dindme	-7.7085311279382
209	54	1 week	dindme	26.9410039315682
210	55	1 week	dindme	23.3630267615123
211	57	1 week	dindme	21.1695457582635
212	59	1 week	dindme	-26.875508629452
213	60	1 week	dindme	7.4652928999191
214	61	1 week	dindme	2.33064264592401
215	63	1 week	dindme	54.0589886838671
216	64	1 week	dindme	-11.1027371647604
217	65	1 week	dindme	42.4246643868253
218	1	1 month	dindme	96.8101664784145
219	3	1 month	dindme	165.854371754433
220	4	1 month	dindme	34.3484124630079
221	5	1 month	dindme	122.810398948283
222	6	1 month	dindme	31.6129958992334
223	7	1 month	dindme	47.6929865351611
224	8	1 month	dindme	28.571134459359
225	9	1 month	dindme	66.4004229904798
226	10	1 month	dindme	76.1753388581046
227	11	1 month	dindme	25.1228675948245
228	12	1 month	dindme	96.4126903284638
229	13	1 month	dindme	38.6503983638244
230	14	1 month	dindme	34.1572762293818
231	16	1 month	dindme	-2.2712092630087
232	19	1 month	dindme	73.6975836772367
233	20	1 month	dindme	120.547879409291
234	21	1 month	dindme	3.0078560888139
235	22	1 month	dindme	150.47521062615
236	24	1 month	dindme	-2.343524480117
237	25	1 month	dindme	130.489897159015
238	26	1 month	dindme	91.8526003624482
239	27	1 month	dindme	43.2528778615658
240	28	1 month	dindme	19.3267468049965
241	29	1 month	dindme	-14.5385938052265
242	30	1 month	dindme	35.2537117123305
243	31	1 month	dindme	87.6540725647019
244	32	1 month	dindme	102.087764744863
245	33	1 month	dindme	-12.1681441925268
246	35	1 month	dindme	-7.0522987085396
247	39	1 month	dindme	36.8196912544712
248	40	1 month	dindme	22.5171510183503
249	41	1 month	dindme	58.622173703639
250	42	1 month	dindme	115.217310955909
251	43	1 month	dindme	32.2103138637383
252	44	1 month	dindme	84.0368020147711
253	45	1 month	dindme	47.1601192175466
254	46	1 month	dindme	25.2933765847644
255	47	1 month	dindme	21.2843179328168
256	48	1 month	dindme	26.9035825034848
257	49	1 month	dindme	11.3020912318139
258	50	1 month	dindme	51.520411901818
259	51	1 month	dindme	60.0245698892027
260	52	1 month	dindme	41.4648909488321
261	1	24 hours	sim_est_dgist	9.2880984576924
262	2	24 hours	sim_est_dgist	53.4448430913487
263	3	24 hours	sim_est_dgist	10.4845207617251
264	4	24 hours	sim_est_dgist	5.650852281337
265	6	24 hours	sim_est_dgist	7.2165517510158
266	7	24 hours	sim_est_dgist	-0.6322520513664
267	9	24 hours	sim_est_dgist	-4.3107741616314
268	11	24 hours	sim_est_dgist	70.6547949828023
269	15	24 hours	sim_est_dgist	12.2258772594643
270	16	24 hours	sim_est_dgist	30.5128945906582
271	17	24 hours	sim_est_dgist	2.9482280230358
272	18	24 hours	sim_est_dgist	6.0860373163888
273	19	24 hours	sim_est_dgist	12.3042886573075
274	20	24 hours	sim_est_dgist	-8.6838978814887
275	22	24 hours	sim_est_dgist	-0.773612270354802
276	24	24 hours	sim_est_dgist	7.4954247063629
277	25	24 hours	sim_est_dgist	15.7575509153754
278	26	24 hours	sim_est_dgist	6.9606050808269
279	27	24 hours	sim_est_dgist	10.5833005219089
280	29	24 hours	sim_est_dgist	17.3586023833169
281	30	24 hours	sim_est_dgist	13.1620311302751
282	32	24 hours	sim_est_dgist	17.1047752500674
283	33	24 hours	sim_est_dgist	88.9292630296362
284	34	24 hours	sim_est_dgist	128.006915298182
285	35	24 hours	sim_est_dgist	4.8469127259602
286	36	24 hours	sim_est_dgist	-1.3283938322727
287	37	24 hours	sim_est_dgist	15.0581098917882
288	38	24 hours	sim_est_dgist	12.7173510602018
289	40	24 hours	sim_est_dgist	5.8891700780073
290	41	24 hours	sim_est_dgist	-8.0250064848879
291	42	24 hours	sim_est_dgist	-1.5091149292629
292	43	24 hours	sim_est_dgist	-5.3959864345952
293	47	24 hours	sim_est_dgist	1.5768585073244
294	48	24 hours	sim_est_dgist	0.781666262908399
295	49	24 hours	sim_est_dgist	11.4938629604109
296	50	24 hours	sim_est_dgist	7.3585440311792
297	51	24 hours	sim_est_dgist	-0.888380455527699
298	52	24 hours	sim_est_dgist	18.4630298848091
299	53	24 hours	sim_est_dgist	-2.4673773330905
300	55	24 hours	sim_est_dgist	22.0703349185619
301	56	24 hours	sim_est_dgist	12.0320554183015
302	57	24 hours	sim_est_dgist	-0.8460459215662
303	58	24 hours	sim_est_dgist	-2.1643451338492
304	59	24 hours	sim_est_dgist	42.3822773464668
305	2	1 week	sim_est_dgist	3.5212242638007
306	4	1 week	sim_est_dgist	15.8438721064763
307	5	1 week	sim_est_dgist	67.2318147085295
308	11	1 week	sim_est_dgist	60.8178228493283
309	14	1 week	sim_est_dgist	11.359073307327
310	15	1 week	sim_est_dgist	4.0960748082432
311	16	1 week	sim_est_dgist	3.805862935154
312	17	1 week	sim_est_dgist	1.8767366946243
313	18	1 week	sim_est_dgist	79.8656466490601
314	19	1 week	sim_est_dgist	49.9828551439622
315	20	1 week	sim_est_dgist	27.4737142458661
316	21	1 week	sim_est_dgist	11.2738260689975
317	22	1 week	sim_est_dgist	55.836355557574
318	23	1 week	sim_est_dgist	36.2938664164625
319	24	1 week	sim_est_dgist	107.313593319071
320	25	1 week	sim_est_dgist	84.9639087474359
321	27	1 week	sim_est_dgist	10.3381363831003
322	28	1 week	sim_est_dgist	8.6582446201847
323	29	1 week	sim_est_dgist	17.3895836762873
324	33	1 week	sim_est_dgist	-2.6007855153606
325	34	1 week	sim_est_dgist	4.0039166896328
326	36	1 week	sim_est_dgist	73.7558495308322
327	37	1 week	sim_est_dgist	86.046691697804
328	38	1 week	sim_est_dgist	36.4331619200218
329	39	1 week	sim_est_dgist	2.7622375132747
330	40	1 week	sim_est_dgist	4.5234530055511
331	41	1 week	sim_est_dgist	33.2769698568034
332	42	1 week	sim_est_dgist	13.4783636589943
333	46	1 week	sim_est_dgist	6.9951389947846
334	47	1 week	sim_est_dgist	1.3826741893454
335	48	1 week	sim_est_dgist	10.4205229771154
336	50	1 week	sim_est_dgist	6.6772441654888
337	51	1 week	sim_est_dgist	39.5031304025828
338	52	1 week	sim_est_dgist	12.6764085928381
339	54	1 week	sim_est_dgist	18.2066074610777
340	55	1 week	sim_est_dgist	6.4287164202824
341	57	1 week	sim_est_dgist	15.8833956388944
342	59	1 week	sim_est_dgist	77.2175237735424
343	60	1 week	sim_est_dgist	19.1626968437326
344	61	1 week	sim_est_dgist	4.0838495100511
345	63	1 week	sim_est_dgist	64.7532591624351
346	64	1 week	sim_est_dgist	3.1356310215417
347	65	1 week	sim_est_dgist	17.5840044914128
348	1	1 month	sim_est_dgist	56.3995243842653
349	3	1 month	sim_est_dgist	64.6708068334983
350	4	1 month	sim_est_dgist	73.9337801794569
351	5	1 month	sim_est_dgist	76.1085318276802
352	6	1 month	sim_est_dgist	135.752008418889
353	7	1 month	sim_est_dgist	126.193623041824
354	8	1 month	sim_est_dgist	105.789073414869
355	9	1 month	sim_est_dgist	50.4641810677411
356	10	1 month	sim_est_dgist	105.709198439576
357	11	1 month	sim_est_dgist	25.1626390280028
358	12	1 month	sim_est_dgist	78.903776790074
359	13	1 month	sim_est_dgist	181.915461480209
360	14	1 month	sim_est_dgist	46.8295399966412
361	16	1 month	sim_est_dgist	50.389283895847
362	19	1 month	sim_est_dgist	68.0711375043263
363	20	1 month	sim_est_dgist	93.4572336623707
364	21	1 month	sim_est_dgist	209.472443835167
365	22	1 month	sim_est_dgist	135.233279362107
366	24	1 month	sim_est_dgist	-2.568095793962
367	25	1 month	sim_est_dgist	125.14165955917
368	26	1 month	sim_est_dgist	129.327661675289
369	27	1 month	sim_est_dgist	109.837595107959
370	28	1 month	sim_est_dgist	85.5133452523834
371	29	1 month	sim_est_dgist	12.5272048764253
372	30	1 month	sim_est_dgist	48.9425614814221
373	31	1 month	sim_est_dgist	179.9870814655
374	32	1 month	sim_est_dgist	66.4957444213499
375	33	1 month	sim_est_dgist	32.4771614686973
376	35	1 month	sim_est_dgist	31.6243304544699
377	39	1 month	sim_est_dgist	50.5539540176006
378	40	1 month	sim_est_dgist	29.70610890277
379	41	1 month	sim_est_dgist	43.1085971423491
380	42	1 month	sim_est_dgist	90.6119913944843
381	43	1 month	sim_est_dgist	61.7992040675189
382	44	1 month	sim_est_dgist	88.0336289384975
383	45	1 month	sim_est_dgist	83.9756337893501
384	46	1 month	sim_est_dgist	15.1093978429938
385	47	1 month	sim_est_dgist	41.8572952921655
386	48	1 month	sim_est_dgist	58.6640758238128
387	49	1 month	sim_est_dgist	15.3611344618151
388	50	1 month	sim_est_dgist	114.426151160984
389	51	1 month	sim_est_dgist	69.3192056109992
390	52	1 month	sim_est_dgist	30.7020761033152
