# Supplementary material for: Tracking the relation between gist and item memory over the course of long-term memory consolidation
Source: eLife journal article supplement (doi:10.7554/elife.65588), 2021-07-14
Supplement: supp [file elife-65588-supp-v2.zip › elife_poa_e65588_Figure_2_source_data_1.csv]

	ID	group	memoryType	errorChange
1	1	24 hours	dind	11.196969189925
2	2	24 hours	dind	88.3279684263484
3	3	24 hours	dind	13.3622700104413
4	4	24 hours	dind	19.911388221819
5	6	24 hours	dind	15.7024620299469
6	7	24 hours	dind	-0.0986793619474042
7	9	24 hours	dind	-4.82690960593399
8	11	24 hours	dind	90.422410815716
9	15	24 hours	dind	29.6600971997573
10	16	24 hours	dind	46.7862891474305
11	17	24 hours	dind	10.1664300604729
12	18	24 hours	dind	14.1418582559445
13	19	24 hours	dind	26.1778992349413
14	20	24 hours	dind	-23.0316660799955
15	22	24 hours	dind	-0.0259664025531023
16	24	24 hours	dind	23.0177154412388
17	25	24 hours	dind	16.709584682638
18	26	24 hours	dind	15.0660085273301
19	27	24 hours	dind	20.4650464472746
20	29	24 hours	dind	46.8370465404824
21	30	24 hours	dind	31.5599241984495
22	32	24 hours	dind	38.5285590587845
23	33	24 hours	dind	174.14034290898
24	34	24 hours	dind	192.114430698099
25	35	24 hours	dind	8.689759856395
26	36	24 hours	dind	-4.5234858601797
27	37	24 hours	dind	36.5815761262938
28	38	24 hours	dind	36.3761816582266
29	40	24 hours	dind	13.1219302131329
30	41	24 hours	dind	-14.0706073487243
31	42	24 hours	dind	0.650367124103994
32	43	24 hours	dind	-7.93003431932269
33	47	24 hours	dind	1.18853716713019
34	48	24 hours	dind	2.453662862629
35	49	24 hours	dind	30.3455636270053
36	50	24 hours	dind	12.9749126104752
37	51	24 hours	dind	2.8936452263557
38	52	24 hours	dind	43.2051778856802
39	53	24 hours	dind	-1.1788737182814
40	55	24 hours	dind	58.7685534007395
41	56	24 hours	dind	29.2204117812807
42	57	24 hours	dind	-0.1696071691368
43	58	24 hours	dind	-2.5361076474537
44	59	24 hours	dind	60.9191943371408
45	2	1 week	dind	6.9082316176616
46	4	1 week	dind	28.9800007476671
47	5	1 week	dind	137.032036566978
48	11	1 week	dind	135.224609733076
49	14	1 week	dind	28.4411499020998
50	15	1 week	dind	0.559975455038895
51	16	1 week	dind	12.8393974102149
52	17	1 week	dind	7.16000526401429
53	18	1 week	dind	160.643471485866
54	19	1 week	dind	81.2531394206639
55	20	1 week	dind	38.3063213590945
56	21	1 week	dind	22.3831192760376
57	22	1 week	dind	69.6589418501628
58	23	1 week	dind	80.9174530712389
59	24	1 week	dind	195.625217285872
60	25	1 week	dind	120.393261309409
61	27	1 week	dind	18.9781525509309
62	28	1 week	dind	15.8985143026686
63	29	1 week	dind	39.3929850295451
64	33	1 week	dind	-16.9196512095188
65	34	1 week	dind	8.6171969568616
66	36	1 week	dind	155.674340218763
67	37	1 week	dind	165.980945269838
68	38	1 week	dind	80.951493953879
69	39	1 week	dind	11.1462730572599
70	40	1 week	dind	23.5136364979189
71	41	1 week	dind	93.5988878617213
72	42	1 week	dind	33.9721350755947
73	46	1 week	dind	8.5904737649346
74	47	1 week	dind	2.3821472994474
75	48	1 week	dind	24.2084403187671
76	50	1 week	dind	9.985110086099
77	51	1 week	dind	94.9689190096075
78	52	1 week	dind	23.6851916730929
79	54	1 week	dind	28.8986326171585
80	55	1 week	dind	10.0082759866571
81	57	1 week	dind	40.1469097505474
82	59	1 week	dind	167.334296041322
83	60	1 week	dind	32.4915636210913
84	61	1 week	dind	11.9579320781709
85	63	1 week	dind	144.293859641889
86	64	1 week	dind	12.4980743561752
87	65	1 week	dind	45.4274586383514
88	1	1 month	dind	109.368170847906
89	3	1 month	dind	135.038805415663
90	4	1 month	dind	164.646143612877
91	5	1 month	dind	129.56711185375
92	6	1 month	dind	317.107154832592
93	7	1 month	dind	225.921652725289
94	8	1 month	dind	209.549368136934
95	9	1 month	dind	122.102121721232
96	10	1 month	dind	279.159037729305
97	11	1 month	dind	53.1460721538026
98	12	1 month	dind	126.254723449982
99	13	1 month	dind	370.06036338813
100	14	1 month	dind	69.9992639710933
101	16	1 month	dind	115.219496656109
102	19	1 month	dind	150.428049456219
103	20	1 month	dind	192.896531588022
104	21	1 month	dind	420.478491665748
105	22	1 month	dind	213.691253574814
106	24	1 month	dind	-9.1439562298397
107	25	1 month	dind	213.160812426779
108	26	1 month	dind	261.726744327747
109	27	1 month	dind	265.527005336343
110	28	1 month	dind	144.809802017665
111	29	1 month	dind	16.4150007829526
112	30	1 month	dind	98.1965746946978
113	31	1 month	dind	395.540354778092
114	32	1 month	dind	170.319772292834
115	33	1 month	dind	55.6722147325937
116	35	1 month	dind	76.2876998422311
117	39	1 month	dind	97.1041320686165
118	40	1 month	dind	66.2150826070476
119	41	1 month	dind	82.9128676482826
120	42	1 month	dind	173.879732344694
121	43	1 month	dind	127.736337021459
122	44	1 month	dind	234.986025561802
123	45	1 month	dind	205.794667143601
124	46	1 month	dind	26.3261299039899
125	47	1 month	dind	92.6334027732184
126	48	1 month	dind	132.738329301197
127	49	1 month	dind	19.1145251533309
128	50	1 month	dind	240.009047974954
129	51	1 month	dind	146.89824438203
130	52	1 month	dind	73.9465379056074
131	1	24 hours	dgist	2.92638158526599
132	2	24 hours	dgist	25.6532979881634
133	3	24 hours	dgist	-56.2937675936526
134	4	24 hours	dgist	9.1252968528289
135	6	24 hours	dgist	-33.9018933690181
136	7	24 hours	dgist	-15.0076880351015
137	9	24 hours	dgist	2.3213366514815
138	11	24 hours	dgist	11.4999612376459
139	15	24 hours	dgist	34.128901192375
140	16	24 hours	dgist	61.4135912338919
141	17	24 hours	dgist	76.464435171519
142	18	24 hours	dgist	-6.3253191720012
143	19	24 hours	dgist	-53.4418830003182
144	20	24 hours	dgist	-31.5678119976199
145	22	24 hours	dgist	-66.1061454738254
146	24	24 hours	dgist	-36.120707973951
147	25	24 hours	dgist	52.3026250919541
148	26	24 hours	dgist	28.414695083763
149	27	24 hours	dgist	-10.475002472888
150	29	24 hours	dgist	26.0574011246366
151	30	24 hours	dgist	34.749577391077
152	32	24 hours	dgist	-24.854296663469
153	33	24 hours	dgist	-3.5941581318679
154	34	24 hours	dgist	27.756793535615
155	35	24 hours	dgist	-28.4629238119135
156	36	24 hours	dgist	27.0919005055105
157	37	24 hours	dgist	-4.73136892029402
158	38	24 hours	dgist	3.8241979100003
159	40	24 hours	dgist	-16.3086473076682
160	41	24 hours	dgist	38.350383605758
161	42	24 hours	dgist	-16.170638958823
162	43	24 hours	dgist	4.15336139178801
163	47	24 hours	dgist	9.99906659835001
164	48	24 hours	dgist	-12.1095560725675
165	49	24 hours	dgist	15.8245794032944
166	50	24 hours	dgist	-16.703783895028
167	51	24 hours	dgist	-28.207335249456
168	52	24 hours	dgist	-19.9965716510626
169	53	24 hours	dgist	152.047689892339
170	55	24 hours	dgist	153.460017029963
171	56	24 hours	dgist	80.660017052385
172	57	24 hours	dgist	15.0636219882184
173	58	24 hours	dgist	54.4122675383158
174	59	24 hours	dgist	13.6255001921579
175	2	1 week	dgist	-26.271082509499
176	4	1 week	dgist	29.700124511345
177	5	1 week	dgist	-7.21037102617899
178	11	1 week	dgist	24.892937498351
179	14	1 week	dgist	38.141922368633
180	15	1 week	dgist	70.950609281852
181	16	1 week	dgist	13.3464229301845
182	17	1 week	dgist	-42.3118838056177
183	18	1 week	dgist	-39.2838040284314
184	19	1 week	dgist	7.71728359355401
185	20	1 week	dgist	-32.0395381040903
186	21	1 week	dgist	38.776273266643
187	22	1 week	dgist	155.121271056628
188	23	1 week	dgist	-71.3756359342898
189	24	1 week	dgist	-9.75239372903499
190	25	1 week	dgist	7.27404372923499
191	27	1 week	dgist	14.8121231967546
192	28	1 week	dgist	23.2267722840529
193	29	1 week	dgist	33.121931964117
194	33	1 week	dgist	-111.28936136614
195	34	1 week	dgist	2.81642059368309
196	36	1 week	dgist	-42.813664970309
197	37	1 week	dgist	-17.2104962555932
198	38	1 week	dgist	6.6226363467122
199	39	1 week	dgist	-35.3054172404425
200	40	1 week	dgist	-15.074092535152
201	41	1 week	dgist	26.535889622832
202	42	1 week	dgist	96.5972793611448
203	46	1 week	dgist	-7.3683596827406
204	47	1 week	dgist	11.7918198543415
205	48	1 week	dgist	187.131287805484
206	50	1 week	dgist	40.9159319750317
207	51	1 week	dgist	60.858938066013
208	52	1 week	dgist	-10.718970863332
209	54	1 week	dgist	-23.398904845796
210	55	1 week	dgist	8.53682219510199
211	57	1 week	dgist	33.8838512342647
212	59	1 week	dgist	-8.95346513380601
213	60	1 week	dgist	-88.8147683984516
214	61	1 week	dgist	-80.6239340190179
215	63	1 week	dgist	91.466800392762
216	64	1 week	dgist	126.790018867182
217	65	1 week	dgist	62.0971917914551
218	1	1 month	dgist	139.654162710257
219	3	1 month	dgist	17.016179553216
220	4	1 month	dgist	122.723112201937
221	5	1 month	dgist	39.3644058813121
222	6	1 month	dgist	12.0947845008394
223	7	1 month	dgist	70.7479858905786
224	8	1 month	dgist	-34.523018588834
225	9	1 month	dgist	20.1639717154612
226	10	1 month	dgist	-3.501881268989
227	11	1 month	dgist	-13.6598009270292
228	12	1 month	dgist	3.31438155925701
229	13	1 month	dgist	60.1372713434719
230	14	1 month	dgist	31.9410344787784
231	16	1 month	dgist	-15.1643910488736
232	19	1 month	dgist	10.945263048044
233	20	1 month	dgist	21.1790663678605
234	21	1 month	dgist	-10.421877771061
235	22	1 month	dgist	149.63207118516
236	24	1 month	dgist	42.7035430744058
237	25	1 month	dgist	19.6519251269376
238	26	1 month	dgist	61.8767728139481
239	27	1 month	dgist	1.62662920075741
240	28	1 month	dgist	42.9581427488198
241	29	1 month	dgist	-26.913030690271
242	30	1 month	dgist	2.92061773047499
243	31	1 month	dgist	19.4112866905324
244	32	1 month	dgist	1.554855477125
245	33	1 month	dgist	-18.6220354489255
246	35	1 month	dgist	15.5928751914365
247	39	1 month	dgist	3.282052131017
248	40	1 month	dgist	55.1933821520766
249	41	1 month	dgist	38.1161656281647
250	42	1 month	dgist	25.869733000114
251	43	1 month	dgist	25.7386181114908
252	44	1 month	dgist	33.182036267521
253	45	1 month	dgist	46.942070124889
254	46	1 month	dgist	-30.7259546241781
255	47	1 month	dgist	4.2685193579569
256	48	1 month	dgist	207.316341065854
257	49	1 month	dgist	29.5770286090272
258	50	1 month	dgist	-8.4900356365765
259	51	1 month	dgist	135.842107365605
260	52	1 month	dgist	52.929211472196
