# Supplementary material for: Tracking the relation between gist and item memory over the course of long-term memory consolidation
Source: eLife journal article supplement (doi:10.7554/elife.65588), 2021-07-14
Supplement: supp [file elife-65588-supp-v2.zip › elife_poa_e65588_Figure_3_source_data_1.csv]

	ID	group	biasType	bias	day
1	1	24 hours	disbias	-0.580315966307586	Session 1
2	2	24 hours	disbias	0.492542129835524	Session 1
3	3	24 hours	disbias	0.114296963208174	Session 1
4	4	24 hours	disbias	-0.538290159906375	Session 1
5	6	24 hours	disbias	0.363030927572824	Session 1
6	7	24 hours	disbias	-0.205274000873963	Session 1
7	9	24 hours	disbias	0.251828511844001	Session 1
8	11	24 hours	disbias	0.125888182800964	Session 1
9	15	24 hours	disbias	-0.240713868313749	Session 1
10	16	24 hours	disbias	0.236452649192701	Session 1
11	17	24 hours	disbias	-0.139907368234983	Session 1
12	18	24 hours	disbias	-0.195475964462135	Session 1
13	19	24 hours	disbias	-0.0582088539553294	Session 1
14	20	24 hours	disbias	0.151267868886857	Session 1
15	22	24 hours	disbias	-0.040724559467724	Session 1
16	24	24 hours	disbias	-0.144228823350568	Session 1
17	25	24 hours	disbias	0.0969582279040883	Session 1
18	26	24 hours	disbias	-0.320261230959744	Session 1
19	27	24 hours	disbias	0.226939114382828	Session 1
20	29	24 hours	disbias	-0.358215807226278	Session 1
21	30	24 hours	disbias	0.160454371703427	Session 1
22	32	24 hours	disbias	0.479160381911181	Session 1
23	33	24 hours	disbias	0.443197785466311	Session 1
24	34	24 hours	disbias	-0.239790205708821	Session 1
25	35	24 hours	disbias	-0.286368888933167	Session 1
26	36	24 hours	disbias	0.287589985921904	Session 1
27	37	24 hours	disbias	-0.0590255558988912	Session 1
28	38	24 hours	disbias	0.168163967645365	Session 1
29	40	24 hours	disbias	-0.0319557533426137	Session 1
30	41	24 hours	disbias	0.105499497038277	Session 1
31	42	24 hours	disbias	-0.2235916297297	Session 1
32	43	24 hours	disbias	-0.613968845376876	Session 1
33	47	24 hours	disbias	-0.0500509114610979	Session 1
34	48	24 hours	disbias	0.0751137859500511	Session 1
35	49	24 hours	disbias	0.149149324542347	Session 1
36	50	24 hours	disbias	0.225370147167122	Session 1
37	51	24 hours	disbias	0.130916066051578	Session 1
38	52	24 hours	disbias	0.381360283298717	Session 1
39	53	24 hours	disbias	-0.356983750036709	Session 1
40	55	24 hours	disbias	-0.0690606204902889	Session 1
41	56	24 hours	disbias	0.251416303282946	Session 1
42	57	24 hours	disbias	-0.293572525049806	Session 1
43	58	24 hours	disbias	-0.168378218104737	Session 1
44	59	24 hours	disbias	0.166076048445203	Session 1
45	2	1 week	disbias	-0.0863017914897735	Session 1
46	4	1 week	disbias	0.259856766256882	Session 1
47	5	1 week	disbias	-0.190532549446375	Session 1
48	11	1 week	disbias	0.145832353387944	Session 1
49	14	1 week	disbias	0.0417485861107637	Session 1
50	15	1 week	disbias	0.242833146361634	Session 1
51	16	1 week	disbias	-0.197445214227345	Session 1
52	17	1 week	disbias	-0.274418654705914	Session 1
53	18	1 week	disbias	-0.00445487812732866	Session 1
54	19	1 week	disbias	-0.269122258521342	Session 1
55	20	1 week	disbias	0.100775514221765	Session 1
56	21	1 week	disbias	-0.3278839970002	Session 1
57	22	1 week	disbias	0.800710335279324	Session 1
58	23	1 week	disbias	-0.234826176402367	Session 1
59	24	1 week	disbias	0.646136943862829	Session 1
60	25	1 week	disbias	-0.183429911326608	Session 1
61	27	1 week	disbias	0.0364680855862279	Session 1
62	28	1 week	disbias	-0.0141438022055933	Session 1
63	29	1 week	disbias	0.438497314707751	Session 1
64	33	1 week	disbias	0.158407854165431	Session 1
65	34	1 week	disbias	0.0522674373066531	Session 1
66	36	1 week	disbias	0.128910384579895	Session 1
67	37	1 week	disbias	-0.0396958345430587	Session 1
68	38	1 week	disbias	0.13414868016567	Session 1
69	39	1 week	disbias	-0.216819066225531	Session 1
70	40	1 week	disbias	0.133385059077645	Session 1
71	41	1 week	disbias	0.255743529411689	Session 1
72	42	1 week	disbias	-0.223089867197645	Session 1
73	46	1 week	disbias	-0.173396902145775	Session 1
74	47	1 week	disbias	-0.210933273606393	Session 1
75	48	1 week	disbias	0.146578185419417	Session 1
76	50	1 week	disbias	-0.337269903389056	Session 1
77	51	1 week	disbias	0.162583116263216	Session 1
78	52	1 week	disbias	-0.5888025943768	Session 1
79	54	1 week	disbias	0.478151178037898	Session 1
80	55	1 week	disbias	0.222700490829468	Session 1
81	57	1 week	disbias	-0.514097827784841	Session 1
82	59	1 week	disbias	0.169054213773535	Session 1
83	60	1 week	disbias	-0.0381931829580607	Session 1
84	61	1 week	disbias	0.220867325605819	Session 1
85	63	1 week	disbias	0.191712672454011	Session 1
86	64	1 week	disbias	0.27639061912684	Session 1
87	65	1 week	disbias	-0.522110264036853	Session 1
88	1	1 month	disbias	0.256705326737311	Session 1
89	3	1 month	disbias	0.220441643234754	Session 1
90	4	1 month	disbias	0.0752597277211019	Session 1
91	5	1 month	disbias	-0.183702255796871	Session 1
92	6	1 month	disbias	0.341907623886593	Session 1
93	7	1 month	disbias	0.0926626094685024	Session 1
94	8	1 month	disbias	0.132803274977375	Session 1
95	9	1 month	disbias	-0.742924472968841	Session 1
96	10	1 month	disbias	-0.272650291009708	Session 1
97	11	1 month	disbias	0.180402651830958	Session 1
98	12	1 month	disbias	0.203068521671703	Session 1
99	13	1 month	disbias	-0.398683546116472	Session 1
100	14	1 month	disbias	-0.152488675566197	Session 1
101	16	1 month	disbias	-0.411408205660171	Session 1
102	19	1 month	disbias	-0.323746705342458	Session 1
103	20	1 month	disbias	-0.292648622523689	Session 1
104	21	1 month	disbias	-0.0583571945729897	Session 1
105	22	1 month	disbias	0.503277233557326	Session 1
106	24	1 month	disbias	0.249648073733275	Session 1
107	25	1 month	disbias	-0.203750969586078	Session 1
108	26	1 month	disbias	-0.230418732873306	Session 1
109	27	1 month	disbias	-0.560852029403808	Session 1
110	28	1 month	disbias	-0.243158584854425	Session 1
111	29	1 month	disbias	0.471583890581426	Session 1
112	30	1 month	disbias	0.46920366229315	Session 1
113	31	1 month	disbias	-0.230389400291999	Session 1
114	32	1 month	disbias	-0.472838242844357	Session 1
115	33	1 month	disbias	0.202019871974688	Session 1
116	35	1 month	disbias	-0.341919646887727	Session 1
117	39	1 month	disbias	0.20840160073865	Session 1
118	40	1 month	disbias	-0.422485150185922	Session 1
119	41	1 month	disbias	0.167285115532918	Session 1
120	42	1 month	disbias	-0.244298693787327	Session 1
121	43	1 month	disbias	-0.838068209821655	Session 1
122	44	1 month	disbias	-0.224907272704288	Session 1
123	45	1 month	disbias	0.222448807971326	Session 1
124	46	1 month	disbias	-0.188997007245498	Session 1
125	47	1 month	disbias	0.0961886551583336	Session 1
126	48	1 month	disbias	-0.165689664462166	Session 1
127	49	1 month	disbias	-0.441114576590618	Session 1
128	50	1 month	disbias	0.0355430967364185	Session 1
129	51	1 month	disbias	0.0411325379787509	Session 1
130	52	1 month	disbias	-0.466189746705483	Session 1
131	1	24 hours	sim_disbias	-0.0111545078654637	Session 1
132	2	24 hours	sim_disbias	-0.0532008708900147	Session 1
133	3	24 hours	sim_disbias	-0.0235049431676691	Session 1
134	4	24 hours	sim_disbias	-0.0708679384641856	Session 1
135	6	24 hours	sim_disbias	-0.0269098839250532	Session 1
136	7	24 hours	sim_disbias	-0.0389314792602671	Session 1
137	9	24 hours	sim_disbias	-0.0662325241198261	Session 1
138	11	24 hours	sim_disbias	-0.0113349412155083	Session 1
139	15	24 hours	sim_disbias	-0.0681230827986138	Session 1
140	16	24 hours	sim_disbias	-0.033598979564056	Session 1
141	17	24 hours	sim_disbias	-0.0265175248355821	Session 1
142	18	24 hours	sim_disbias	-0.0436570047372171	Session 1
143	19	24 hours	sim_disbias	-0.0452178971811574	Session 1
144	20	24 hours	sim_disbias	-0.0448499596496692	Session 1
145	22	24 hours	sim_disbias	-0.0190881415126549	Session 1
146	24	24 hours	sim_disbias	-0.0560227142169861	Session 1
147	25	24 hours	sim_disbias	-0.0454999821889745	Session 1
148	26	24 hours	sim_disbias	-0.059739536751525	Session 1
149	27	24 hours	sim_disbias	-0.0379541965091608	Session 1
150	29	24 hours	sim_disbias	-0.0435417765447762	Session 1
151	30	24 hours	sim_disbias	-0.0365325830805081	Session 1
152	32	24 hours	sim_disbias	-0.0369464607305409	Session 1
153	33	24 hours	sim_disbias	-0.0269075779791283	Session 1
154	34	24 hours	sim_disbias	-0.0206636582118785	Session 1
155	35	24 hours	sim_disbias	-0.022614074862307	Session 1
156	36	24 hours	sim_disbias	-0.0351316092393503	Session 1
157	37	24 hours	sim_disbias	-0.0382909615514595	Session 1
158	38	24 hours	sim_disbias	-0.0324783600425923	Session 1
159	40	24 hours	sim_disbias	-0.0378336211909703	Session 1
160	41	24 hours	sim_disbias	-0.0531866170411206	Session 1
161	42	24 hours	sim_disbias	-0.0467471260307518	Session 1
162	43	24 hours	sim_disbias	-0.0675769177552366	Session 1
163	47	24 hours	sim_disbias	-0.0760980048151508	Session 1
164	48	24 hours	sim_disbias	-0.058767310288055	Session 1
165	49	24 hours	sim_disbias	-0.0433783578474559	Session 1
166	50	24 hours	sim_disbias	-0.0359752897286724	Session 1
167	51	24 hours	sim_disbias	-0.0587590011752898	Session 1
168	52	24 hours	sim_disbias	-0.0314751259744285	Session 1
169	53	24 hours	sim_disbias	-0.0603031658312027	Session 1
170	55	24 hours	sim_disbias	-0.0883106153477279	Session 1
171	56	24 hours	sim_disbias	-0.0311136201797908	Session 1
172	57	24 hours	sim_disbias	-0.0388336872954387	Session 1
173	58	24 hours	sim_disbias	-0.0421422609884154	Session 1
174	59	24 hours	sim_disbias	-0.0329747857742703	Session 1
175	2	1 week	sim_disbias	-0.0132784032517386	Session 1
176	4	1 week	sim_disbias	-0.0133096952477128	Session 1
177	5	1 week	sim_disbias	-0.0298329893202272	Session 1
178	11	1 week	sim_disbias	-0.0334158285062771	Session 1
179	14	1 week	sim_disbias	-0.0466983234787584	Session 1
180	15	1 week	sim_disbias	-0.0714641446464976	Session 1
181	16	1 week	sim_disbias	-0.0501050586415553	Session 1
182	17	1 week	sim_disbias	-0.0281650713694561	Session 1
183	18	1 week	sim_disbias	-0.0129481534050332	Session 1
184	19	1 week	sim_disbias	-0.0559402663537152	Session 1
185	20	1 week	sim_disbias	-0.0467277494072469	Session 1
186	21	1 week	sim_disbias	-0.0287923054111393	Session 1
187	22	1 week	sim_disbias	-0.0225183743689007	Session 1
188	23	1 week	sim_disbias	-0.0540288731426139	Session 1
189	24	1 week	sim_disbias	-0.0461962012001312	Session 1
190	25	1 week	sim_disbias	-0.0571204500882538	Session 1
191	27	1 week	sim_disbias	-0.0123468710910463	Session 1
192	28	1 week	sim_disbias	-0.0346894031236498	Session 1
193	29	1 week	sim_disbias	-0.0423796307417411	Session 1
194	33	1 week	sim_disbias	-0.0927953149758288	Session 1
195	34	1 week	sim_disbias	-0.0509665082587253	Session 1
196	36	1 week	sim_disbias	-0.0452678591403132	Session 1
197	37	1 week	sim_disbias	-0.0481212943312492	Session 1
198	38	1 week	sim_disbias	-0.0386608387155534	Session 1
199	39	1 week	sim_disbias	-0.0557506195340436	Session 1
200	40	1 week	sim_disbias	-0.0473493047880322	Session 1
201	41	1 week	sim_disbias	-0.0493622553530851	Session 1
202	42	1 week	sim_disbias	-0.0182006779592765	Session 1
203	46	1 week	sim_disbias	-0.0550303503618284	Session 1
204	47	1 week	sim_disbias	-0.0550962215438435	Session 1
205	48	1 week	sim_disbias	-0.0323861684331965	Session 1
206	50	1 week	sim_disbias	-0.0221960352277633	Session 1
207	51	1 week	sim_disbias	-0.00973902818985267	Session 1
208	52	1 week	sim_disbias	-0.0441273086663552	Session 1
209	54	1 week	sim_disbias	-0.0391400780265077	Session 1
210	55	1 week	sim_disbias	-0.0246089871190494	Session 1
211	57	1 week	sim_disbias	-0.0222590347021932	Session 1
212	59	1 week	sim_disbias	-0.0483052570872572	Session 1
213	60	1 week	sim_disbias	-0.0360803898524696	Session 1
214	61	1 week	sim_disbias	-0.0361755420851793	Session 1
215	63	1 week	sim_disbias	-0.0528461273276063	Session 1
216	64	1 week	sim_disbias	-0.0287268182711125	Session 1
217	65	1 week	sim_disbias	-0.0552296371758368	Session 1
218	1	1 month	sim_disbias	-0.00298267243841529	Session 1
219	3	1 month	sim_disbias	-0.0307933044909882	Session 1
220	4	1 month	sim_disbias	-0.0708203114034284	Session 1
221	5	1 month	sim_disbias	-0.0568535902174527	Session 1
222	6	1 month	sim_disbias	-0.0277384862403865	Session 1
223	7	1 month	sim_disbias	-0.041656685715021	Session 1
224	8	1 month	sim_disbias	-0.0643718809486284	Session 1
225	9	1 month	sim_disbias	-0.0194563973995434	Session 1
226	10	1 month	sim_disbias	-0.0470605825116119	Session 1
227	11	1 month	sim_disbias	-0.0232379078738537	Session 1
228	12	1 month	sim_disbias	-0.0416390374010249	Session 1
229	13	1 month	sim_disbias	-0.0432597071723732	Session 1
230	14	1 month	sim_disbias	-0.0188690354685651	Session 1
231	16	1 month	sim_disbias	-0.0425865523865314	Session 1
232	19	1 month	sim_disbias	-0.0544384984284953	Session 1
233	20	1 month	sim_disbias	-0.0420231795788653	Session 1
234	21	1 month	sim_disbias	-0.0609308810369963	Session 1
235	22	1 month	sim_disbias	-0.0380176504971015	Session 1
236	24	1 month	sim_disbias	-0.0448011539199586	Session 1
237	25	1 month	sim_disbias	-0.0384863354378637	Session 1
238	26	1 month	sim_disbias	-0.0488031147032305	Session 1
239	27	1 month	sim_disbias	-0.0392273312958448	Session 1
240	28	1 month	sim_disbias	-0.0291312667502512	Session 1
241	29	1 month	sim_disbias	-0.0309459769083833	Session 1
242	30	1 month	sim_disbias	-0.0277644770851562	Session 1
243	31	1 month	sim_disbias	-0.0416174300028919	Session 1
244	32	1 month	sim_disbias	-0.0353383213574193	Session 1
245	33	1 month	sim_disbias	-0.0302904350480732	Session 1
246	35	1 month	sim_disbias	-0.0427556693457736	Session 1
247	39	1 month	sim_disbias	-0.0472803540609333	Session 1
248	40	1 month	sim_disbias	-0.053129449179268	Session 1
249	41	1 month	sim_disbias	-0.0266689033788819	Session 1
250	42	1 month	sim_disbias	-0.047696929499988	Session 1
251	43	1 month	sim_disbias	-0.0350544145301053	Session 1
252	44	1 month	sim_disbias	-0.0602898243199295	Session 1
253	45	1 month	sim_disbias	-0.0395750340706757	Session 1
254	46	1 month	sim_disbias	-0.0426650749229377	Session 1
255	47	1 month	sim_disbias	-0.0416922684945258	Session 1
256	48	1 month	sim_disbias	-0.0345451290225954	Session 1
257	49	1 month	sim_disbias	-0.0781015137443102	Session 1
258	50	1 month	sim_disbias	-0.0278060928872729	Session 1
259	51	1 month	sim_disbias	-0.0411596539225479	Session 1
260	52	1 month	sim_disbias	-0.0194221708630954	Session 1
261	1	24 hours	sim_disbias_gist	0.482638525557632	Session 1
262	2	24 hours	sim_disbias_gist	0.473140319895672	Session 1
263	3	24 hours	sim_disbias_gist	0.504786385732176	Session 1
264	4	24 hours	sim_disbias_gist	0.444446525525461	Session 1
265	6	24 hours	sim_disbias_gist	0.488682603715441	Session 1
266	7	24 hours	sim_disbias_gist	0.489409904369751	Session 1
267	9	24 hours	sim_disbias_gist	0.45126871033942	Session 1
268	11	24 hours	sim_disbias_gist	0.47343097934371	Session 1
269	15	24 hours	sim_disbias_gist	0.471681760795717	Session 1
270	16	24 hours	sim_disbias_gist	0.475046648422851	Session 1
271	17	24 hours	sim_disbias_gist	0.47865458994289	Session 1
272	18	24 hours	sim_disbias_gist	0.486937798623299	Session 1
273	19	24 hours	sim_disbias_gist	0.471715499697547	Session 1
274	20	24 hours	sim_disbias_gist	0.467573190411345	Session 1
275	22	24 hours	sim_disbias_gist	0.482791682558624	Session 1
276	24	24 hours	sim_disbias_gist	0.472069498791553	Session 1
277	25	24 hours	sim_disbias_gist	0.457857916009485	Session 1
278	26	24 hours	sim_disbias_gist	0.462480066206157	Session 1
279	27	24 hours	sim_disbias_gist	0.490611251192417	Session 1
280	29	24 hours	sim_disbias_gist	0.473856173788318	Session 1
281	30	24 hours	sim_disbias_gist	0.481755906442459	Session 1
282	32	24 hours	sim_disbias_gist	0.476482402603206	Session 1
283	33	24 hours	sim_disbias_gist	0.485460769993367	Session 1
284	34	24 hours	sim_disbias_gist	0.490663610467193	Session 1
285	35	24 hours	sim_disbias_gist	0.483980313245313	Session 1
286	36	24 hours	sim_disbias_gist	0.471246495153506	Session 1
287	37	24 hours	sim_disbias_gist	0.463402575313305	Session 1
288	38	24 hours	sim_disbias_gist	0.490423427123477	Session 1
289	40	24 hours	sim_disbias_gist	0.477725693952828	Session 1
290	41	24 hours	sim_disbias_gist	0.457607001284848	Session 1
291	42	24 hours	sim_disbias_gist	0.461762651832984	Session 1
292	43	24 hours	sim_disbias_gist	0.452600593386248	Session 1
293	47	24 hours	sim_disbias_gist	0.463087828438768	Session 1
294	48	24 hours	sim_disbias_gist	0.465746347805316	Session 1
295	49	24 hours	sim_disbias_gist	0.482515286389117	Session 1
296	50	24 hours	sim_disbias_gist	0.464017303286626	Session 1
297	51	24 hours	sim_disbias_gist	0.477200469090819	Session 1
298	52	24 hours	sim_disbias_gist	0.473181952104483	Session 1
299	53	24 hours	sim_disbias_gist	0.474488258630175	Session 1
300	55	24 hours	sim_disbias_gist	0.461482522606658	Session 1
301	56	24 hours	sim_disbias_gist	0.472804123023359	Session 1
302	57	24 hours	sim_disbias_gist	0.496935884642442	Session 1
303	58	24 hours	sim_disbias_gist	0.482618015910785	Session 1
304	59	24 hours	sim_disbias_gist	0.49839850931393	Session 1
305	2	1 week	sim_disbias_gist	0.484312540017184	Session 1
306	4	1 week	sim_disbias_gist	0.483066043283655	Session 1
307	5	1 week	sim_disbias_gist	0.486778692560392	Session 1
308	11	1 week	sim_disbias_gist	0.482441829741838	Session 1
309	14	1 week	sim_disbias_gist	0.472789656535504	Session 1
310	15	1 week	sim_disbias_gist	0.464061078500518	Session 1
311	16	1 week	sim_disbias_gist	0.469066956298901	Session 1
312	17	1 week	sim_disbias_gist	0.48400557049959	Session 1
313	18	1 week	sim_disbias_gist	0.486413888922099	Session 1
314	19	1 week	sim_disbias_gist	0.454822504087818	Session 1
315	20	1 week	sim_disbias_gist	0.472334502076381	Session 1
316	21	1 week	sim_disbias_gist	0.492936644789283	Session 1
317	22	1 week	sim_disbias_gist	0.492203528530239	Session 1
318	23	1 week	sim_disbias_gist	0.466809997724944	Session 1
319	24	1 week	sim_disbias_gist	0.494086879199769	Session 1
320	25	1 week	sim_disbias_gist	0.477520149503905	Session 1
321	27	1 week	sim_disbias_gist	0.47917058548926	Session 1
322	28	1 week	sim_disbias_gist	0.480841960000445	Session 1
323	29	1 week	sim_disbias_gist	0.474181944999789	Session 1
324	33	1 week	sim_disbias_gist	0.471986717631892	Session 1
325	34	1 week	sim_disbias_gist	0.460651755098687	Session 1
326	36	1 week	sim_disbias_gist	0.463856508995665	Session 1
327	37	1 week	sim_disbias_gist	0.476587214316909	Session 1
328	38	1 week	sim_disbias_gist	0.475679636528798	Session 1
329	39	1 week	sim_disbias_gist	0.464355497497455	Session 1
330	40	1 week	sim_disbias_gist	0.471149780601109	Session 1
331	41	1 week	sim_disbias_gist	0.476913730010606	Session 1
332	42	1 week	sim_disbias_gist	0.479459475999093	Session 1
333	46	1 week	sim_disbias_gist	0.461520935898651	Session 1
334	47	1 week	sim_disbias_gist	0.474871121904604	Session 1
335	48	1 week	sim_disbias_gist	0.482246663043929	Session 1
336	50	1 week	sim_disbias_gist	0.490313989594616	Session 1
337	51	1 week	sim_disbias_gist	0.500316056980107	Session 1
338	52	1 week	sim_disbias_gist	0.464527104113404	Session 1
339	54	1 week	sim_disbias_gist	0.467251296412554	Session 1
340	55	1 week	sim_disbias_gist	0.479821995113898	Session 1
341	57	1 week	sim_disbias_gist	0.477222895313228	Session 1
342	59	1 week	sim_disbias_gist	0.466412791663233	Session 1
343	60	1 week	sim_disbias_gist	0.468757001213784	Session 1
344	61	1 week	sim_disbias_gist	0.481182689503784	Session 1
345	63	1 week	sim_disbias_gist	0.4758110240567	Session 1
346	64	1 week	sim_disbias_gist	0.469031414993855	Session 1
347	65	1 week	sim_disbias_gist	0.469454613653293	Session 1
348	1	1 month	sim_disbias_gist	0.49449788985888	Session 1
349	3	1 month	sim_disbias_gist	0.467818394348511	Session 1
350	4	1 month	sim_disbias_gist	0.482953911704923	Session 1
351	5	1 month	sim_disbias_gist	0.471326851464383	Session 1
352	6	1 month	sim_disbias_gist	0.483131041068636	Session 1
353	7	1 month	sim_disbias_gist	0.477764432120791	Session 1
354	8	1 month	sim_disbias_gist	0.458258851634586	Session 1
355	9	1 month	sim_disbias_gist	0.495289390137643	Session 1
356	10	1 month	sim_disbias_gist	0.483209699164008	Session 1
357	11	1 month	sim_disbias_gist	0.474900125326623	Session 1
358	12	1 month	sim_disbias_gist	0.475196535746593	Session 1
359	13	1 month	sim_disbias_gist	0.479448861154053	Session 1
360	14	1 month	sim_disbias_gist	0.486108824380887	Session 1
361	16	1 month	sim_disbias_gist	0.48215922129253	Session 1
362	19	1 month	sim_disbias_gist	0.464445664098886	Session 1
363	20	1 month	sim_disbias_gist	0.442378098399187	Session 1
364	21	1 month	sim_disbias_gist	0.469308486227559	Session 1
365	22	1 month	sim_disbias_gist	0.470269146535289	Session 1
366	24	1 month	sim_disbias_gist	0.480424758322286	Session 1
367	25	1 month	sim_disbias_gist	0.488156022649474	Session 1
368	26	1 month	sim_disbias_gist	0.479280540151297	Session 1
369	27	1 month	sim_disbias_gist	0.472380842217167	Session 1
370	28	1 month	sim_disbias_gist	0.492123313224698	Session 1
371	29	1 month	sim_disbias_gist	0.475528813622968	Session 1
372	30	1 month	sim_disbias_gist	0.482086352327162	Session 1
373	31	1 month	sim_disbias_gist	0.475598431866953	Session 1
374	32	1 month	sim_disbias_gist	0.468571492301483	Session 1
375	33	1 month	sim_disbias_gist	0.486572472521723	Session 1
376	35	1 month	sim_disbias_gist	0.48087824400417	Session 1
377	39	1 month	sim_disbias_gist	0.47820145688082	Session 1
378	40	1 month	sim_disbias_gist	0.477547518766788	Session 1
379	41	1 month	sim_disbias_gist	0.486902148588624	Session 1
380	42	1 month	sim_disbias_gist	0.477643740306163	Session 1
381	43	1 month	sim_disbias_gist	0.487989137711447	Session 1
382	44	1 month	sim_disbias_gist	0.467568865590134	Session 1
383	45	1 month	sim_disbias_gist	0.489709363999777	Session 1
384	46	1 month	sim_disbias_gist	0.487255305194345	Session 1
385	47	1 month	sim_disbias_gist	0.479466074943854	Session 1
386	48	1 month	sim_disbias_gist	0.476838134893201	Session 1
387	49	1 month	sim_disbias_gist	0.462208022300025	Session 1
388	50	1 month	sim_disbias_gist	0.473336309811686	Session 1
389	51	1 month	sim_disbias_gist	0.472167665588109	Session 1
390	52	1 month	sim_disbias_gist	0.490102627764814	Session 1
391	1	24 hours	disbias	-0.57078575426014	Session 2
392	2	24 hours	disbias	0.323853430211822	Session 2
393	3	24 hours	disbias	0.199918241993765	Session 2
394	4	24 hours	disbias	-0.326179146827722	Session 2
395	6	24 hours	disbias	-0.0871069238654862	Session 2
396	7	24 hours	disbias	-0.277307511976546	Session 2
397	9	24 hours	disbias	-0.0224899876770654	Session 2
398	11	24 hours	disbias	-0.295722336282783	Session 2
399	15	24 hours	disbias	0.328381342985399	Session 2
400	16	24 hours	disbias	0.680743518910848	Session 2
401	17	24 hours	disbias	-0.0869756634322742	Session 2
402	18	24 hours	disbias	-0.21594555476262	Session 2
403	19	24 hours	disbias	-0.123401157429283	Session 2
404	20	24 hours	disbias	0.0988860676040003	Session 2
405	22	24 hours	disbias	0.106835412612429	Session 2
406	24	24 hours	disbias	-0.528584754788524	Session 2
407	25	24 hours	disbias	-0.00352448727158972	Session 2
408	26	24 hours	disbias	-0.189359539440286	Session 2
409	27	24 hours	disbias	-0.0177515949191789	Session 2
410	29	24 hours	disbias	-0.0776317946851393	Session 2
411	30	24 hours	disbias	0.489825724321785	Session 2
412	32	24 hours	disbias	0.343001152837317	Session 2
413	33	24 hours	disbias	0.582261514190788	Session 2
414	34	24 hours	disbias	-0.0638968833186021	Session 2
415	35	24 hours	disbias	-0.178997276455328	Session 2
416	36	24 hours	disbias	0.325930974804821	Session 2
417	37	24 hours	disbias	-0.604808727983527	Session 2
418	38	24 hours	disbias	-0.603908475835585	Session 2
419	40	24 hours	disbias	0.0984115395846478	Session 2
420	41	24 hours	disbias	0.046924575605269	Session 2
421	42	24 hours	disbias	0.188477866716641	Session 2
422	43	24 hours	disbias	-0.528849584389908	Session 2
423	47	24 hours	disbias	-0.0725065409920028	Session 2
424	48	24 hours	disbias	-0.0357236512210278	Session 2
425	49	24 hours	disbias	0.0379725437126682	Session 2
426	50	24 hours	disbias	0.00182299832880787	Session 2
427	51	24 hours	disbias	0.229366960192218	Session 2
428	52	24 hours	disbias	0.291756075158766	Session 2
429	53	24 hours	disbias	-0.12805914403155	Session 2
430	55	24 hours	disbias	0.36958431193135	Session 2
431	56	24 hours	disbias	0.335107805004793	Session 2
432	57	24 hours	disbias	-0.472229009849454	Session 2
433	58	24 hours	disbias	-0.0349500758323799	Session 2
434	59	24 hours	disbias	0.36686381949733	Session 2
435	2	1 week	disbias	0.164764252065294	Session 2
436	4	1 week	disbias	-0.0136223537015613	Session 2
437	5	1 week	disbias	-0.325026645176097	Session 2
438	11	1 week	disbias	0.145163602204143	Session 2
439	14	1 week	disbias	-0.393855233354167	Session 2
440	15	1 week	disbias	0.323862988644519	Session 2
441	16	1 week	disbias	0.0760891817634172	Session 2
442	17	1 week	disbias	-0.321723080526666	Session 2
443	18	1 week	disbias	-0.183576870446336	Session 2
444	19	1 week	disbias	0.0442012061793779	Session 2
445	20	1 week	disbias	-0.359127268446645	Session 2
446	21	1 week	disbias	0.247901820164611	Session 2
447	22	1 week	disbias	0.387699446135341	Session 2
448	23	1 week	disbias	-0.106696521636802	Session 2
449	24	1 week	disbias	-0.00194591634736042	Session 2
450	25	1 week	disbias	-0.367525963485325	Session 2
451	27	1 week	disbias	0.287157617938346	Session 2
452	28	1 week	disbias	-0.0203969423318653	Session 2
453	29	1 week	disbias	0.456123718225751	Session 2
454	33	1 week	disbias	-0.0101164525660798	Session 2
455	34	1 week	disbias	-0.424263245242939	Session 2
456	36	1 week	disbias	-0.0964568065566312	Session 2
457	37	1 week	disbias	-0.150330142610568	Session 2
458	38	1 week	disbias	0.06542557605835	Session 2
459	39	1 week	disbias	-0.124699201350323	Session 2
460	40	1 week	disbias	0.25836369387623	Session 2
461	41	1 week	disbias	-0.0205337752778286	Session 2
462	42	1 week	disbias	-0.415570146587677	Session 2
463	46	1 week	disbias	-0.192428999291323	Session 2
464	47	1 week	disbias	0.0385598484607105	Session 2
465	48	1 week	disbias	0.116586530296018	Session 2
466	50	1 week	disbias	0.185920681853633	Session 2
467	51	1 week	disbias	-0.200630150788984	Session 2
468	52	1 week	disbias	-0.320748749863634	Session 2
469	54	1 week	disbias	-0.0680699868119536	Session 2
470	55	1 week	disbias	-0.146373020043552	Session 2
471	57	1 week	disbias	-0.0523186540933276	Session 2
472	59	1 week	disbias	-0.158829722471346	Session 2
473	60	1 week	disbias	0.13674423565372	Session 2
474	61	1 week	disbias	0.236486496269841	Session 2
475	63	1 week	disbias	0.421888974970488	Session 2
476	64	1 week	disbias	-0.0695084819573852	Session 2
477	65	1 week	disbias	-0.481362351372509	Session 2
478	1	1 month	disbias	0.0357242866936649	Session 2
479	3	1 month	disbias	-0.244194903274643	Session 2
480	4	1 month	disbias	-0.172510245849829	Session 2
481	5	1 month	disbias	-0.371712013477073	Session 2
482	6	1 month	disbias	0.141750148612596	Session 2
483	7	1 month	disbias	-0.547328256751451	Session 2
484	8	1 month	disbias	-0.194390939706901	Session 2
485	9	1 month	disbias	0.277389616490611	Session 2
486	10	1 month	disbias	-0.174688447267714	Session 2
487	11	1 month	disbias	-0.345502536847735	Session 2
488	12	1 month	disbias	0.0546297138838428	Session 2
489	13	1 month	disbias	0.000572706228020634	Session 2
490	14	1 month	disbias	-0.464641476596741	Session 2
491	16	1 month	disbias	0.400295190939705	Session 2
492	19	1 month	disbias	-0.201508383396339	Session 2
493	20	1 month	disbias	0.00864018674452268	Session 2
494	21	1 month	disbias	0.089101542201296	Session 2
495	22	1 month	disbias	0.229398923737279	Session 2
496	24	1 month	disbias	0.355332896571646	Session 2
497	25	1 month	disbias	-0.449079346416968	Session 2
498	26	1 month	disbias	0.05124890340372	Session 2
499	27	1 month	disbias	-0.176258517906164	Session 2
500	28	1 month	disbias	-0.0455908346309432	Session 2
501	29	1 month	disbias	-0.142970047739721	Session 2
502	30	1 month	disbias	0.0731152292979387	Session 2
503	31	1 month	disbias	0.0771867136688621	Session 2
504	32	1 month	disbias	0.281559875494181	Session 2
505	33	1 month	disbias	0.0575633206939449	Session 2
506	35	1 month	disbias	-0.253923163829443	Session 2
507	39	1 month	disbias	0.2459451792269	Session 2
508	40	1 month	disbias	-0.134884923219432	Session 2
509	41	1 month	disbias	0.275638115839351	Session 2
510	42	1 month	disbias	0.453513780967683	Session 2
511	43	1 month	disbias	0.297900894457442	Session 2
512	44	1 month	disbias	0.137541339934261	Session 2
513	45	1 month	disbias	0.147263973070449	Session 2
514	46	1 month	disbias	-0.0381437729927284	Session 2
515	47	1 month	disbias	0.547849839931968	Session 2
516	48	1 month	disbias	0.0688733757778619	Session 2
517	49	1 month	disbias	0.309074685572177	Session 2
518	50	1 month	disbias	0.121157206196315	Session 2
519	51	1 month	disbias	-0.00392888294537556	Session 2
520	52	1 month	disbias	0.0158817064612417	Session 2
521	1	24 hours	sim_disbias	-0.0490029767410549	Session 2
522	2	24 hours	sim_disbias	-0.0306918881401355	Session 2
523	3	24 hours	sim_disbias	-0.0250217292731372	Session 2
524	4	24 hours	sim_disbias	-0.0670383233885341	Session 2
525	6	24 hours	sim_disbias	-0.0628731616313776	Session 2
526	7	24 hours	sim_disbias	-0.0534360089167049	Session 2
527	9	24 hours	sim_disbias	-0.0437351964296798	Session 2
528	11	24 hours	sim_disbias	-0.145033072636705	Session 2
529	15	24 hours	sim_disbias	-0.0762916262522708	Session 2
530	16	24 hours	sim_disbias	-0.0364128624961485	Session 2
531	17	24 hours	sim_disbias	-0.045413586112103	Session 2
532	18	24 hours	sim_disbias	-0.0465413314728725	Session 2
533	19	24 hours	sim_disbias	-0.0804390134805639	Session 2
534	20	24 hours	sim_disbias	-0.0262710430034448	Session 2
535	22	24 hours	sim_disbias	-0.0283438637244387	Session 2
536	24	24 hours	sim_disbias	-0.0482973386925528	Session 2
537	25	24 hours	sim_disbias	-0.0199493138115719	Session 2
538	26	24 hours	sim_disbias	-0.0587958576885403	Session 2
539	27	24 hours	sim_disbias	-0.0481783505350156	Session 2
540	29	24 hours	sim_disbias	-0.0941335596599306	Session 2
541	30	24 hours	sim_disbias	-0.0658468947301829	Session 2
542	32	24 hours	sim_disbias	-0.0749180160312756	Session 2
543	33	24 hours	sim_disbias	-0.124246898209443	Session 2
544	34	24 hours	sim_disbias	-0.0939966571714715	Session 2
545	35	24 hours	sim_disbias	-0.0347206355468237	Session 2
546	36	24 hours	sim_disbias	-0.0469782673048078	Session 2
547	37	24 hours	sim_disbias	-0.0946276588387917	Session 2
548	38	24 hours	sim_disbias	-0.0559280904258965	Session 2
549	40	24 hours	sim_disbias	-0.0256055475714611	Session 2
550	41	24 hours	sim_disbias	-0.0680442672548269	Session 2
551	42	24 hours	sim_disbias	-0.0402301783333258	Session 2
552	43	24 hours	sim_disbias	-0.0683014901334456	Session 2
553	47	24 hours	sim_disbias	-0.0691818107430504	Session 2
554	48	24 hours	sim_disbias	-0.0693198035646448	Session 2
555	49	24 hours	sim_disbias	-0.0841553047421358	Session 2
556	50	24 hours	sim_disbias	-0.0563847333841115	Session 2
557	51	24 hours	sim_disbias	-0.0336372465945233	Session 2
558	52	24 hours	sim_disbias	-0.0831796549939177	Session 2
559	53	24 hours	sim_disbias	-0.0914950972311393	Session 2
560	55	24 hours	sim_disbias	-0.183446494989209	Session 2
561	56	24 hours	sim_disbias	-0.0637565990803024	Session 2
562	57	24 hours	sim_disbias	-0.0336561144934214	Session 2
563	58	24 hours	sim_disbias	-0.0242767129885534	Session 2
564	59	24 hours	sim_disbias	-0.0326500081197984	Session 2
565	2	1 week	sim_disbias	-0.0282214359165178	Session 2
566	4	1 week	sim_disbias	-0.0569092754010238	Session 2
567	5	1 week	sim_disbias	-0.0829505648472962	Session 2
568	11	1 week	sim_disbias	-0.10511702039101	Session 2
569	14	1 week	sim_disbias	-0.0670049036177614	Session 2
570	15	1 week	sim_disbias	-0.0577632361405671	Session 2
571	16	1 week	sim_disbias	-0.0630335942545091	Session 2
572	17	1 week	sim_disbias	-0.0404170467469528	Session 2
573	18	1 week	sim_disbias	-0.15077767442919	Session 2
574	19	1 week	sim_disbias	-0.119687327616783	Session 2
575	20	1 week	sim_disbias	-0.0933626304068522	Session 2
576	21	1 week	sim_disbias	-0.0442769500892032	Session 2
577	22	1 week	sim_disbias	-0.0114624781382693	Session 2
578	23	1 week	sim_disbias	-0.084333739656573	Session 2
579	24	1 week	sim_disbias	-0.175085971989947	Session 2
580	25	1 week	sim_disbias	-0.106293482354877	Session 2
581	27	1 week	sim_disbias	-0.0318206732659034	Session 2
582	28	1 week	sim_disbias	-0.0321687736279927	Session 2
583	29	1 week	sim_disbias	-0.0717796291816652	Session 2
584	33	1 week	sim_disbias	-0.0481541499124142	Session 2
585	34	1 week	sim_disbias	-0.0675082525725729	Session 2
586	36	1 week	sim_disbias	-0.0843770951442909	Session 2
587	37	1 week	sim_disbias	-0.186499007503936	Session 2
588	38	1 week	sim_disbias	-0.116776378905943	Session 2
589	39	1 week	sim_disbias	-0.0755255871138516	Session 2
590	40	1 week	sim_disbias	-0.0785932364624819	Session 2
591	41	1 week	sim_disbias	-0.120429893670071	Session 2
592	42	1 week	sim_disbias	-0.0675232000198188	Session 2
593	46	1 week	sim_disbias	-0.0678061060066185	Session 2
594	47	1 week	sim_disbias	-0.0520637685022301	Session 2
595	48	1 week	sim_disbias	-0.0679964914522199	Session 2
596	50	1 week	sim_disbias	-0.0613860008653672	Session 2
597	51	1 week	sim_disbias	-0.113224803171717	Session 2
598	52	1 week	sim_disbias	-0.0724853015592253	Session 2
599	54	1 week	sim_disbias	-0.115758441777976	Session 2
600	55	1 week	sim_disbias	-0.0585518670883551	Session 2
601	57	1 week	sim_disbias	-0.0665872848916807	Session 2
602	59	1 week	sim_disbias	-0.145791985398752	Session 2
603	60	1 week	sim_disbias	-0.0570978407053252	Session 2
604	61	1 week	sim_disbias	-0.0465486642604933	Session 2
605	63	1 week	sim_disbias	-0.0387313967138944	Session 2
606	64	1 week	sim_disbias	-0.0457711460470249	Session 2
607	65	1 week	sim_disbias	-0.100688860991868	Session 2
608	1	1 month	sim_disbias	-0.035804033953864	Session 2
609	3	1 month	sim_disbias	-0.123899043332619	Session 2
610	4	1 month	sim_disbias	-0.160092805910969	Session 2
611	5	1 month	sim_disbias	-0.169296360182347	Session 2
612	6	1 month	sim_disbias	-0.141914531615515	Session 2
613	7	1 month	sim_disbias	-0.132248913633693	Session 2
614	8	1 month	sim_disbias	-0.239503471809577	Session 2
615	9	1 month	sim_disbias	-0.110380646046351	Session 2
616	10	1 month	sim_disbias	-0.112719195797085	Session 2
617	11	1 month	sim_disbias	-0.0857295444696845	Session 2
618	12	1 month	sim_disbias	-0.134719693460758	Session 2
619	13	1 month	sim_disbias	-0.190321295159912	Session 2
620	14	1 month	sim_disbias	-0.00378916673617779	Session 2
621	16	1 month	sim_disbias	-0.129855352113688	Session 2
622	19	1 month	sim_disbias	-0.141578163212617	Session 2
623	20	1 month	sim_disbias	-0.187435498755182	Session 2
624	21	1 month	sim_disbias	-0.243635882393257	Session 2
625	22	1 month	sim_disbias	0.00270608700188745	Session 2
626	24	1 month	sim_disbias	-0.0224472892322711	Session 2
627	25	1 month	sim_disbias	-0.12795294552606	Session 2
628	26	1 month	sim_disbias	-0.195499524071916	Session 2
629	27	1 month	sim_disbias	-0.212456675580541	Session 2
630	28	1 month	sim_disbias	-0.133863597823942	Session 2
631	29	1 month	sim_disbias	-0.0649777949063732	Session 2
632	30	1 month	sim_disbias	-0.0594983971446918	Session 2
633	31	1 month	sim_disbias	-0.306844213712418	Session 2
634	32	1 month	sim_disbias	-0.186736657368132	Session 2
635	33	1 month	sim_disbias	-0.125911880791046	Session 2
636	35	1 month	sim_disbias	-0.0773570674819607	Session 2
637	39	1 month	sim_disbias	-0.0926368658017463	Session 2
638	40	1 month	sim_disbias	-0.105669657908569	Session 2
639	41	1 month	sim_disbias	-0.081166388396243	Session 2
640	42	1 month	sim_disbias	-0.105276961670533	Session 2
641	43	1 month	sim_disbias	-0.160916041411372	Session 2
642	44	1 month	sim_disbias	-0.175013144912867	Session 2
643	45	1 month	sim_disbias	-0.171828884074769	Session 2
644	46	1 month	sim_disbias	-0.0525075366531619	Session 2
645	47	1 month	sim_disbias	-0.134951533451069	Session 2
646	48	1 month	sim_disbias	-0.25649217904456	Session 2
647	49	1 month	sim_disbias	-0.0859612114771978	Session 2
648	50	1 month	sim_disbias	-0.23259160674068	Session 2
649	51	1 month	sim_disbias	-0.160863194346415	Session 2
650	52	1 month	sim_disbias	-0.0600512435485531	Session 2
651	1	24 hours	sim_disbias_gist	0.475424472889765	Session 2
652	2	24 hours	sim_disbias_gist	0.442283239846462	Session 2
653	3	24 hours	sim_disbias_gist	0.488867944492082	Session 2
654	4	24 hours	sim_disbias_gist	0.443457761366663	Session 2
655	6	24 hours	sim_disbias_gist	0.467380406193514	Session 2
656	7	24 hours	sim_disbias_gist	0.469756722512325	Session 2
657	9	24 hours	sim_disbias_gist	0.466148120118517	Session 2
658	11	24 hours	sim_disbias_gist	0.32395383010386	Session 2
659	15	24 hours	sim_disbias_gist	0.45359038674045	Session 2
660	16	24 hours	sim_disbias_gist	0.471900550337792	Session 2
661	17	24 hours	sim_disbias_gist	0.45548293691957	Session 2
662	18	24 hours	sim_disbias_gist	0.476409913173369	Session 2
663	19	24 hours	sim_disbias_gist	0.459834353642806	Session 2
664	20	24 hours	sim_disbias_gist	0.482405532128	Session 2
665	22	24 hours	sim_disbias_gist	0.50358911231827	Session 2
666	24	24 hours	sim_disbias_gist	0.468122868727984	Session 2
667	25	24 hours	sim_disbias_gist	0.47211839155546	Session 2
668	26	24 hours	sim_disbias_gist	0.461286790520467	Session 2
669	27	24 hours	sim_disbias_gist	0.459274884383372	Session 2
670	29	24 hours	sim_disbias_gist	0.452906438560777	Session 2
671	30	24 hours	sim_disbias_gist	0.461777568033178	Session 2
672	32	24 hours	sim_disbias_gist	0.452483406860911	Session 2
673	33	24 hours	sim_disbias_gist	0.296338369746042	Session 2
674	34	24 hours	sim_disbias_gist	0.274736042552747	Session 2
675	35	24 hours	sim_disbias_gist	0.484955424071724	Session 2
676	36	24 hours	sim_disbias_gist	0.47634180579057	Session 2
677	37	24 hours	sim_disbias_gist	0.4245164033735	Session 2
678	38	24 hours	sim_disbias_gist	0.463515529281508	Session 2
679	40	24 hours	sim_disbias_gist	0.47868562583527	Session 2
680	41	24 hours	sim_disbias_gist	0.430386055125577	Session 2
681	42	24 hours	sim_disbias_gist	0.482076691385119	Session 2
682	43	24 hours	sim_disbias_gist	0.464689857973225	Session 2
683	47	24 hours	sim_disbias_gist	0.436061786480522	Session 2
684	48	24 hours	sim_disbias_gist	0.449697765795325	Session 2
685	49	24 hours	sim_disbias_gist	0.445883801046168	Session 2
686	50	24 hours	sim_disbias_gist	0.463760682892154	Session 2
687	51	24 hours	sim_disbias_gist	0.479399000439941	Session 2
688	52	24 hours	sim_disbias_gist	0.464493845930145	Session 2
689	53	24 hours	sim_disbias_gist	0.425045435055546	Session 2
690	55	24 hours	sim_disbias_gist	0.29356595369857	Session 2
691	56	24 hours	sim_disbias_gist	0.4617447167924	Session 2
692	57	24 hours	sim_disbias_gist	0.488301887802389	Session 2
693	58	24 hours	sim_disbias_gist	0.485905137806527	Session 2
694	59	24 hours	sim_disbias_gist	0.464997504693192	Session 2
695	2	1 week	sim_disbias_gist	0.478901962771753	Session 2
696	4	1 week	sim_disbias_gist	0.47143269779844	Session 2
697	5	1 week	sim_disbias_gist	0.397756612600531	Session 2
698	11	1 week	sim_disbias_gist	0.389882038945213	Session 2
699	14	1 week	sim_disbias_gist	0.465707986763397	Session 2
700	15	1 week	sim_disbias_gist	0.445684403801774	Session 2
701	16	1 week	sim_disbias_gist	0.462818007564764	Session 2
702	17	1 week	sim_disbias_gist	0.469075908552226	Session 2
703	18	1 week	sim_disbias_gist	0.267181901798714	Session 2
704	19	1 week	sim_disbias_gist	0.317603387785583	Session 2
705	20	1 week	sim_disbias_gist	0.435069898209297	Session 2
706	21	1 week	sim_disbias_gist	0.485951157567615	Session 2
707	22	1 week	sim_disbias_gist	0.434828664034828	Session 2
708	23	1 week	sim_disbias_gist	0.438134171308921	Session 2
709	24	1 week	sim_disbias_gist	0.299918891050661	Session 2
710	25	1 week	sim_disbias_gist	0.341906076354477	Session 2
711	27	1 week	sim_disbias_gist	0.496882960459293	Session 2
712	28	1 week	sim_disbias_gist	0.471475739864767	Session 2
713	29	1 week	sim_disbias_gist	0.477723409335806	Session 2
714	33	1 week	sim_disbias_gist	0.477377973306074	Session 2
715	34	1 week	sim_disbias_gist	0.45127595844744	Session 2
716	36	1 week	sim_disbias_gist	0.2922128499076	Session 2
717	37	1 week	sim_disbias_gist	0.213350100884874	Session 2
718	38	1 week	sim_disbias_gist	0.378780685387616	Session 2
719	39	1 week	sim_disbias_gist	0.467963497664897	Session 2
720	40	1 week	sim_disbias_gist	0.461554572631712	Session 2
721	41	1 week	sim_disbias_gist	0.417098972777379	Session 2
722	42	1 week	sim_disbias_gist	0.460933665258453	Session 2
723	46	1 week	sim_disbias_gist	0.464724455740781	Session 2
724	47	1 week	sim_disbias_gist	0.47264882442795	Session 2
725	48	1 week	sim_disbias_gist	0.451915517909208	Session 2
726	50	1 week	sim_disbias_gist	0.479210243427057	Session 2
727	51	1 week	sim_disbias_gist	0.426967164567211	Session 2
728	52	1 week	sim_disbias_gist	0.468813195956043	Session 2
729	54	1 week	sim_disbias_gist	0.376820485803898	Session 2
730	55	1 week	sim_disbias_gist	0.473140397163402	Session 2
731	57	1 week	sim_disbias_gist	0.477303473589245	Session 2
732	59	1 week	sim_disbias_gist	0.249280541911171	Session 2
733	60	1 week	sim_disbias_gist	0.460285897653743	Session 2
734	61	1 week	sim_disbias_gist	0.478627407671844	Session 2
735	63	1 week	sim_disbias_gist	0.431911038020192	Session 2
736	64	1 week	sim_disbias_gist	0.471271920979266	Session 2
737	65	1 week	sim_disbias_gist	0.451693015973261	Session 2
738	1	1 month	sim_disbias_gist	0.423124079297266	Session 2
739	3	1 month	sim_disbias_gist	0.338751398829043	Session 2
740	4	1 month	sim_disbias_gist	0.217966082356956	Session 2
741	5	1 month	sim_disbias_gist	0.310670941402214	Session 2
742	6	1 month	sim_disbias_gist	0.127711309537587	Session 2
743	7	1 month	sim_disbias_gist	0.233333196266185	Session 2
744	8	1 month	sim_disbias_gist	0.15803399569508	Session 2
745	9	1 month	sim_disbias_gist	0.395916239644189	Session 2
746	10	1 month	sim_disbias_gist	0.208588834579313	Session 2
747	11	1 month	sim_disbias_gist	0.427612163167307	Session 2
748	12	1 month	sim_disbias_gist	0.315205014323709	Session 2
749	13	1 month	sim_disbias_gist	0.0356987125193583	Session 2
750	14	1 month	sim_disbias_gist	0.459000620841722	Session 2
751	16	1 month	sim_disbias_gist	0.339888296968154	Session 2
752	19	1 month	sim_disbias_gist	0.328854342762898	Session 2
753	20	1 month	sim_disbias_gist	0.184049020945566	Session 2
754	21	1 month	sim_disbias_gist	-0.0489310493851476	Session 2
755	22	1 month	sim_disbias_gist	0.35804106174039	Session 2
756	24	1 month	sim_disbias_gist	0.477835124947488	Session 2
757	25	1 month	sim_disbias_gist	0.302684544017019	Session 2
758	26	1 month	sim_disbias_gist	0.168438440544691	Session 2
759	27	1 month	sim_disbias_gist	0.222680715647442	Session 2
760	28	1 month	sim_disbias_gist	0.270006646775625	Session 2
761	29	1 month	sim_disbias_gist	0.459503899496033	Session 2
762	30	1 month	sim_disbias_gist	0.437465038221736	Session 2
763	31	1 month	sim_disbias_gist	-0.0260214280777535	Session 2
764	32	1 month	sim_disbias_gist	0.248750631283574	Session 2
765	33	1 month	sim_disbias_gist	0.398317939993032	Session 2
766	35	1 month	sim_disbias_gist	0.43603810587383	Session 2
767	39	1 month	sim_disbias_gist	0.396370770915812	Session 2
768	40	1 month	sim_disbias_gist	0.449307614293262	Session 2
769	41	1 month	sim_disbias_gist	0.447186584609361	Session 2
770	42	1 month	sim_disbias_gist	0.34482659365827	Session 2
771	43	1 month	sim_disbias_gist	0.33218676439936	Session 2
772	44	1 month	sim_disbias_gist	0.20167254163288	Session 2
773	45	1 month	sim_disbias_gist	0.205308089863953	Session 2
774	46	1 month	sim_disbias_gist	0.452476073263795	Session 2
775	47	1 month	sim_disbias_gist	0.368557987941714	Session 2
776	48	1 month	sim_disbias_gist	0.21335240883163	Session 2
777	49	1 month	sim_disbias_gist	0.446942783273884	Session 2
778	50	1 month	sim_disbias_gist	0.157622112454713	Session 2
779	51	1 month	sim_disbias_gist	0.208310283432346	Session 2
780	52	1 month	sim_disbias_gist	0.464815855380367	Session 2
