# Supplementary material for: Tracking the relation between gist and item memory over the course of long-term memory consolidation
Source: eLife journal article supplement (doi:10.7554/elife.65588), 2021-07-14
Supplement: supp [file elife-65588-supp-v2.zip › elife_poa_e65588_Figure_4_source_data_1.csv]

	ID	day	memoryType	errorChange
1	1	2	dind	8.4762198825945
2	2	2	dind	3.7295796739398
3	3	2	dind	26.4131248395437
4	7	2	dind	13.9491279590945
5	8	2	dind	5.2771707582235
6	9	2	dind	9.4079107585779
7	17	2	dind	17.6183049763143
8	18	2	dind	88.6831352608582
9	19	2	dind	25.7495614575277
10	22	2	dind	53.5042154810599
11	23	2	dind	15.5318403932896
12	25	2	dind	44.8746399782606
13	26	2	dind	0.686003751448599
14	27	2	dind	56.3779402233725
15	28	2	dind	17.7589490425799
16	30	2	dind	-4.7545818242176
17	31	2	dind	44.2126368161687
18	33	2	dind	21.8592535660346
19	34	2	dind	37.2637317657708
20	35	2	dind	102.944091639761
21	37	2	dind	22.7794334010178
22	38	2	dind	4.166741198843
23	39	2	dind	10.6879331795209
24	40	2	dind	23.4746448012168
25	41	2	dind	14.1379993240051
26	47	2	dind	8.3270577276564
27	49	2	dind	17.4494922591158
28	52	2	dind	13.4586870545695
29	53	2	dind	108.120104995971
30	55	2	dind	2.1495548362888
31	58	2	dind	12.1537724917996
32	59	2	dind	-4.0653085277108
33	60	2	dind	10.3598812730827
34	61	2	dind	5.534744793822
35	62	2	dind	33.1591253579749
36	64	2	dind	-2.5107639997871
37	65	2	dind	12.8670722739315
38	66	2	dind	25.8692279441887
39	70	2	dind	7.3644001828715
40	71	2	dind	20.195348059185
41	72	2	dind	-2.1312212956367
42	73	2	dind	75.5921064325162
43	77	2	dind	149.011676721009
44	1	3	dind	219.581078844725
45	2	3	dind	211.405495476924
46	3	3	dind	149.449939321861
47	7	3	dind	117.477704208627
48	8	3	dind	104.499908637328
49	9	3	dind	36.2500289793668
50	17	3	dind	55.3230878527211
51	18	3	dind	78.3615085083895
52	19	3	dind	56.9902525972322
53	22	3	dind	55.0593405167146
54	23	3	dind	60.6695687944531
55	25	3	dind	78.763166361915
56	26	3	dind	58.1278787696643
57	27	3	dind	99.9459390278017
58	28	3	dind	135.730113461704
59	30	3	dind	92.5319928056283
60	31	3	dind	107.719942523834
61	33	3	dind	43.8481859310886
62	34	3	dind	213.603566344179
63	35	3	dind	236.24010416674
64	37	3	dind	188.919232045275
65	38	3	dind	75.2356699961178
66	39	3	dind	87.7579339206514
67	40	3	dind	37.0392826124857
68	41	3	dind	72.1444727122891
69	47	3	dind	36.4292445930481
70	49	3	dind	115.986501065583
71	52	3	dind	86.774341433687
72	53	3	dind	107.116131002288
73	55	3	dind	26.0238625757703
74	58	3	dind	73.5649656956702
75	59	3	dind	12.1388779290078
76	60	3	dind	45.767763935854
77	61	3	dind	67.4139597256688
78	62	3	dind	102.998785087327
79	64	3	dind	42.3771560375295
80	65	3	dind	8.1434222599928
81	66	3	dind	91.2914025549573
82	70	3	dind	42.2187354880029
83	71	3	dind	96.7648214532341
84	72	3	dind	55.7994535400865
85	73	3	dind	94.0657148075672
86	77	3	dind	79.6008585530577
87	1	2	dgist	-227.127051601645
88	2	2	dgist	5.4003768049229
89	3	2	dgist	-175.765765805599
90	7	2	dgist	43.8962102460705
91	8	2	dgist	2.8968632987417
92	9	2	dgist	-54.6941301445618
93	17	2	dgist	-39.6490327884947
94	18	2	dgist	-57.3292502480241
95	19	2	dgist	-106.438966881347
96	22	2	dgist	104.933457770788
97	23	2	dgist	17.4840554926149
98	25	2	dgist	-2.594998746656
99	26	2	dgist	-18.176836401276
100	27	2	dgist	125.464799394512
101	28	2	dgist	-23.2475926049786
102	30	2	dgist	-22.6097276241729
103	31	2	dgist	204.408776426237
104	33	2	dgist	-30.5411406290535
105	34	2	dgist	-41.587349890533
106	35	2	dgist	-32.396249375773
107	37	2	dgist	-27.560245053674
108	38	2	dgist	19.6232087783359
109	39	2	dgist	106.874056446954
110	40	2	dgist	126.869820469682
111	41	2	dgist	66.6044141445634
112	47	2	dgist	90.1812830553723
113	49	2	dgist	-29.9476735455711
114	52	2	dgist	12.258021407109
115	53	2	dgist	-52.635279378167
116	55	2	dgist	-22.4198587795238
117	58	2	dgist	-13.9150600078157
118	59	2	dgist	-43.1372899760291
119	60	2	dgist	-58.3089953046
120	61	2	dgist	67.89579860621
121	62	2	dgist	141.376856068309
122	64	2	dgist	6.48927925950599
123	65	2	dgist	-61.695909671897
124	66	2	dgist	-15.099500019827
125	70	2	dgist	6.68321700993599
126	71	2	dgist	96.7551844360367
127	72	2	dgist	-5.5465033324239
128	73	2	dgist	-34.3496284206749
129	77	2	dgist	-0.90396208735001
130	1	3	dgist	-118.732602707551
131	2	3	dgist	104.149644023447
132	3	3	dgist	-6.181861444357
133	7	3	dgist	9.55918266768661
134	8	3	dgist	55.2072750968023
135	9	3	dgist	-14.2210920822902
136	17	3	dgist	-54.5036055652771
137	18	3	dgist	10.3735105881403
138	19	3	dgist	-57.4744760467538
139	22	3	dgist	8.22298101518598
140	23	3	dgist	26.2257172278785
141	25	3	dgist	-53.6117925409774
142	26	3	dgist	-50.795782205263
143	27	3	dgist	-30.025500221099
144	28	3	dgist	-29.9245674020852
145	30	3	dgist	128.603288738154
146	31	3	dgist	115.925621351499
147	33	3	dgist	26.5337330604387
148	34	3	dgist	-49.830176863261
149	35	3	dgist	-42.497027903727
150	37	3	dgist	-105.342603947537
151	38	3	dgist	-8.5876516957061
152	39	3	dgist	-8.26088354285099
153	40	3	dgist	69.2972068218435
154	41	3	dgist	-44.2754237848711
155	47	3	dgist	135.843880539852
156	49	3	dgist	-12.9512605196811
157	52	3	dgist	-28.658058917329
158	53	3	dgist	-87.215004903011
159	55	3	dgist	-36.8687431625022
160	58	3	dgist	-8.9376225028021
161	59	3	dgist	-113.952640103026
162	60	3	dgist	1.37683689430702
163	61	3	dgist	136.258912942486
164	62	3	dgist	-35.7359141044491
165	64	3	dgist	-1.772212147262
166	65	3	dgist	-74.2267165674736
167	66	3	dgist	-24.53833231979
168	70	3	dgist	10.199992155918
169	71	3	dgist	99.9068083270477
170	72	3	dgist	4.391862373264
171	73	3	dgist	-22.5779311150799
172	77	3	dgist	-41.962907019069
