# Supplementary material for: Tracking the relation between gist and item memory over the course of long-term memory consolidation
Source: eLife journal article supplement (doi:10.7554/elife.65588), 2021-07-14
Supplement: supp [file elife-65588-supp-v2.zip › elife_poa_e65588_Figure_5_source_data_1.csv]

	ID	day	biasType	global bias
1	1	1	disbias	-0.397038476669954
2	2	1	disbias	-0.102367377673395
3	3	1	disbias	0.0328760360271444
4	7	1	disbias	-0.682158313354024
5	8	1	disbias	-0.0854484136472418
6	9	1	disbias	0.0634582924413709
7	17	1	disbias	-0.458106709367891
8	18	1	disbias	-0.172008571470201
9	19	1	disbias	-0.206413441419481
10	22	1	disbias	-0.0721286156302885
11	23	1	disbias	0.0869720102952332
12	25	1	disbias	-0.176339359769496
13	26	1	disbias	-0.218325327889665
14	27	1	disbias	0.535491886076177
15	28	1	disbias	-0.347549818526589
16	30	1	disbias	-0.101048308083377
17	31	1	disbias	-0.305636348103202
18	33	1	disbias	0.0995764292666679
19	34	1	disbias	-0.0984463081798476
20	35	1	disbias	0.474531178906467
21	37	1	disbias	0.455687033224016
22	38	1	disbias	-0.33844183319816
23	39	1	disbias	0.00618370343362529
24	40	1	disbias	-0.281908993987591
25	41	1	disbias	-0.323499000783024
26	47	1	disbias	-0.246103145798835
27	49	1	disbias	-0.190455192399069
28	52	1	disbias	-0.0879502053663089
29	53	1	disbias	0.157118235447242
30	55	1	disbias	-0.105935264514329
31	58	1	disbias	-0.384261601550115
32	59	1	disbias	-0.246703475455863
33	60	1	disbias	-0.276883035634369
34	61	1	disbias	0.124858221015608
35	62	1	disbias	-0.15593645175269
36	64	1	disbias	0.149889932617815
37	65	1	disbias	-0.23032013098888
38	66	1	disbias	-0.0675753593833949
39	70	1	disbias	-0.51136894173858
40	71	1	disbias	0.228058813088263
41	72	1	disbias	-0.297157089678017
42	73	1	disbias	-0.0461541129913507
43	77	1	disbias	-0.416277031645698
44	1	1	sim_disbias	-0.0155749892104556
45	2	1	sim_disbias	-0.0159738170301011
46	3	1	sim_disbias	-0.019795879427565
47	7	1	sim_disbias	-0.0268565107708108
48	8	1	sim_disbias	-0.0532582866280449
49	9	1	sim_disbias	-0.0357570304392118
50	17	1	sim_disbias	-0.0391960763196962
51	18	1	sim_disbias	-0.0285325808526352
52	19	1	sim_disbias	-0.0139852501088626
53	22	1	sim_disbias	-0.0175712796134651
54	23	1	sim_disbias	-0.0237959774229791
55	25	1	sim_disbias	-0.0361969710123876
56	26	1	sim_disbias	-0.0569848281229723
57	27	1	sim_disbias	-0.00835355681818874
58	28	1	sim_disbias	-0.0250854709089568
59	30	1	sim_disbias	-0.0356499848997092
60	31	1	sim_disbias	-0.120000566106876
61	33	1	sim_disbias	-0.0304926740757797
62	34	1	sim_disbias	-0.0602048335114278
63	35	1	sim_disbias	-0.0226660435453362
64	37	1	sim_disbias	-0.0388036701284961
65	38	1	sim_disbias	-0.0321346116398243
66	39	1	sim_disbias	-0.0162418788468266
67	40	1	sim_disbias	-0.081955288922929
68	41	1	sim_disbias	-0.03789395134425
69	47	1	sim_disbias	-0.0322587156837658
70	49	1	sim_disbias	-0.0447658445832245
71	52	1	sim_disbias	-0.0196078043595102
72	53	1	sim_disbias	-0.0462703045368002
73	55	1	sim_disbias	-0.0477812491293153
74	58	1	sim_disbias	-0.0524502128745136
75	59	1	sim_disbias	-0.0843167825806442
76	60	1	sim_disbias	-0.0512989173659384
77	61	1	sim_disbias	-0.0393302711881046
78	62	1	sim_disbias	-0.0365281388261853
79	64	1	sim_disbias	-0.0684822282891208
80	65	1	sim_disbias	-0.0272154759918431
81	66	1	sim_disbias	-0.0625674299967481
82	70	1	sim_disbias	-0.0481759863752552
83	71	1	sim_disbias	-0.102924315187916
84	72	1	sim_disbias	-0.0218626081408021
85	73	1	sim_disbias	-0.0423267116982844
86	77	1	sim_disbias	-0.0152181902191072
87	1	1	sim_disbias_gist	0.482637264287412
88	2	1	sim_disbias_gist	0.492766407878555
89	3	1	sim_disbias_gist	0.489427935495902
90	7	1	sim_disbias_gist	0.484492097277814
91	8	1	sim_disbias_gist	0.442678579491418
92	9	1	sim_disbias_gist	0.488237131073853
93	17	1	sim_disbias_gist	0.478635485710472
94	18	1	sim_disbias_gist	0.497403886508477
95	19	1	sim_disbias_gist	0.487917686214074
96	22	1	sim_disbias_gist	0.492570451241726
97	23	1	sim_disbias_gist	0.488161466968168
98	25	1	sim_disbias_gist	0.485949163061377
99	26	1	sim_disbias_gist	0.45607224662565
100	27	1	sim_disbias_gist	0.482973034057235
101	28	1	sim_disbias_gist	0.481785702851328
102	30	1	sim_disbias_gist	0.474231681720762
103	31	1	sim_disbias_gist	0.349348254187591
104	33	1	sim_disbias_gist	0.488053166245165
105	34	1	sim_disbias_gist	0.452332015333403
106	35	1	sim_disbias_gist	0.49208345376163
107	37	1	sim_disbias_gist	0.484570280471014
108	38	1	sim_disbias_gist	0.477635009737704
109	39	1	sim_disbias_gist	0.473376062693071
110	40	1	sim_disbias_gist	0.415622956827128
111	41	1	sim_disbias_gist	0.481165342151968
112	47	1	sim_disbias_gist	0.487417357909912
113	49	1	sim_disbias_gist	0.479586773196351
114	52	1	sim_disbias_gist	0.489783570030964
115	53	1	sim_disbias_gist	0.489996800041217
116	55	1	sim_disbias_gist	0.46856936411666
117	58	1	sim_disbias_gist	0.466106114584674
118	59	1	sim_disbias_gist	0.389426921323239
119	60	1	sim_disbias_gist	0.462954315002761
120	61	1	sim_disbias_gist	0.47516658169015
121	62	1	sim_disbias_gist	0.458236878023166
122	64	1	sim_disbias_gist	0.40951966885181
123	65	1	sim_disbias_gist	0.487914705917781
124	66	1	sim_disbias_gist	0.454294603045096
125	70	1	sim_disbias_gist	0.478168647215186
126	71	1	sim_disbias_gist	0.355017836901971
127	72	1	sim_disbias_gist	0.479630279590562
128	73	1	sim_disbias_gist	0.47615756541153
129	77	1	sim_disbias_gist	0.485962235789148
130	1	2	disbias	-0.196695392878356
131	2	2	disbias	-0.0856590004697709
132	3	2	disbias	-0.0907882046890332
133	7	2	disbias	0.0584451222323354
134	8	2	disbias	-0.171409243292399
135	9	2	disbias	-0.256329001484133
136	17	2	disbias	-0.44752325633346
137	18	2	disbias	0.0180890111332426
138	19	2	disbias	-0.0731097267562163
139	22	2	disbias	-0.547061075674272
140	23	2	disbias	-0.235339790076266
141	25	2	disbias	-0.166300591287486
142	26	2	disbias	-0.463307355694451
143	27	2	disbias	0.262751520858711
144	28	2	disbias	-0.0235783262904413
145	30	2	disbias	-0.625973307121513
146	31	2	disbias	-0.464823080005201
147	33	2	disbias	-0.167444270270961
148	34	2	disbias	0.300725082278784
149	35	2	disbias	0.388804638463263
150	37	2	disbias	0.125723579167087
151	38	2	disbias	0.0737195762333363
152	39	2	disbias	-0.210484994572468
153	40	2	disbias	-0.0409436544662029
154	41	2	disbias	-0.0692265943486282
155	47	2	disbias	-0.0398159844321191
156	49	2	disbias	-0.539896333298041
157	52	2	disbias	0.00192095092049385
158	53	2	disbias	-0.0749433750365702
159	55	2	disbias	0.267840771450048
160	58	2	disbias	-0.647170000578368
161	59	2	disbias	-0.581567430807747
162	60	2	disbias	-0.326113095198346
163	61	2	disbias	-0.170705605059495
164	62	2	disbias	-0.350505917572538
165	64	2	disbias	-0.0335016558402951
166	65	2	disbias	-0.234113092655569
167	66	2	disbias	0.0629255142742623
168	70	2	disbias	-0.00848940856393136
169	71	2	disbias	-0.455736687091292
170	72	2	disbias	0.00604541211334601
171	73	2	disbias	-0.245284955628497
172	77	2	disbias	-0.509358831889919
173	1	2	sim_disbias	-0.0272217514039918
174	2	2	sim_disbias	-0.0808418302851982
175	3	2	sim_disbias	-0.135025368829292
176	7	2	sim_disbias	-0.0689792007606701
177	8	2	sim_disbias	-0.149067872349802
178	9	2	sim_disbias	-0.0539520778826636
179	17	2	sim_disbias	-0.0878772792418177
180	18	2	sim_disbias	-0.253319598140035
181	19	2	sim_disbias	-0.0594364483830593
182	22	2	sim_disbias	-0.0352674683952742
183	23	2	sim_disbias	-0.0643368977774782
184	25	2	sim_disbias	-0.110503522175516
185	26	2	sim_disbias	-0.0572925917006312
186	27	2	sim_disbias	-0.0428658111960171
187	28	2	sim_disbias	-0.0572721276383555
188	30	2	sim_disbias	-0.131375761731018
189	31	2	sim_disbias	-0.0545777575746636
190	33	2	sim_disbias	-0.0640210009312144
191	34	2	sim_disbias	-0.0549707252468288
192	35	2	sim_disbias	-0.00128772436545702
193	37	2	sim_disbias	-0.0653496930179349
194	38	2	sim_disbias	-0.0683160718589935
195	39	2	sim_disbias	-0.0144083662705071
196	40	2	sim_disbias	-0.0583379301436716
197	41	2	sim_disbias	-0.0383186797538807
198	47	2	sim_disbias	-0.0490152238363102
199	49	2	sim_disbias	-0.0695566176088201
200	52	2	sim_disbias	-0.0307191308597038
201	53	2	sim_disbias	-0.0999283889386857
202	55	2	sim_disbias	-0.0632763418013657
203	58	2	sim_disbias	-0.0531282770389756
204	59	2	sim_disbias	-0.048684516478817
205	60	2	sim_disbias	-0.0715386196559464
206	61	2	sim_disbias	-0.0578907071334655
207	62	2	sim_disbias	-0.0928911564345473
208	64	2	sim_disbias	-0.0783941971681314
209	65	2	sim_disbias	-0.0619329207894768
210	66	2	sim_disbias	-0.0950455691192123
211	70	2	sim_disbias	-0.0509025670374951
212	71	2	sim_disbias	-0.0358649300409108
213	72	2	sim_disbias	-0.0388541889482612
214	73	2	sim_disbias	-0.193072233564615
215	77	2	sim_disbias	-0.121476176053949
216	1	2	sim_disbias_gist	0.476995001111134
217	2	2	sim_disbias_gist	0.397858008923863
218	3	2	sim_disbias_gist	0.314920944012993
219	7	2	sim_disbias_gist	0.459167418494169
220	8	2	sim_disbias_gist	0.309621690500355
221	9	2	sim_disbias_gist	0.471097829715223
222	17	2	sim_disbias_gist	0.445088418243596
223	18	2	sim_disbias_gist	0.157734943798168
224	19	2	sim_disbias_gist	0.455428705013747
225	22	2	sim_disbias_gist	0.476175819367078
226	23	2	sim_disbias_gist	0.429755822665281
227	25	2	sim_disbias_gist	0.39810591453743
228	26	2	sim_disbias_gist	0.474956842524288
229	27	2	sim_disbias_gist	0.473489248171057
230	28	2	sim_disbias_gist	0.457821820496832
231	30	2	sim_disbias_gist	0.326704828045334
232	31	2	sim_disbias_gist	0.473198006750569
233	33	2	sim_disbias_gist	0.456577129523424
234	34	2	sim_disbias_gist	0.463561731115105
235	35	2	sim_disbias_gist	0.448123585370674
236	37	2	sim_disbias_gist	0.459986085626581
237	38	2	sim_disbias_gist	0.453086562609679
238	39	2	sim_disbias_gist	0.484132051556771
239	40	2	sim_disbias_gist	0.4615420818264
240	41	2	sim_disbias_gist	0.48674541519482
241	47	2	sim_disbias_gist	0.478088879472517
242	49	2	sim_disbias_gist	0.456737997710046
243	52	2	sim_disbias_gist	0.488468988424079
244	53	2	sim_disbias_gist	0.367963823237759
245	55	2	sim_disbias_gist	0.463259845646644
246	58	2	sim_disbias_gist	0.47157741937965
247	59	2	sim_disbias_gist	0.465712189871875
248	60	2	sim_disbias_gist	0.445757471881382
249	61	2	sim_disbias_gist	0.471614974337332
250	62	2	sim_disbias_gist	0.400423996748517
251	64	2	sim_disbias_gist	0.408732918656649
252	65	2	sim_disbias_gist	0.460064211420264
253	66	2	sim_disbias_gist	0.420597405236932
254	70	2	sim_disbias_gist	0.462301683519308
255	71	2	sim_disbias_gist	0.462326542984127
256	72	2	sim_disbias_gist	0.494391525577223
257	73	2	sim_disbias_gist	0.252567703174033
258	77	2	sim_disbias_gist	0.323265007748264
259	1	3	disbias	0.132012001058454
260	2	3	disbias	-0.166390093598522
261	3	3	disbias	0.184446978833975
262	7	3	disbias	0.0544089139583475
263	8	3	disbias	0.0596454095480977
264	9	3	disbias	-0.0597791263904725
265	17	3	disbias	-0.459139322465983
266	18	3	disbias	-0.245365448754752
267	19	3	disbias	-0.0853161961262153
268	22	3	disbias	-0.632837688557754
269	23	3	disbias	0.171181721357001
270	25	3	disbias	-0.0808237540742394
271	26	3	disbias	-0.3265019624812
272	27	3	disbias	0.235310697081941
273	28	3	disbias	-0.0782783250333184
274	30	3	disbias	-0.160223420147867
275	31	3	disbias	-0.130975317567431
276	33	3	disbias	-0.322390186915891
277	34	3	disbias	0.268348622207397
278	35	3	disbias	0.0652171882714968
279	37	3	disbias	-0.201273999121138
280	38	3	disbias	-0.285999124968785
281	39	3	disbias	-0.00872446863987142
282	40	3	disbias	-0.356514092744574
283	41	3	disbias	-0.693717414851075
284	47	3	disbias	-0.0516833455217162
285	49	3	disbias	-0.0630827863010144
286	52	3	disbias	-0.161014100225136
287	53	3	disbias	-0.319271442411855
288	55	3	disbias	-0.350232198511813
289	58	3	disbias	-0.639457149007311
290	59	3	disbias	-0.63986032453109
291	60	3	disbias	-0.243367394292963
292	61	3	disbias	-0.631604836218959
293	62	3	disbias	0.309436188599604
294	64	3	disbias	-0.0332381118800732
295	65	3	disbias	0.101556940601663
296	66	3	disbias	-0.100435850905413
297	70	3	disbias	-0.107226114623931
298	71	3	disbias	-0.0510180482453142
299	72	3	disbias	-0.0779194013310454
300	73	3	disbias	0.0428534700544332
301	77	3	disbias	-0.452499117340943
302	1	3	sim_disbias	-0.198961242722
303	2	3	sim_disbias	-0.208908898537622
304	3	3	sim_disbias	-0.100940531857162
305	7	3	sim_disbias	-0.179959289750008
306	8	3	sim_disbias	-0.16501294035922
307	9	3	sim_disbias	-0.102281521714443
308	17	3	sim_disbias	-0.15527842888358
309	18	3	sim_disbias	-0.12678737868854
310	19	3	sim_disbias	-0.163500141131449
311	22	3	sim_disbias	-0.0834489748070391
312	23	3	sim_disbias	-0.143491483782704
313	25	3	sim_disbias	-0.175697887882976
314	26	3	sim_disbias	-0.191654230400016
315	27	3	sim_disbias	-0.0956428482671224
316	28	3	sim_disbias	-0.156035002338654
317	30	3	sim_disbias	-0.0561299435227588
318	31	3	sim_disbias	-0.104675083932008
319	33	3	sim_disbias	-0.0753761730267257
320	34	3	sim_disbias	-0.201971198166957
321	35	3	sim_disbias	-0.0206156666393963
322	37	3	sim_disbias	-0.296152784719115
323	38	3	sim_disbias	-0.21877125555799
324	39	3	sim_disbias	-0.0722032020781013
325	40	3	sim_disbias	-0.09001069633179
326	41	3	sim_disbias	-0.17662837943441
327	47	3	sim_disbias	-0.0570494600532029
328	49	3	sim_disbias	-0.190925807952243
329	52	3	sim_disbias	-0.0964925789213195
330	53	3	sim_disbias	-0.13817668932791
331	55	3	sim_disbias	-0.0804227970942919
332	58	3	sim_disbias	-0.210568711906544
333	59	3	sim_disbias	-0.0720236005971056
334	60	3	sim_disbias	-0.185257663857052
335	61	3	sim_disbias	-0.111218238983994
336	62	3	sim_disbias	-0.059917127759969
337	64	3	sim_disbias	-0.148445275339936
338	65	3	sim_disbias	-0.0455804982268384
339	66	3	sim_disbias	-0.217233944422323
340	70	3	sim_disbias	-0.112256149796453
341	71	3	sim_disbias	-0.0345224461979776
342	72	3	sim_disbias	-0.135399531584146
343	73	3	sim_disbias	-0.175385101731947
344	77	3	sim_disbias	-0.159423276297963
345	1	3	sim_disbias_gist	0.132577397967272
346	2	3	sim_disbias_gist	0.160483649399381
347	3	3	sim_disbias_gist	0.401624870216858
348	7	3	sim_disbias_gist	0.250530163823393
349	8	3	sim_disbias_gist	0.253403724086465
350	9	3	sim_disbias_gist	0.424063662284462
351	17	3	sim_disbias_gist	0.347320947850131
352	18	3	sim_disbias_gist	0.350498960584513
353	19	3	sim_disbias_gist	0.336310875734372
354	22	3	sim_disbias_gist	0.449916127664022
355	23	3	sim_disbias_gist	0.351604151442334
356	25	3	sim_disbias_gist	0.269147869057523
357	26	3	sim_disbias_gist	0.289547231212311
358	27	3	sim_disbias_gist	0.365027477822866
359	28	3	sim_disbias_gist	0.291503194254462
360	30	3	sim_disbias_gist	0.415522839194269
361	31	3	sim_disbias_gist	0.370542605186137
362	33	3	sim_disbias_gist	0.446837525917215
363	34	3	sim_disbias_gist	0.150960611818992
364	35	3	sim_disbias_gist	0.384759619510355
365	37	3	sim_disbias_gist	0.0599222504312811
366	38	3	sim_disbias_gist	0.253215197511468
367	39	3	sim_disbias_gist	0.446991360127519
368	40	3	sim_disbias_gist	0.425244797980163
369	41	3	sim_disbias_gist	0.265517922186257
370	47	3	sim_disbias_gist	0.459032670150007
371	49	3	sim_disbias_gist	0.181108307104266
372	52	3	sim_disbias_gist	0.422762831732821
373	53	3	sim_disbias_gist	0.321927293335908
374	55	3	sim_disbias_gist	0.428102684466236
375	58	3	sim_disbias_gist	0.264661499627101
376	59	3	sim_disbias_gist	0.460156623421078
377	60	3	sim_disbias_gist	0.282264772122647
378	61	3	sim_disbias_gist	0.372675318869941
379	62	3	sim_disbias_gist	0.403713409441567
380	64	3	sim_disbias_gist	0.325575637341044
381	65	3	sim_disbias_gist	0.467858292945979
382	66	3	sim_disbias_gist	0.247396852367174
383	70	3	sim_disbias_gist	0.380549734200029
384	71	3	sim_disbias_gist	0.43761520874327
385	72	3	sim_disbias_gist	0.387758111345479
386	73	3	sim_disbias_gist	0.259586208542712
387	77	3	sim_disbias_gist	0.31872445722307
