# Supplementary material for: Tracking the relation between gist and item memory over the course of long-term memory consolidation
Source: eLife journal article supplement (doi:10.7554/elife.65588), 2021-07-14
Supplement: supp [file elife-65588-supp-v2.zip › elife_poa_e65588_Figure_5_source_data_2.csv]

	ID	day	biasType	local bias
1	1	1	local_disbias	0.104821162250756
2	2	1	local_disbias	0.0927958130138725
3	3	1	local_disbias	0.164197868107159
4	7	1	local_disbias	-0.472306843287793
5	8	1	local_disbias	0.0201291723729705
6	9	1	local_disbias	0.0531877900314838
7	17	1	local_disbias	-0.474941402424649
8	18	1	local_disbias	-0.206756051008127
9	19	1	local_disbias	-0.385744039203107
10	22	1	local_disbias	-0.438216410624041
11	23	1	local_disbias	-0.273297745441422
12	25	1	local_disbias	-0.183247034033118
13	26	1	local_disbias	-0.439725125011034
14	27	1	local_disbias	0.107034000963734
15	28	1	local_disbias	-0.318466398296162
16	30	1	local_disbias	-0.103663672495932
17	31	1	local_disbias	-0.288239536796125
18	33	1	local_disbias	-0.329517660473274
19	34	1	local_disbias	-0.114700925400401
20	35	1	local_disbias	-0.017434000144978
21	37	1	local_disbias	0.246374107163578
22	38	1	local_disbias	-0.161256690055849
23	39	1	local_disbias	0.129063099361817
24	40	1	local_disbias	0.210095499527222
25	41	1	local_disbias	-0.267936966481506
26	47	1	local_disbias	-0.37307017132423
27	49	1	local_disbias	0.041833089025124
28	52	1	local_disbias	0.233505778750743
29	53	1	local_disbias	0.385223297687031
30	55	1	local_disbias	-0.0042464343531249
31	58	1	local_disbias	-0.492990398172941
32	59	1	local_disbias	-0.315878945122183
33	60	1	local_disbias	-0.450033875727668
34	61	1	local_disbias	0.209053118826189
35	62	1	local_disbias	-0.130204260094577
36	64	1	local_disbias	0.145645810306551
37	65	1	local_disbias	0.122330399149843
38	66	1	local_disbias	-0.0276980847339801
39	70	1	local_disbias	-0.565790152841638
40	71	1	local_disbias	0.448661788824888
41	72	1	local_disbias	-0.452832064288621
42	73	1	local_disbias	-0.029049828603834
43	77	1	local_disbias	-0.0982452677933559
44	1	1	sim_local_disbias	-0.0350711390366348
45	2	1	sim_local_disbias	-0.0122448545960364
46	3	1	sim_local_disbias	-0.0202700610676407
47	7	1	sim_local_disbias	-0.0568328114590637
48	8	1	sim_local_disbias	-0.0594847757056939
49	9	1	sim_local_disbias	-0.033338338608237
50	17	1	sim_local_disbias	-0.0440346663617037
51	18	1	sim_local_disbias	-0.0230528257605766
52	19	1	sim_local_disbias	-0.0241571502895488
53	22	1	sim_local_disbias	-0.0208284257585977
54	23	1	sim_local_disbias	-0.0305378846866554
55	25	1	sim_local_disbias	-0.0385991768033863
56	26	1	sim_local_disbias	-0.0513285579714421
57	27	1	sim_local_disbias	-0.0165342004802536
58	28	1	sim_local_disbias	-0.0182211114325752
59	30	1	sim_local_disbias	-0.0483014614818745
60	31	1	sim_local_disbias	-0.0224039122823961
61	33	1	sim_local_disbias	-0.0275047029629631
62	34	1	sim_local_disbias	-0.0276496554911066
63	35	1	sim_local_disbias	-0.0279990888788895
64	37	1	sim_local_disbias	-0.026138549012559
65	38	1	sim_local_disbias	-0.0489178345353673
66	39	1	sim_local_disbias	-0.0455593776986392
67	40	1	sim_local_disbias	-0.0450463942689068
68	41	1	sim_local_disbias	-0.0282597245399746
69	47	1	sim_local_disbias	-0.0436149438466741
70	49	1	sim_local_disbias	-0.0415667413422861
71	52	1	sim_local_disbias	-0.014989037068761
72	53	1	sim_local_disbias	-0.0624308470384898
73	55	1	sim_local_disbias	-0.0453252716857251
74	58	1	sim_local_disbias	-0.06742408808813
75	59	1	sim_local_disbias	-0.04797864848814
76	60	1	sim_local_disbias	-0.0558577555768714
77	61	1	sim_local_disbias	-0.0623242450765354
78	62	1	sim_local_disbias	-0.0351533216342392
79	64	1	sim_local_disbias	-0.0415087243270008
80	65	1	sim_local_disbias	-0.0409700759046994
81	66	1	sim_local_disbias	-0.0528971230974034
82	70	1	sim_local_disbias	-0.0416274233032955
83	71	1	sim_local_disbias	-0.039487313101267
84	72	1	sim_local_disbias	-0.0374945047355129
85	73	1	sim_local_disbias	-0.0382554871531158
86	77	1	sim_local_disbias	-0.0499101908094452
87	1	1	sim_local_disbias_gist	0.478203413766055
88	2	1	sim_local_disbias_gist	0.502031702298638
89	3	1	sim_local_disbias_gist	0.486087999331014
90	7	1	sim_local_disbias_gist	0.472052550958519
91	8	1	sim_local_disbias_gist	0.471804331488634
92	9	1	sim_local_disbias_gist	0.466686020873376
93	17	1	sim_local_disbias_gist	0.483667374357718
94	18	1	sim_local_disbias_gist	0.487016347521939
95	19	1	sim_local_disbias_gist	0.483595842159469
96	22	1	sim_local_disbias_gist	0.476250770601838
97	23	1	sim_local_disbias_gist	0.47786713433777
98	25	1	sim_local_disbias_gist	0.481427683638419
99	26	1	sim_local_disbias_gist	0.477679270581561
100	27	1	sim_local_disbias_gist	0.477349658353403
101	28	1	sim_local_disbias_gist	0.476627624779837
102	30	1	sim_local_disbias_gist	0.476923102443138
103	31	1	sim_local_disbias_gist	0.49023547737768
104	33	1	sim_local_disbias_gist	0.475750304682759
105	34	1	sim_local_disbias_gist	0.478663534801316
106	35	1	sim_local_disbias_gist	0.485781399051077
107	37	1	sim_local_disbias_gist	0.475036835830445
108	38	1	sim_local_disbias_gist	0.470774852119991
109	39	1	sim_local_disbias_gist	0.485239434978524
110	40	1	sim_local_disbias_gist	0.469549230225846
111	41	1	sim_local_disbias_gist	0.472362824933579
112	47	1	sim_local_disbias_gist	0.468163123366497
113	49	1	sim_local_disbias_gist	0.483031757029379
114	52	1	sim_local_disbias_gist	0.487044204155309
115	53	1	sim_local_disbias_gist	0.46708293193439
116	55	1	sim_local_disbias_gist	0.47809471195088
117	58	1	sim_local_disbias_gist	0.463794193299981
118	59	1	sim_local_disbias_gist	0.46496909118218
119	60	1	sim_local_disbias_gist	0.479799986915029
120	61	1	sim_local_disbias_gist	0.476994865728229
121	62	1	sim_local_disbias_gist	0.48516903172784
122	64	1	sim_local_disbias_gist	0.483844254978716
123	65	1	sim_local_disbias_gist	0.484460782536223
124	66	1	sim_local_disbias_gist	0.471522977303914
125	70	1	sim_local_disbias_gist	0.480721666728425
126	71	1	sim_local_disbias_gist	0.484898734096587
127	72	1	sim_local_disbias_gist	0.465318877231547
128	73	1	sim_local_disbias_gist	0.480553293634025
129	77	1	sim_local_disbias_gist	0.463405833751949
130	1	2	local_disbias	0.189167525246389
131	2	2	local_disbias	-0.150503855434856
132	3	2	local_disbias	-0.0420236108240765
133	7	2	local_disbias	-0.274917961023562
134	8	2	local_disbias	0.229984683290418
135	9	2	local_disbias	-0.239553728679216
136	17	2	local_disbias	-0.459203396565048
137	18	2	local_disbias	-0.146480765610675
138	19	2	local_disbias	-0.1556732625393
139	22	2	local_disbias	-0.23522709657905
140	23	2	local_disbias	-0.264707141685383
141	25	2	local_disbias	-0.306075152737121
142	26	2	local_disbias	-0.457708302116379
143	27	2	local_disbias	0.253193906433841
144	28	2	local_disbias	-0.00953965515357917
145	30	2	local_disbias	-0.473428427751678
146	31	2	local_disbias	-0.115563397462009
147	33	2	local_disbias	-0.478918543014329
148	34	2	local_disbias	0.403048643248153
149	35	2	local_disbias	0.147265353131217
150	37	2	local_disbias	0.157217476323025
151	38	2	local_disbias	0.348400584587057
152	39	2	local_disbias	-0.0794910337776054
153	40	2	local_disbias	-0.202750918081727
154	41	2	local_disbias	-0.34393423683538
155	47	2	local_disbias	-0.0509706468956525
156	49	2	local_disbias	-0.42897343535222
157	52	2	local_disbias	0.0221442969647635
158	53	2	local_disbias	0.189455302285376
159	55	2	local_disbias	-0.027936799950489
160	58	2	local_disbias	-0.473719243852303
161	59	2	local_disbias	-0.337925916959264
162	60	2	local_disbias	-0.359884685005848
163	61	2	local_disbias	0.227617258872309
164	62	2	local_disbias	0.239865779947239
165	64	2	local_disbias	-0.00858425461582416
166	65	2	local_disbias	0.0345587067477856
167	66	2	local_disbias	0.0674481246413675
168	70	2	local_disbias	-0.0545462315207444
169	71	2	local_disbias	0.0390081729691656
170	72	2	local_disbias	-0.106209044839362
171	73	2	local_disbias	-0.174460096738618
172	77	2	local_disbias	-0.359159348048996
173	1	2	sim_local_disbias	-0.0537584756980621
174	2	2	sim_local_disbias	-0.0290175590861877
175	3	2	sim_local_disbias	-0.0814503891377618
176	7	2	sim_local_disbias	-0.0662061910531847
177	8	2	sim_local_disbias	-0.0631192619773307
178	9	2	sim_local_disbias	-0.0546025520281597
179	17	2	sim_local_disbias	-0.0712359325502046
180	18	2	sim_local_disbias	-0.167199161171306
181	19	2	sim_local_disbias	-0.107459850576856
182	22	2	sim_local_disbias	-0.127407985955116
183	23	2	sim_local_disbias	-0.0673817178434755
184	25	2	sim_local_disbias	-0.112700419901895
185	26	2	sim_local_disbias	-0.0355538146641984
186	27	2	sim_local_disbias	-0.138897143022351
187	28	2	sim_local_disbias	-0.0833371450019623
188	30	2	sim_local_disbias	-0.0507488015332127
189	31	2	sim_local_disbias	-0.0914075403061027
190	33	2	sim_local_disbias	-0.0588971152217733
191	34	2	sim_local_disbias	-0.0664473106845155
192	35	2	sim_local_disbias	-0.199842637403163
193	37	2	sim_local_disbias	-0.0865030265799294
194	38	2	sim_local_disbias	-0.0517417303769094
195	39	2	sim_local_disbias	-0.060024058652805
196	40	2	sim_local_disbias	-0.0894431230311258
197	41	2	sim_local_disbias	-0.0824831695892771
198	47	2	sim_local_disbias	-0.0753157170605609
199	49	2	sim_local_disbias	-0.0727433430385556
200	52	2	sim_local_disbias	-0.046986711858838
201	53	2	sim_local_disbias	-0.23088701073444
202	55	2	sim_local_disbias	-0.0299603176245898
203	58	2	sim_local_disbias	-0.0703824374510784
204	59	2	sim_local_disbias	-0.0400220329319819
205	60	2	sim_local_disbias	-0.0951819300789144
206	61	2	sim_local_disbias	-0.0617827697182461
207	62	2	sim_local_disbias	-0.0950806253173826
208	64	2	sim_local_disbias	-0.0361808495783385
209	65	2	sim_local_disbias	-0.0695175117062794
210	66	2	sim_local_disbias	-0.0962949295144356
211	70	2	sim_local_disbias	-0.0430692925467142
212	71	2	sim_local_disbias	-0.0686295374516346
213	72	2	sim_local_disbias	-0.0478232119485266
214	73	2	sim_local_disbias	-0.184976228821109
215	77	2	sim_local_disbias	-0.265170944392912
216	1	2	sim_local_disbias_gist	0.469783769360481
217	2	2	sim_local_disbias_gist	0.479743082965809
218	3	2	sim_local_disbias_gist	0.448909291057867
219	7	2	sim_local_disbias_gist	0.463951879145216
220	8	2	sim_local_disbias_gist	0.466408441180893
221	9	2	sim_local_disbias_gist	0.474843033529577
222	17	2	sim_local_disbias_gist	0.454758800947571
223	18	2	sim_local_disbias_gist	0.34112860862908
224	19	2	sim_local_disbias_gist	0.357723905152505
225	22	2	sim_local_disbias_gist	0.378741969706621
226	23	2	sim_local_disbias_gist	0.442877574088397
227	25	2	sim_local_disbias_gist	0.416038793423497
228	26	2	sim_local_disbias_gist	0.474936588657128
229	27	2	sim_local_disbias_gist	0.359427816206318
230	28	2	sim_local_disbias_gist	0.405768061993904
231	30	2	sim_local_disbias_gist	0.467456581725724
232	31	2	sim_local_disbias_gist	0.438664949450603
233	33	2	sim_local_disbias_gist	0.443787038308656
234	34	2	sim_local_disbias_gist	0.455122237837325
235	35	2	sim_local_disbias_gist	0.206331171894246
236	37	2	sim_local_disbias_gist	0.45083978381781
237	38	2	sim_local_disbias_gist	0.461902914664621
238	39	2	sim_local_disbias_gist	0.478225307248171
239	40	2	sim_local_disbias_gist	0.452900574529887
240	41	2	sim_local_disbias_gist	0.414545779766332
241	47	2	sim_local_disbias_gist	0.448933418630605
242	49	2	sim_local_disbias_gist	0.451538342330568
243	52	2	sim_local_disbias_gist	0.468958047217248
244	53	2	sim_local_disbias_gist	0.203380209440375
245	55	2	sim_local_disbias_gist	0.49199624296876
246	58	2	sim_local_disbias_gist	0.462038361941706
247	59	2	sim_local_disbias_gist	0.477989833743527
248	60	2	sim_local_disbias_gist	0.436360306829156
249	61	2	sim_local_disbias_gist	0.476669464557224
250	62	2	sim_local_disbias_gist	0.434832936607286
251	64	2	sim_local_disbias_gist	0.481329347569065
252	65	2	sim_local_disbias_gist	0.452960266079896
253	66	2	sim_local_disbias_gist	0.427859376212236
254	70	2	sim_local_disbias_gist	0.471229824803348
255	71	2	sim_local_disbias_gist	0.425993567581611
256	72	2	sim_local_disbias_gist	0.479128986328159
257	73	2	sim_local_disbias_gist	0.29403650469065
258	77	2	sim_local_disbias_gist	0.133662873795389
259	1	3	local_disbias	-0.0266317294069752
260	2	3	local_disbias	0.0983225305339674
261	3	3	local_disbias	0.0257993251001471
262	7	3	local_disbias	0.1160344200021
263	8	3	local_disbias	0.267394381028528
264	9	3	local_disbias	0.0414392828651413
265	17	3	local_disbias	-0.431044736607432
266	18	3	local_disbias	0.145157467317013
267	19	3	local_disbias	-0.0528609724935782
268	22	3	local_disbias	-0.10735211410378
269	23	3	local_disbias	0.177809280784788
270	25	3	local_disbias	0.192561769795524
271	26	3	local_disbias	-0.308757020486487
272	27	3	local_disbias	0.578893892856841
273	28	3	local_disbias	-0.249238021921192
274	30	3	local_disbias	-0.384067837444451
275	31	3	local_disbias	0.150811712252972
276	33	3	local_disbias	-0.226341415923126
277	34	3	local_disbias	0.0984206295486592
278	35	3	local_disbias	0.195013449283089
279	37	3	local_disbias	-0.173168165225225
280	38	3	local_disbias	-0.074993357927652
281	39	3	local_disbias	-0.379359044178586
282	40	3	local_disbias	-0.226572575750687
283	41	3	local_disbias	-0.450372809943335
284	47	3	local_disbias	-0.343585189147963
285	49	3	local_disbias	-0.0274267568952047
286	52	3	local_disbias	-0.0995160873008661
287	53	3	local_disbias	0.0685932710431338
288	55	3	local_disbias	-0.462653489030564
289	58	3	local_disbias	-0.385085234452322
290	59	3	local_disbias	-0.474662620027158
291	60	3	local_disbias	-0.317763901722778
292	61	3	local_disbias	0.0120613436839491
293	62	3	local_disbias	0.274063190820601
294	64	3	local_disbias	-0.0312774106355021
295	65	3	local_disbias	0.0160419475146007
296	66	3	local_disbias	-0.101023517376459
297	70	3	local_disbias	-0.248983044423733
298	71	3	local_disbias	0.261147322565406
299	72	3	local_disbias	-0.0958726084319498
300	73	3	local_disbias	-0.0265614754137326
301	77	3	local_disbias	-0.462359045895988
302	1	3	sim_local_disbias	-0.175119282515348
303	2	3	sim_local_disbias	-0.336205362722736
304	3	3	sim_local_disbias	-0.262160269934444
305	7	3	sim_local_disbias	-0.16018939578451
306	8	3	sim_local_disbias	-0.155213067674454
307	9	3	sim_local_disbias	-0.0903559550759669
308	17	3	sim_local_disbias	-0.137838770852717
309	18	3	sim_local_disbias	-0.157394075113128
310	19	3	sim_local_disbias	-0.154714500150977
311	22	3	sim_local_disbias	-0.149235781828131
312	23	3	sim_local_disbias	-0.153091404981362
313	25	3	sim_local_disbias	-0.182752435208013
314	26	3	sim_local_disbias	-0.176305057798688
315	27	3	sim_local_disbias	-0.157262421684923
316	28	3	sim_local_disbias	-0.186021873450745
317	30	3	sim_local_disbias	-0.189146803402721
318	31	3	sim_local_disbias	-0.22521972103775
319	33	3	sim_local_disbias	-0.0943492103695219
320	34	3	sim_local_disbias	-0.235188322509563
321	35	3	sim_local_disbias	-0.306056893086508
322	37	3	sim_local_disbias	-0.339310736322021
323	38	3	sim_local_disbias	-0.203781741166132
324	39	3	sim_local_disbias	-0.186933141848058
325	40	3	sim_local_disbias	-0.12253803105842
326	41	3	sim_local_disbias	-0.178588948053989
327	47	3	sim_local_disbias	-0.103490677708965
328	49	3	sim_local_disbias	-0.214717939636469
329	52	3	sim_local_disbias	-0.198317639993032
330	53	3	sim_local_disbias	-0.248538717486209
331	55	3	sim_local_disbias	-0.0736424171772069
332	58	3	sim_local_disbias	-0.207412694353902
333	59	3	sim_local_disbias	-0.0577486010062351
334	60	3	sim_local_disbias	-0.167198264784869
335	61	3	sim_local_disbias	-0.166643324495259
336	62	3	sim_local_disbias	-0.123920233335313
337	64	3	sim_local_disbias	-0.126829581295085
338	65	3	sim_local_disbias	-0.046159120338901
339	66	3	sim_local_disbias	-0.231084227198468
340	70	3	sim_local_disbias	-0.0852959145643953
341	71	3	sim_local_disbias	-0.17341087562197
342	72	3	sim_local_disbias	-0.146671535278424
343	73	3	sim_local_disbias	-0.253133888434651
344	77	3	sim_local_disbias	-0.159797308800771
345	1	3	sim_local_disbias_gist	0.159846643841897
346	2	3	sim_local_disbias_gist	0.0133719932676849
347	3	3	sim_local_disbias_gist	0.135187937636139
348	7	3	sim_local_disbias_gist	0.278231258241694
349	8	3	sim_local_disbias_gist	0.328714762430799
350	9	3	sim_local_disbias_gist	0.431043621081418
351	17	3	sim_local_disbias_gist	0.365838407507686
352	18	3	sim_local_disbias_gist	0.287668544224789
353	19	3	sim_local_disbias_gist	0.325176540422358
354	22	3	sim_local_disbias_gist	0.353989434034221
355	23	3	sim_local_disbias_gist	0.350754147201762
356	25	3	sim_local_disbias_gist	0.285640197050981
357	26	3	sim_local_disbias_gist	0.29884370073424
358	27	3	sim_local_disbias_gist	0.325094222978332
359	28	3	sim_local_disbias_gist	0.264299593770504
360	30	3	sim_local_disbias_gist	0.24073542764795
361	31	3	sim_local_disbias_gist	0.19070175501283
362	33	3	sim_local_disbias_gist	0.422126889950597
363	34	3	sim_local_disbias_gist	0.172615223098085
364	35	3	sim_local_disbias_gist	0.00871440137922288
365	37	3	sim_local_disbias_gist	0.0584214495292502
366	38	3	sim_local_disbias_gist	0.279133501834785
367	39	3	sim_local_disbias_gist	0.251897242147884
368	40	3	sim_local_disbias_gist	0.42301130712216
369	41	3	sim_local_disbias_gist	0.316838630931443
370	47	3	sim_local_disbias_gist	0.378587179456295
371	49	3	sim_local_disbias_gist	0.220255499810018
372	52	3	sim_local_disbias_gist	0.30720234704707
373	53	3	sim_local_disbias_gist	0.186495678230478
374	55	3	sim_local_disbias_gist	0.446106235816979
375	58	3	sim_local_disbias_gist	0.259492455453675
376	59	3	sim_local_disbias_gist	0.46157151962333
377	60	3	sim_local_disbias_gist	0.326647536122085
378	61	3	sim_local_disbias_gist	0.34541156607847
379	62	3	sim_local_disbias_gist	0.295425484477025
380	64	3	sim_local_disbias_gist	0.410880617821319
381	65	3	sim_local_disbias_gist	0.470850358200947
382	66	3	sim_local_disbias_gist	0.256140909025381
383	70	3	sim_local_disbias_gist	0.411896696584644
384	71	3	sim_local_disbias_gist	0.240732550136198
385	72	3	sim_local_disbias_gist	0.375599387917325
386	73	3	sim_local_disbias_gist	0.184724925268847
387	77	3	sim_local_disbias_gist	0.316633917154202
