# Supplementary material for: Tracking the relation between gist and item memory over the course of long-term memory consolidation
Source: eLife journal article supplement (doi:10.7554/elife.65588), 2021-07-14
Supplement: supp [file elife-65588-supp-v2.zip › elife_poa_e65588_Figure_6_source_data_1.csv]

	ID	day	optimal_weight
1	1	Session 1	0.475
2	2	Session 1	0.1
3	3	Session 1	0.3125
4	7	Session 1	0.15
5	8	Session 1	0.125
6	9	Session 1	0.175
7	17	Session 1	0.0375
8	18	Session 1	0.0375
9	19	Session 1	0.275
10	22	Session 1	0.2625
11	23	Session 1	0.1625
12	25	Session 1	0.2625
13	26	Session 1	0
14	27	Session 1	0.2875
15	28	Session 1	0.05
16	30	Session 1	0.0625
17	31	Session 1	0.1625
18	33	Session 1	0.2
19	34	Session 1	0
20	35	Session 1	0.3625
21	37	Session 1	0
22	38	Session 1	0.1375
23	39	Session 1	0.3
24	40	Session 1	0.1875
25	41	Session 1	0.225
26	47	Session 1	0.2
27	49	Session 1	0.0875
28	52	Session 1	0.325
29	53	Session 1	0.3875
30	55	Session 1	0.0625
31	58	Session 1	0.1625
32	59	Session 1	0.1375
33	60	Session 1	0
34	61	Session 1	0.1375
35	62	Session 1	0.2125
36	64	Session 1	0
37	65	Session 1	0.25
38	66	Session 1	0.025
39	70	Session 1	0.175
40	71	Session 1	0.175
41	72	Session 1	0.0375
42	73	Session 1	0.0375
43	77	Session 1	0.2875
44	1	Session 2	0.2125
45	2	Session 2	0.1375
46	3	Session 2	0.15
47	7	Session 2	0.225
48	8	Session 2	0.175
49	9	Session 2	0.125
50	17	Session 2	0.0875
51	18	Session 2	0.125
52	19	Session 2	0.125
53	22	Session 2	0.4
54	23	Session 2	0.175
55	25	Session 2	0
56	26	Session 2	0
57	27	Session 2	0.4125
58	28	Session 2	0.0625
59	30	Session 2	0.175
60	31	Session 2	0.425
61	33	Session 2	0.1375
62	34	Session 2	0.075
63	35	Session 2	0.1125
64	37	Session 2	0
65	38	Session 2	0.1875
66	39	Session 2	0.4
67	40	Session 2	0.3
68	41	Session 2	0.275
69	47	Session 2	0.3125
70	49	Session 2	0.125
71	52	Session 2	0.3625
72	53	Session 2	0.3375
73	55	Session 2	0.1375
74	58	Session 2	0.125
75	59	Session 2	0.1375
76	60	Session 2	0.075
77	61	Session 2	0.2
78	62	Session 2	0.2375
79	64	Session 2	0
80	65	Session 2	0.125
81	66	Session 2	0.05
82	70	Session 2	0.175
83	71	Session 2	0.3125
84	72	Session 2	0.0375
85	73	Session 2	0.0875
86	77	Session 2	0.3
87	1	Session 3	0.05
88	2	Session 3	0.425
89	3	Session 3	0.2875
90	7	Session 3	0.2
91	8	Session 3	0.25
92	9	Session 3	0.225
93	17	Session 3	0.1625
94	18	Session 3	0.275
95	19	Session 3	0.1625
96	22	Session 3	0.225
97	23	Session 3	0.225
98	25	Session 3	0.2
99	26	Session 3	0.0125
100	27	Session 3	0.225
101	28	Session 3	0.0375
102	30	Session 3	0.2875
103	31	Session 3	0.3125
104	33	Session 3	0.2875
105	34	Session 3	0
106	35	Session 3	0.4875
107	37	Session 3	0.15
108	38	Session 3	0.1625
109	39	Session 3	0.2375
110	40	Session 3	0.25
111	41	Session 3	0.1875
112	47	Session 3	0.3625
113	49	Session 3	0.175
114	52	Session 3	0.3375
115	53	Session 3	0.325
116	55	Session 3	0.1
117	58	Session 3	0.2125
118	59	Session 3	0.1375
119	60	Session 3	0.025
120	61	Session 3	0.3625
121	62	Session 3	0.1125
122	64	Session 3	0.0125
123	65	Session 3	0.1375
124	66	Session 3	0.0125
125	70	Session 3	0.2
126	71	Session 3	0.325
127	72	Session 3	0
128	73	Session 3	0.1625
129	77	Session 3	0.0625
