# Supplementary material for: Tracking the relation between gist and item memory over the course of long-term memory consolidation
Source: eLife journal article supplement (doi:10.7554/elife.65588), 2021-07-14
Supplement: supp [file elife-65588-supp-v2.zip › elife_poa_e65588_Figure_7_source_data_1.csv]

	V1	V2	models
1	0	0.00320791119478856	item-only
2	5	-0.00480515179442617	item-only
3	10	-0.0195909042261066	item-only
4	15	-0.0166519125274863	item-only
5	20	0.00521579569843187	item-only
6	25	-0.0348404619091062	item-only
7	30	-0.0333707804900957	item-only
8	35	-0.0291649995229484	item-only
9	40	-0.0414004303070183	item-only
10	45	-0.0475631380804828	item-only
11	50	-0.0429018246512774	item-only
12	55	-0.0643629102157452	item-only
13	60	-0.0653864729540087	item-only
14	65	-0.0829490528611763	item-only
15	70	-0.0675223508164759	item-only
16	75	-0.0683643765552601	item-only
17	80	-0.0697295687113244	item-only
18	85	-0.0828942036239759	item-only
19	90	-0.0655671178794153	item-only
20	95	-0.105511825345069	item-only
21	100	-0.0903959797705136	item-only
22	105	-0.104490929642126	item-only
23	110	-0.108812809374323	item-only
24	115	-0.114092746039923	item-only
25	120	-0.12812479431139	item-only
26	125	-0.138161311666121	item-only
27	130	-0.140980957970732	item-only
28	135	-0.128719504650148	item-only
29	140	-0.137897778627229	item-only
30	145	-0.118130845289542	item-only
31	150	-0.113046414028826	item-only
32	155	-0.125918358971069	item-only
33	160	-0.125230609572094	item-only
34	165	-0.141458453245689	item-only
35	170	-0.128629727296058	item-only
36	175	-0.137511943222097	item-only
37	180	-0.136079785478343	item-only
38	185	-0.134445567539397	item-only
39	190	-0.138095921275824	item-only
40	195	-0.146598020731908	item-only
41	200	-0.139709607062391	item-only
42	205	-0.137928177938918	item-only
43	210	-0.153408906517598	item-only
44	215	-0.16003061382072	item-only
45	220	-0.153446572820901	item-only
46	225	-0.169273587070761	item-only
47	230	-0.159491689033542	item-only
48	235	-0.191098483671424	item-only
49	240	-0.196411180901407	item-only
50	245	-0.193255218540343	item-only
51	250	-0.201481164440883	item-only
52	255	-0.194823270304109	item-only
53	260	-0.178662569177299	item-only
54	265	-0.206866165271176	item-only
55	270	-0.2136571849759	item-only
56	275	-0.206279284716073	item-only
57	280	-0.220276283770762	item-only
58	285	-0.207069645920413	item-only
59	290	-0.211067417086859	item-only
60	295	-0.204700479384205	item-only
61	300	-0.189258177134393	item-only
62	305	-0.186833884938866	item-only
63	310	-0.184332599961867	item-only
64	315	-0.200378811250783	item-only
65	320	-0.187564868344172	item-only
66	325	-0.19881101616861	item-only
67	330	-0.191522615944667	item-only
68	335	-0.189229449558311	item-only
69	340	-0.191649862210893	item-only
70	345	-0.203527643321384	item-only
71	350	-0.196602168034278	item-only
72	355	-0.196869799347993	item-only
73	360	-0.202727852406866	item-only
74	365	-0.200314291136851	item-only
75	370	-0.208994645088972	item-only
76	375	-0.196529267957949	item-only
77	380	-0.210869809474848	item-only
78	385	-0.206769608246242	item-only
79	390	-0.208301179256168	item-only
80	395	-0.211794679721728	item-only
81	400	-0.212634881678217	item-only
82	405	-0.215852746068123	item-only
83	410	-0.222728889928296	item-only
84	415	-0.230651533551679	item-only
85	420	-0.240729774245192	item-only
86	425	-0.235194748434689	item-only
87	430	-0.238745848360296	item-only
88	435	-0.248625311919767	item-only
89	440	-0.25017676203394	item-only
90	445	-0.263466028075047	item-only
91	450	-0.268564604949975	item-only
92	455	-0.269096156926054	item-only
93	460	-0.278817720991866	item-only
94	465	-0.276461314206588	item-only
95	470	-0.284470504755441	item-only
96	475	-0.286325256144469	item-only
97	480	-0.301075123994279	item-only
98	485	-0.308509417614757	item-only
99	490	-0.300818564550115	item-only
100	495	-0.312217626094645	item-only
101	500	-0.322680694201245	item-only
102	0	0.497715256930834	gist-bias
103	5	0.497728180365251	gist-bias
104	10	0.488154295851802	gist-bias
105	15	0.488632613501621	gist-bias
106	20	0.484182036172737	gist-bias
107	25	0.48497913198142	gist-bias
108	30	0.483170614406086	gist-bias
109	35	0.477102650097521	gist-bias
110	40	0.500399642076651	gist-bias
111	45	0.466797448514757	gist-bias
112	50	0.465641821702095	gist-bias
113	55	0.467371449727821	gist-bias
114	60	0.465840036480126	gist-bias
115	65	0.465023933295177	gist-bias
116	70	0.457892310016787	gist-bias
117	75	0.455315467424402	gist-bias
118	80	0.452767044009802	gist-bias
119	85	0.451485304358668	gist-bias
120	90	0.451968202426094	gist-bias
121	95	0.440213488727513	gist-bias
122	100	0.426176702106135	gist-bias
123	105	0.429092521029327	gist-bias
124	110	0.409788255011494	gist-bias
125	115	0.425448323207132	gist-bias
126	120	0.413352017115473	gist-bias
127	125	0.410425671730616	gist-bias
128	130	0.417805835810847	gist-bias
129	135	0.415041225123376	gist-bias
130	140	0.402229301990185	gist-bias
131	145	0.40558214624326	gist-bias
132	150	0.403335210013174	gist-bias
133	155	0.393954181021405	gist-bias
134	160	0.392042380452186	gist-bias
135	165	0.389840611437444	gist-bias
136	170	0.38401627840132	gist-bias
137	175	0.380858661675396	gist-bias
138	180	0.378342467577775	gist-bias
139	185	0.366879701685142	gist-bias
140	190	0.371138308317702	gist-bias
141	195	0.372640687543498	gist-bias
142	200	0.361474119256892	gist-bias
143	205	0.34588535683291	gist-bias
144	210	0.337682662731753	gist-bias
145	215	0.334286163382145	gist-bias
146	220	0.330259370799236	gist-bias
147	225	0.318285988246203	gist-bias
148	230	0.312548545204706	gist-bias
149	235	0.295761277646531	gist-bias
150	240	0.295378820647078	gist-bias
151	245	0.287048995815085	gist-bias
152	250	0.283879795860554	gist-bias
153	255	0.262682687683095	gist-bias
154	260	0.260563263805745	gist-bias
155	265	0.246081222123444	gist-bias
156	270	0.220442366173392	gist-bias
157	275	0.21838572923411	gist-bias
158	280	0.231623000939727	gist-bias
159	285	0.209868286860888	gist-bias
160	290	0.199123352013344	gist-bias
161	295	0.192794576551496	gist-bias
162	300	0.180932831760055	gist-bias
163	305	0.166367479837391	gist-bias
164	310	0.15995164762526	gist-bias
165	315	0.164749352329593	gist-bias
166	320	0.145887249724555	gist-bias
167	325	0.135300288567835	gist-bias
168	330	0.129779115003537	gist-bias
169	335	0.116495824243018	gist-bias
170	340	0.11067048380245	gist-bias
171	345	0.101594557797599	gist-bias
172	350	0.0840184726667541	gist-bias
173	355	0.0801618923476732	gist-bias
174	360	0.0666414068603857	gist-bias
175	365	0.0543942299108215	gist-bias
176	370	0.0501997346133935	gist-bias
177	375	0.0403732606594391	gist-bias
178	380	0.0376526469045112	gist-bias
179	385	0.0216326068697793	gist-bias
180	390	0.00726720685271263	gist-bias
181	395	-0.00675966181201738	gist-bias
182	400	-0.00172346011372025	gist-bias
183	405	-0.00833528357334861	gist-bias
184	410	-0.0299089589069165	gist-bias
185	415	-0.0322610619424932	gist-bias
186	420	-0.0384039969449406	gist-bias
187	425	-0.0463877016326967	gist-bias
188	430	-0.0652353485371143	gist-bias
189	435	-0.0626288788833636	gist-bias
190	440	-0.0759504524641781	gist-bias
191	445	-0.0924379601156645	gist-bias
192	450	-0.0967850077699427	gist-bias
193	455	-0.0993679584805673	gist-bias
194	460	-0.10553728733757	gist-bias
195	465	-0.115948195833474	gist-bias
196	470	-0.122572408156935	gist-bias
197	475	-0.130633709817589	gist-bias
198	480	-0.139577080064026	gist-bias
199	485	-0.143144960742537	gist-bias
200	490	-0.157340695565083	gist-bias
201	495	-0.162285263905771	gist-bias
202	500	-0.167745604774538	gist-bias
