# Supplementary figures and images for: Tracking the relation between gist and item memory over the course of long-term memory consolidation
Source: eLife journal article supplement (doi:10.7554/elife.65588), 2021-07-14

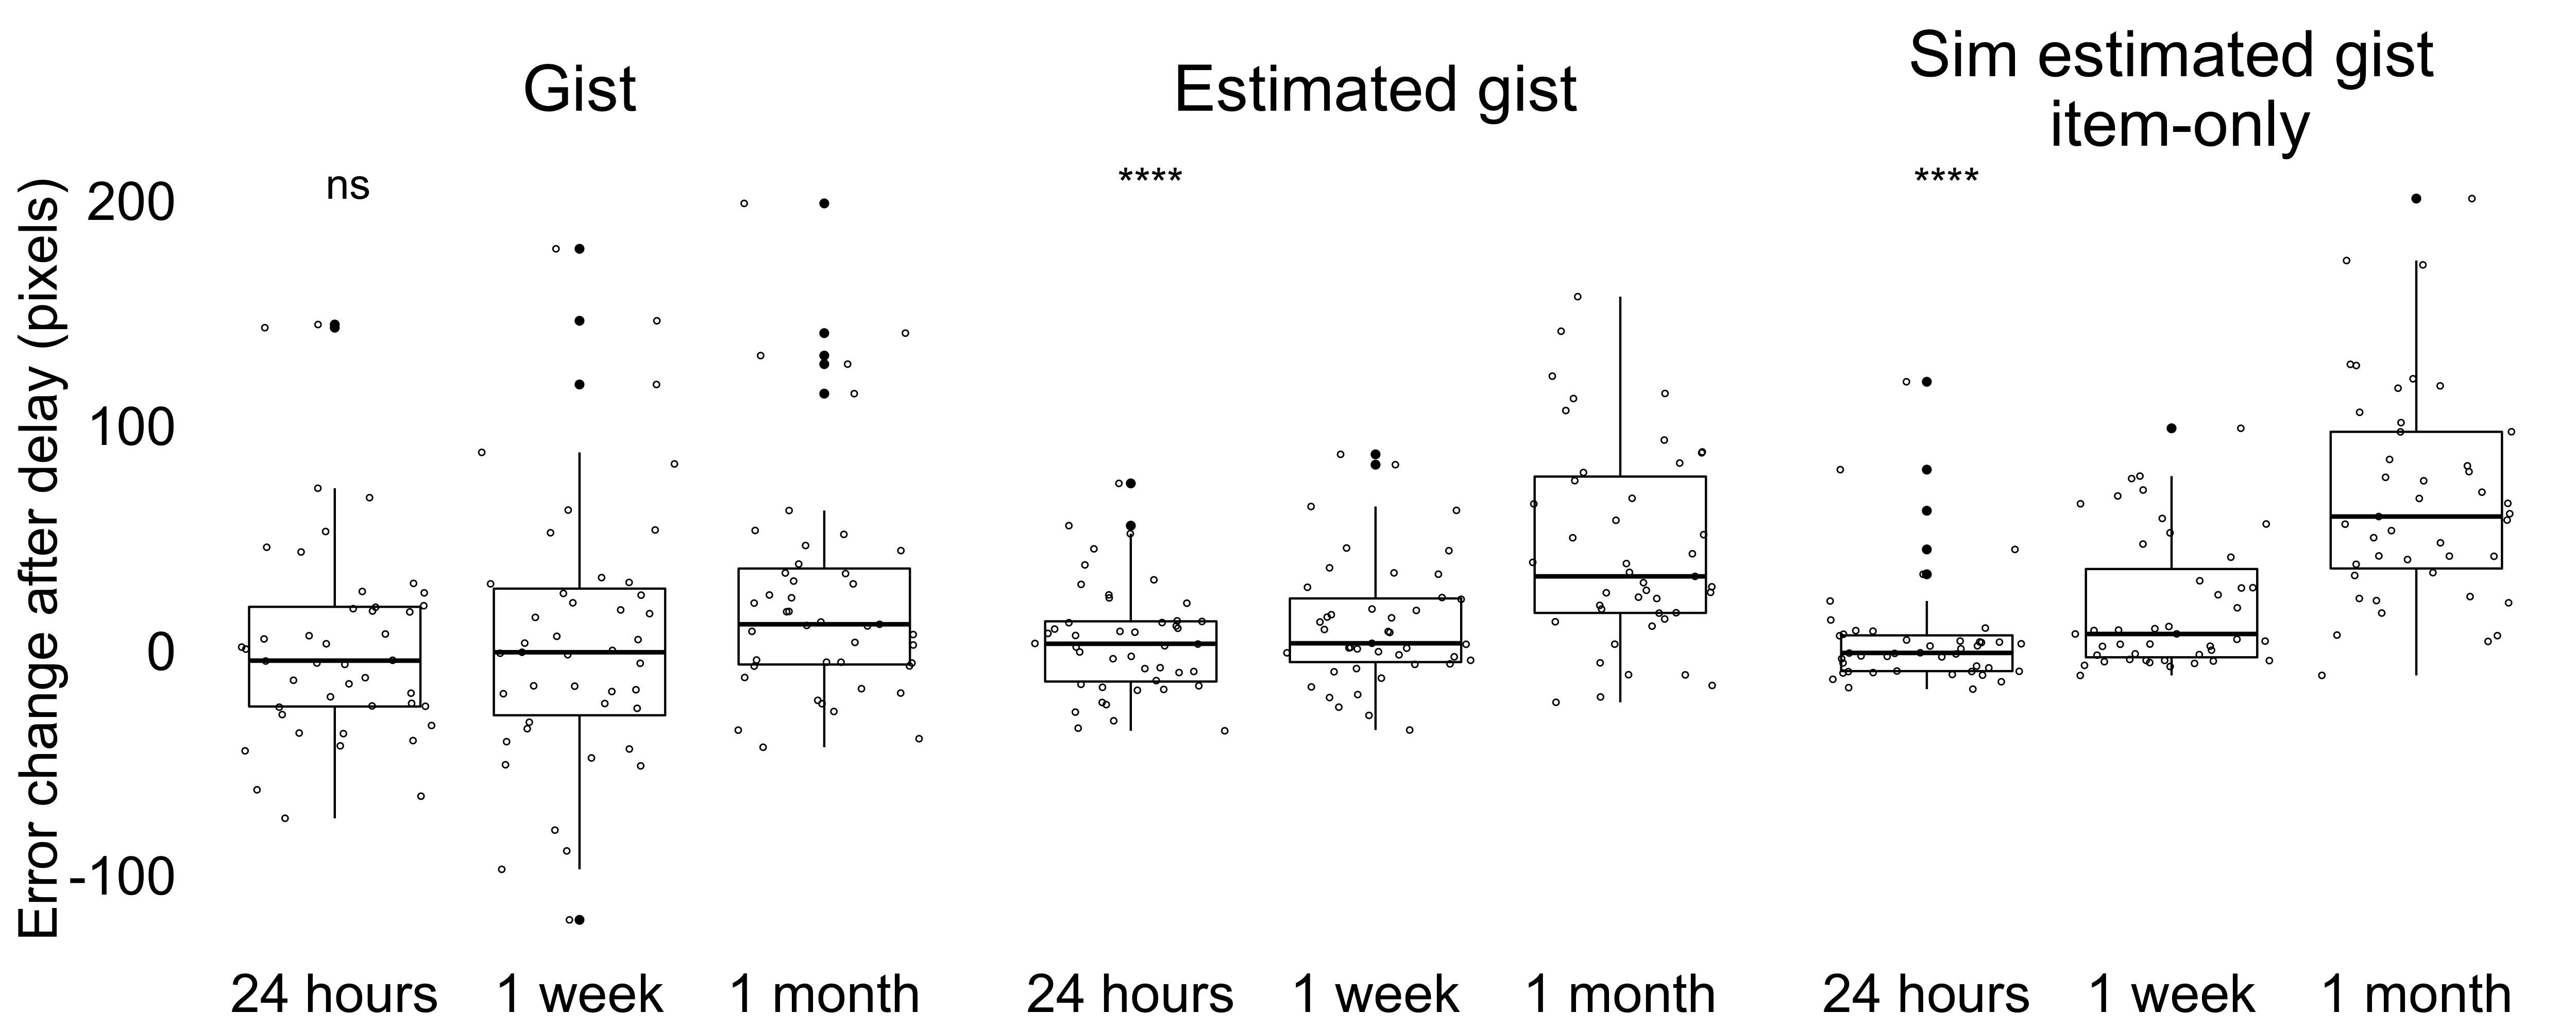

Supplement: supp [file elife-65588-supp-v2.zip › elife_poa_e65588_Figure_2_figure_supplement_2.jpg]

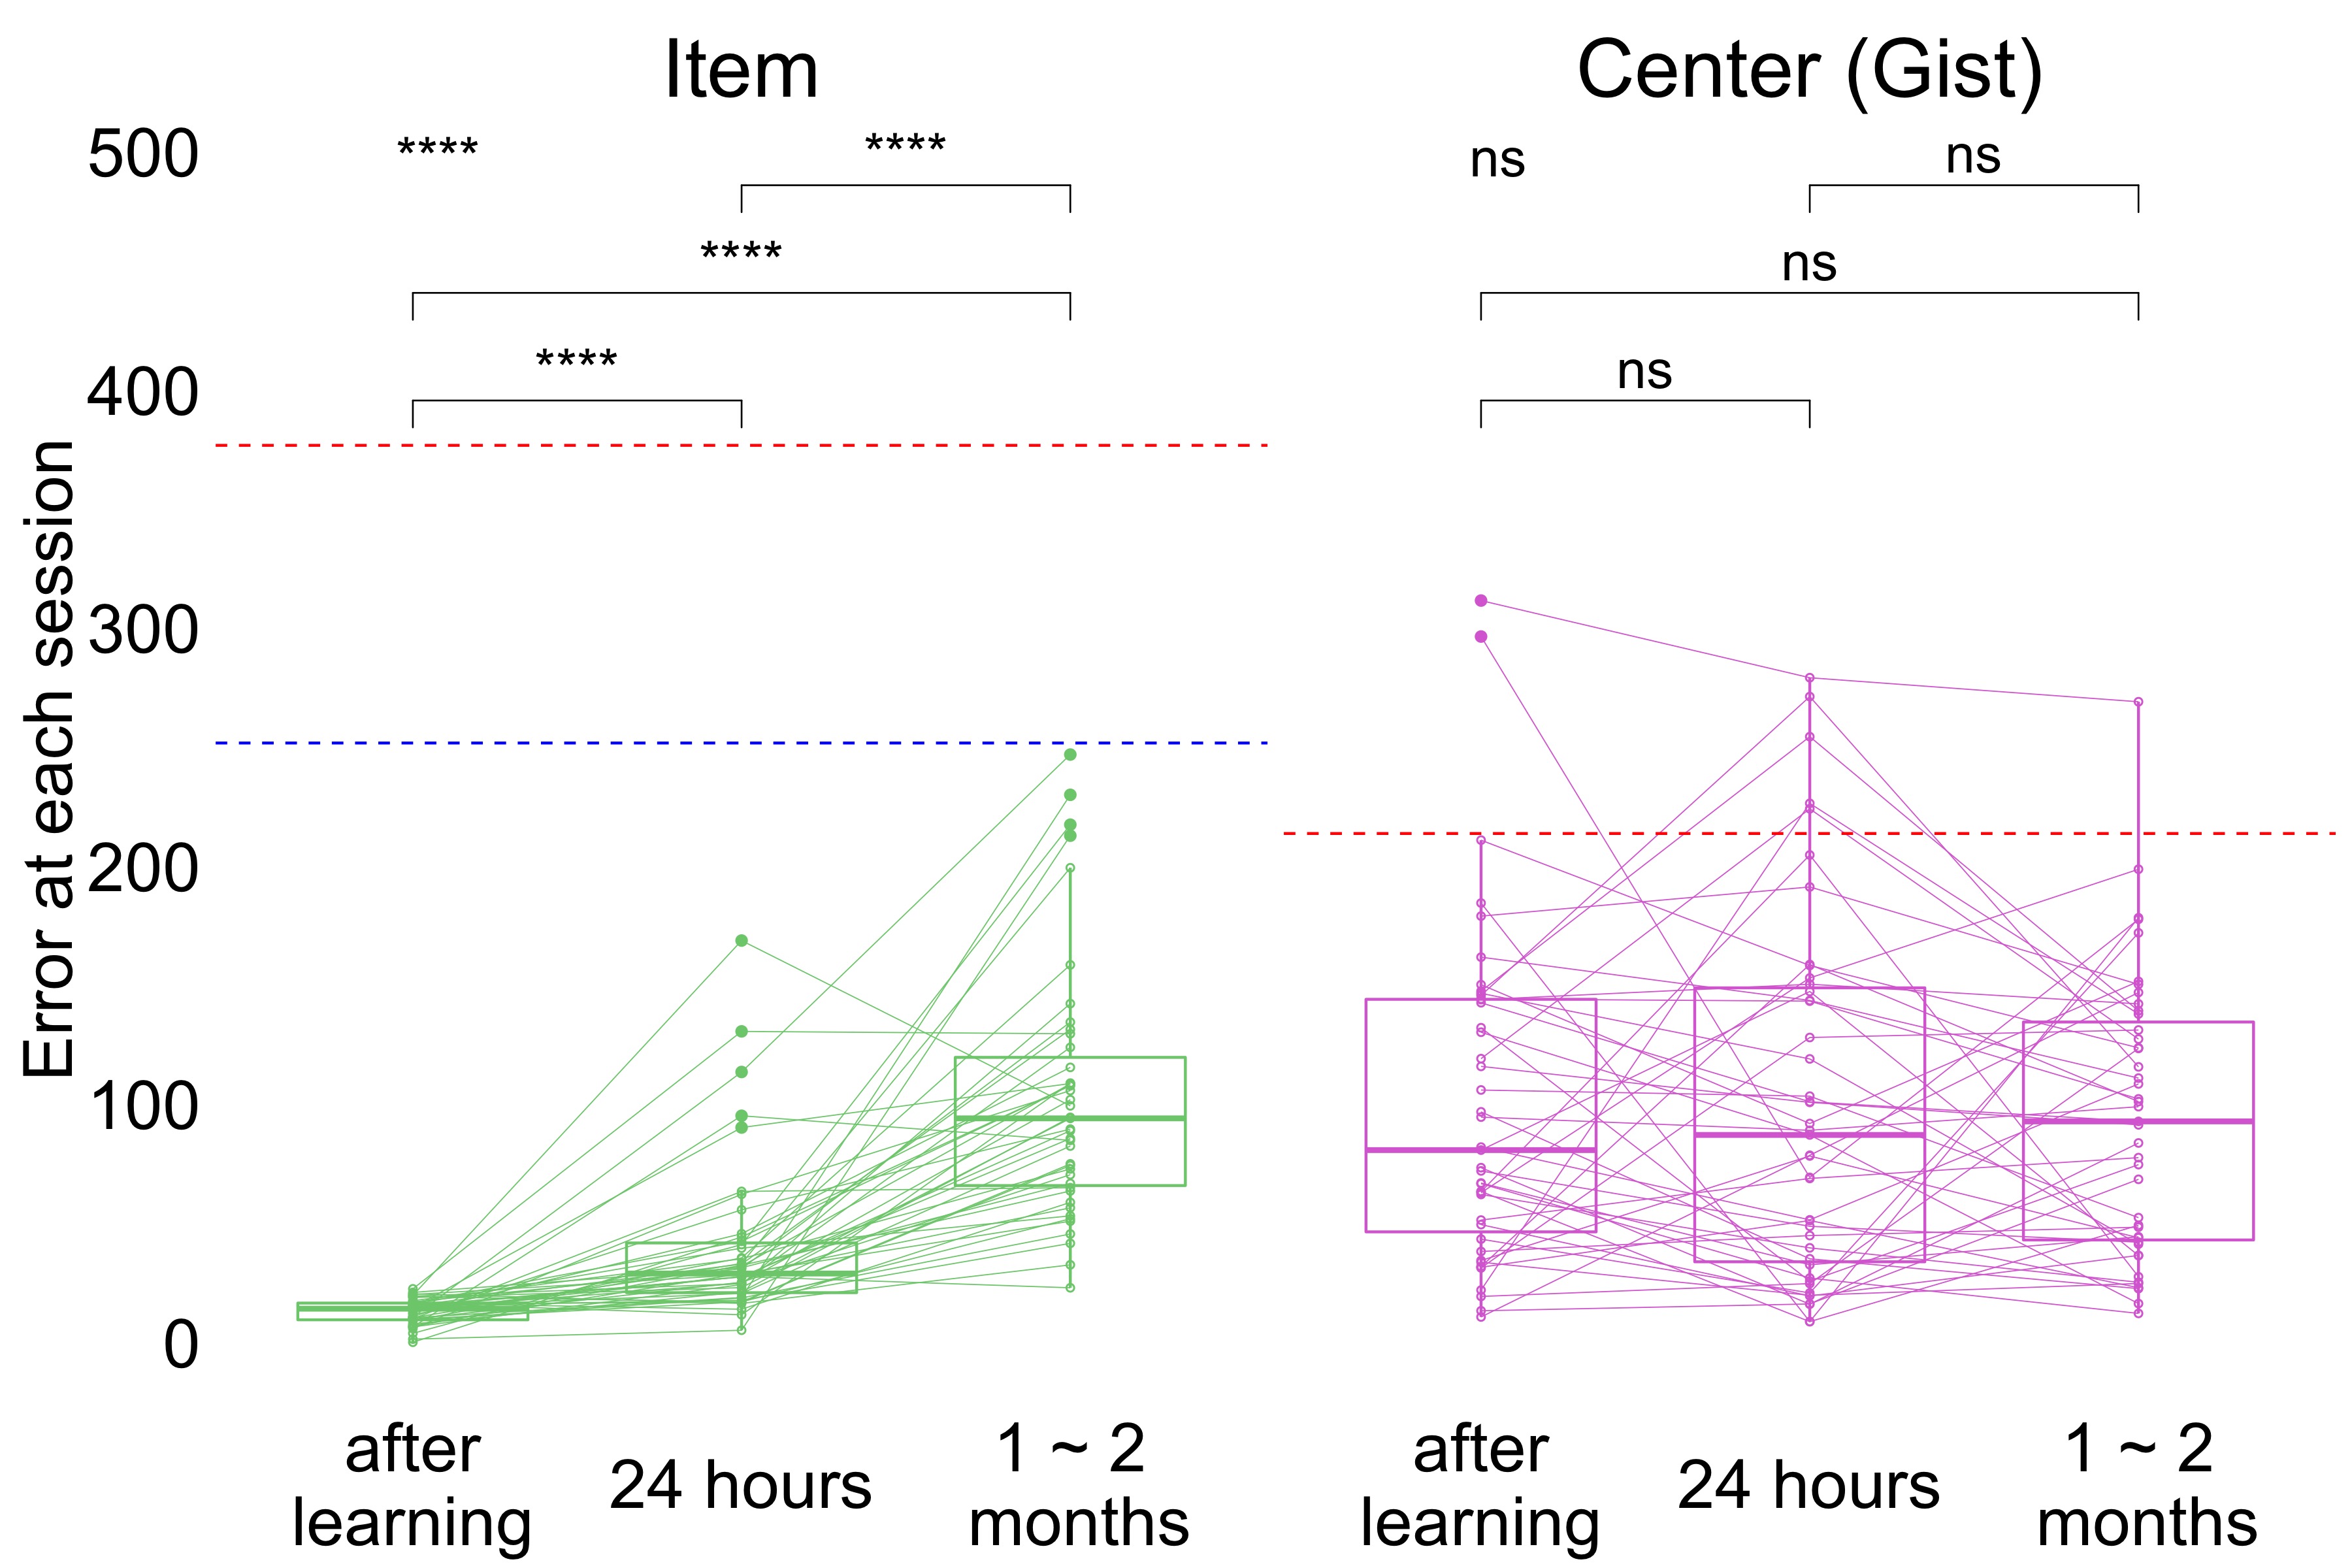

Supplement: supp [file elife-65588-supp-v2.zip › elife_poa_e65588_Figure_4_figure_supplement_1.jpg]
